# Supplementary material for: Organocatalytic asymmetric addition of alcohols to cyclic trifluoromethyl ketimines: highly enantioselective synthesis of chiral N,O-ketals
Source: Royal Society of Chemistry journal article supplement (doi:10.1039/c6ob00890a), 2016-01-01
Supplement: c6ob00890a1.pdf [file c6ob00890a1.pdf]

Supplementary Information

**Organocatalytic Asymmetric Addition of Alcohols to Cyclic  
Trifluoromethyl Ketimines: Highly Enantioselective  
Synthesis of Chiral N, O-Ketals**

Ding Zhou,<sup>a</sup> Xueting Yu,<sup>a</sup> Jian Zhang,<sup>a</sup> Wei Wang<sup>\*a,b</sup> and Hexin Xie<sup>\*a</sup>

<sup>a</sup>State Key Laboratory of Bioreactor Engineering, Shanghai Key Laboratory of New Drug Design, School of Pharmacy, East China University of Science and Technology, Shanghai 200237, China. <sup>b</sup>Department of Chemistry and Chemical Biology, University of New Mexico, Albuquerque, New Mexico 87131-0001, United States

E-mail: [xiehixin@ecust.edu.cn](mailto:xiehixin@ecust.edu.cn)

[wwang@unm.edu](mailto:wwang@unm.edu)

**Contents**

|                                                             |    |
|-------------------------------------------------------------|----|
| General Information.....                                    | 2  |
| General Procedure for Synthesis of Compounds <b>3</b> ..... | 3  |
| General Procedure for Synthesis of Compounds <b>4</b> ..... | 12 |
| References.....                                             | 15 |
| <sup>1</sup> H and <sup>13</sup> C-NMR spectra .....        | 16 |
| Chiral HPLC traces .....                                    | 42 |

## General Information

Unless otherwise noted, all reagents were obtained commercially and used without further purification. Unless otherwise specified, all other reagents were purchased from Acros, Aldrich, Fisher, Adamas-beta Co. Ltd. or TCI and used without further purification.  $^1\text{H}$ ,  $^{13}\text{C}$  were recorded at 400 or 500 MHz ( $^1\text{H}$  NMR), 100 or 125 MHz ( $^{13}\text{C}$  NMR). Chemical shifts were reported in ppm from the solvent resonance as the internal standard ( $d_6$ -DMSO:  $\delta\text{H}=2.50$  ppm,  $\delta\text{C}=39.52$  ppm;  $\text{CDCl}_3$ ,  $\delta\text{H}=7.26$  ppm,  $\delta\text{C}=77.00$  ppm). Chemical shifts were reported in parts per million (ppm,  $\delta$ ) downfield from tetramethylsilane ( $\delta=0.00$  ppm). Proton coupling patterns are described as singlet (s), doublet (d), triplet (t), quartet (q), multiplet (m), and broad (br).

**Materials:** Toluene and  $\text{CH}_2\text{Cl}_2$  were distilled from  $\text{CaH}_2$ . All purchased reagents were used without further purification. Analytical thin layer chromatography was performed on 0.20 mm Qingdao Haiyang silica gel plates. Silica gel (200–300 mesh) (from Qingdao Haiyang Chem. Company, Ltd.) was used for flash chromatography. Standard reagents and solvents were purified according to known procedures. Catalysts **I-V** were prepared from quinine<sup>1</sup> Catalyst **VI** was synthesized according to literatures.<sup>2</sup> The ketimines were synthesized according to literatures.<sup>1,3,4</sup>

## General Procedure for Synthesis of Compounds 3

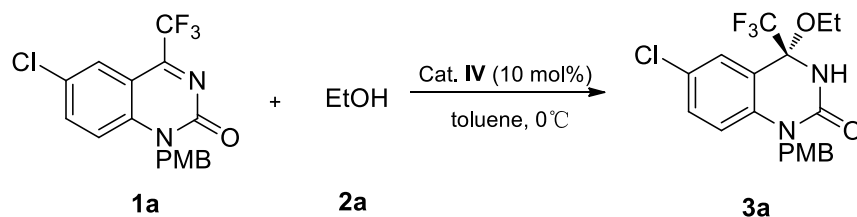

PMB=*p*-methoxybenzyl

The mixture of cyclic ketimine **1a** (0.054 mmol, 20.0 mg), bifunctional catalyst **IV** (3.2 mg, 10 mol%) and alcohol **2a** (0.272 mmol, 15.9  $\mu$ L) in toluene (0.5 mL) was added into a 10 mL schlenk flask equipped with a stirring bar under Ar atmosphere. The reaction was then stirred at rt. After completion of the reaction (monitored by TLC), the residue was purified by column chromatography on silica gel (eluting with petroleum ether/ethyl acetate) to give the product **3a** in 90% yield.

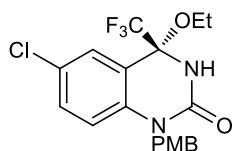

**(R)-6-chloro-4-ethoxy-1-(4-methoxybenzyl)-4-(trifluoromethyl)-3,4-dihydroquinazolin-2(1H)-one (3a)**. The title compound was prepared according to the general procedure (reaction time: 1 h) and purified by column chromatography on silica gel (petroleum ether/ethyl acetate = 5:1) to afford 54.7 mg (90%).  $[\alpha]_{\text{D}}^{25} = -26.4^{\circ}$  (c 0.5,  $\text{CH}_2\text{Cl}_2$ );  $^1\text{H NMR}$  (500 MHz,  $\text{CDCl}_3$ )  $\delta$  7.51 (s, 1H), 7.34 – 7.23 (m, 1H), 7.15 (d,  $J = 8.4$  Hz, 2H), 6.95 – 6.78 (m, 3H), 6.36 (br, 1H), 5.27 (d,  $J = 16.2$  Hz, 1H), 5.02 (d,  $J = 16.3$  Hz, 1H), 3.79 (s, 3H), 3.66 (dq,  $J = 14.2, 7.0$  Hz, 1H), 3.31 (dq,  $J = 14.1, 7.0$  Hz, 1H), 1.27 (t,  $J = 7.5$  Hz, 3H).  $^{13}\text{C NMR}$  (125 MHz,  $\text{CDCl}_3$ )  $\delta$  158.96, 151.90, 137.25, 131.63, 128.13, 127.78, 127.53, 127.23, 116.19, 115.53, 114.37, 85.35 (q,  $J = 32.1$  Hz), 59.14, 55.27, 45.42, 14.98. HRMS (ESI)  $m/z$  calcd for  $\text{C}_{19}\text{H}_{19}\text{ClF}_3\text{N}_2\text{O}_3$  ( $\text{M}+1$ ) $^+$  415.1036, found 415.1023. (Chiralpak AS-3R,  $\text{CH}_3\text{CN}/\text{H}_2\text{O} = 80/20$ , flow rate = 0.8 mL/min,  $\lambda = 254$  nm):  $t_{\text{minor}} = 4.273$  min,  $t_{\text{major}} = 3.301$  min, ee = 94%.

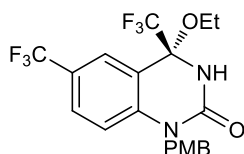

**(R)-4-ethoxy-1-(4-methoxybenzyl)-4,6-bis(trifluoromethyl)-3,4-dihydroquinazolin-2(1H)-one (3b)**. The title compound was prepared according to the general procedure (reaction time: 3 h) and purified by column chromatography on silica gel (petroleum ether/ethyl acetate = 5:1) to afford 26.3 mg (91%).  $[\alpha]_{\text{D}}^{25} = -10.6^{\circ}$  (c 0.5,  $\text{CH}_2\text{Cl}_2$ );  $^1\text{H NMR}$  (500 MHz,  $\text{CDCl}_3$ )  $\delta$  7.79 (s, 1H), 7.58 (d,  $J = 8.7$  Hz, 1H), 7.17 (d,  $J = 8.6$  Hz, 2H), 7.04 (d,  $J = 8.8$  Hz, 1H), 6.88 (d,  $J = 8.7$  Hz, 2H), 6.44 (s, 1H), 5.32

(d,  $J = 16.2$  Hz, 1H), 5.08 (d,  $J = 16.4$  Hz, 1H), 3.79 (s, 3H), 3.67 (dq,  $J = 14.1, 7.0$  Hz, 1H), 3.29 (dq,  $J = 14.1, 7.0$  Hz, 1H), 1.27 (t,  $J = 7.0$  Hz, 3H).  $^{13}\text{C}$  NMR (126 MHz,  $\text{CDCl}_3$ )  $\delta$  159.05, 151.83, 141.38, 128.68, 128.65, 127.56, 127.46, 124.88, 123.11 (q,  $J = 139.2$  Hz), 115.08, 114.44, 85.43 (q,  $J = 32.2$  Hz), 59.33, 55.27, 45.54, 14.95. HRMS (ESI)  $m/z$  calcd for  $\text{C}_{20}\text{H}_{19}\text{F}_6\text{N}_2\text{O}_3$  ( $M+1$ ) $^+$  449.1300, found 449.1285. (Chiralpak AS-3R,  $\text{CH}_3\text{CN}/\text{H}_2\text{O} = 80/20$ , flow rate = 0.8 mL/min,  $\lambda = 254$  nm):  $t_{\text{minor}} = 3.310$  min,  $t_{\text{major}} = 2.906$  min, ee = 92%.

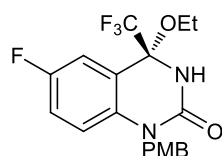

**(R)-4-ethoxy-6-fluoro-1-(4-methoxybenzyl)-4-(trifluoromethyl)-3,4-dihydroquinazolin-2(1H)-one (3c).** The title compound was prepared according to the general procedure (reaction time: 3 h) and purified by column chromatography on silica gel (petroleum ether/ethyl acetate = 5:1) to afford 30.5 mg (92%).  $[\alpha]_{\text{D}}^{25} = -6.2^\circ$  (c 0.5,  $\text{CH}_2\text{Cl}_2$ );  $^1\text{H}$  NMR (500 MHz,  $\text{CDCl}_3$ )  $\delta$  7.27 (d,  $J = 11.4$  Hz, 1H), 7.17 (d,  $J = 8.2$  Hz, 2H), 7.05 (t,  $J = 7.0$  Hz, 1H), 6.98 – 6.74 (m, 3H), 6.25 (br, 1H), 5.27 (d,  $J = 16.1$  Hz, 1H), 5.03 (d,  $J = 16.2$  Hz, 1H), 3.79 (s, 3H), 3.72 – 3.61 (m, 1H), 3.40 – 3.19 (m, 1H), 1.26 (t,  $J = 6.9$  Hz, 3H).  $^{13}\text{C}$  NMR (125 MHz,  $\text{CDCl}_3$ )  $\delta$  158.48, 156.73, 134.50, 127.53, 127.10, 118.22 (d,  $J = 21.3$  Hz), 115.83 (d,  $J = 7.5$  Hz), 115.07 (d,  $J = 7.5$  Hz), 113.90, 113.70 (d,  $J = 23.8$  Hz), 84.93 (q,  $J = 31.7$  Hz), 58.63, 54.81, 45.07, 14.51. HRMS (ESI)  $m/z$  calcd for  $\text{C}_{19}\text{H}_{19}\text{F}_4\text{N}_2\text{O}_3$  ( $M+1$ ) $^+$  399.1332, found 399.1320. (Chiralpak AS-3R,  $\text{CH}_3\text{CN}/\text{H}_2\text{O} = 80/20$ , flow rate = 0.8 mL/min,  $\lambda = 254$  nm):  $t_{\text{minor}} = 3.835$  min,  $t_{\text{major}} = 3.063$  min, ee = 95%.

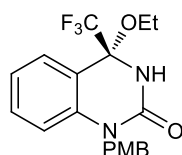

**(R)-4-ethoxy-1-(4-methoxybenzyl)-4-(trifluoromethyl)-3,4-dihydroquinazolin-2(1H)-one (3d).** The title compound was prepared according to the general procedure (reaction time: 7 h) and purified by column chromatography on silica gel (petroleum ether/ethyl acetate = 5:1) to afford 22.1 mg (95%).  $[\alpha]_{\text{D}}^{25} = -2.0^\circ$  (c 0.25,  $\text{CH}_2\text{Cl}_2$ );  $^1\text{H}$  NMR (500 MHz,  $\text{CDCl}_3$ )  $\delta$  7.53 (d,  $J = 7.8$  Hz, 1H), 7.31 (t,  $J = 7.2$  Hz, 1H), 7.17 (d,  $J = 8.6$  Hz, 2H), 7.08 (t,  $J = 7.6$  Hz, 1H), 6.92 (d,  $J = 8.4$  Hz, 1H), 6.85 (d,  $J = 8.6$  Hz, 2H), 6.10 (s, 1H), 5.26 (d,  $J = 16.3$  Hz, 1H), 5.04 (d,  $J = 16.3$  Hz, 1H), 3.77 (s, 3H), 3.62 (dq,  $J = 14.1, 7.1$  Hz, 1H), 3.28 (dq,  $J = 14.2, 7.1$  Hz, 1H), 1.23 (t,  $J = 7.0$  Hz, 3H).  $^{13}\text{C}$  NMR (125 MHz,  $\text{CDCl}_3$ )  $\delta$  158.83, 152.10, 138.60, 131.53, 128.32, 127.57, 127.51, 122.86 (q,  $J = 285.4$  Hz), 122.56, 114.71, 114.27, 113.78, 85.76 (q,  $J = 32.1$  Hz), 58.90, 55.26, 45.26, 15.00. HRMS (ESI)  $m/z$  calcd for  $\text{C}_{19}\text{H}_{20}\text{F}_3\text{N}_2\text{O}_3$  ( $M+1$ ) $^+$  381.1426, found 381.1413. (Chiralpak AS-3R,  $\text{CH}_3\text{CN}/\text{H}_2\text{O} = 80/20$ , flow rate = 0.8 mL/min,  $\lambda = 254$  nm):  $t_{\text{minor}} = 4.208$  min,  $t_{\text{major}} = 3.183$  min, ee = 94%.

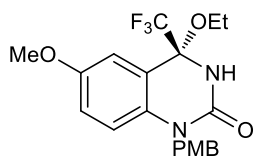

**(R)-4-ethoxy-6-methoxy-1-(4-methoxybenzyl)-4-(trifluoromethyl)-3,4-dihydroquinazolin-2(1H)-one (3e).** The title compound was prepared according to the general procedure (reaction time: 22 h) and purified by column chromatography on silica gel (petroleum ether/ethyl acetate = 4:1) to afford 34.0 mg (99%).  $[\alpha]_D^{25} = -21.0^\circ$  (c 0.5,  $\text{CH}_2\text{Cl}_2$ );  $^1\text{H NMR}$  (500 MHz,  $\text{CDCl}_3$ )  $\delta$  7.17 (d,  $J = 8.6$  Hz, 2H), 7.07 (s, 1H), 6.94 – 6.82 (m, 4H), 6.06 (br, 1H), 5.26 (d,  $J = 16.2$  Hz, 1H), 5.02 (d,  $J = 16.3$  Hz, 1H), 3.78 (s, 6H), 3.66 (dq,  $J = 8.9, 7.0$  Hz, 1H), 3.32 (dq,  $J = 9.0, 7.0$  Hz, 1H), 1.25 (t,  $J = 7.0$  Hz, 3H).  $^{13}\text{C NMR}$  (125 MHz,  $\text{CDCl}_3$ )  $\delta$  158.80, 155.07, 152.02, 132.20, 128.44, 127.55, 117.47, 115.93, 114.84, 114.25, 112.14, 85.71 (q,  $J = 31.7$  Hz), 58.91, 55.64, 55.25, 45.30, 15.05. HRMS (ESI)  $m/z$  calcd for  $\text{C}_{20}\text{H}_{22}\text{F}_3\text{N}_2\text{O}_4$  ( $\text{M}+1$ )<sup>+</sup> 411.1532, found 411.1520. (Chiralpak AS-3R,  $\text{CH}_3\text{CN}/\text{H}_2\text{O} = 80/20$ , flow rate = 0.8 mL/min,  $\lambda = 254$  nm):  $t_{\text{minor}} = 4.044$  min,  $t_{\text{major}} = 3.133$  min, ee = 95%.

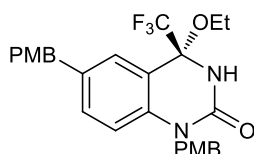

**(R)-4-ethoxy-1,6-bis(4-methoxybenzyl)-4-(trifluoromethyl)-3,4-dihydroquinazolin-2(1H)-one (3f).** The title compound was prepared according to the general procedure (reaction time: 22 h) and purified by column chromatography on silica gel (petroleum ether/ethyl acetate = 4:1) to afford 33.0 mg (98%).  $[\alpha]_D^{25} = -11.8^\circ$  (c 0.5,  $\text{CH}_2\text{Cl}_2$ );  $^1\text{H NMR}$  (500 MHz,  $\text{CDCl}_3$ )  $\delta$  7.36 (s, 1H), 7.17 (d,  $J = 8.6$  Hz, 2H), 7.11 (d,  $J = 8.5$  Hz, 1H), 7.07 (d,  $J = 8.5$  Hz, 2H), 6.85 (t,  $J = 8.6$  Hz, 5H), 6.11 (br, 1H), 5.24 (d,  $J = 16.1$  Hz, 1H), 5.02 (d,  $J = 16.2$  Hz, 1H), 3.89 (s, 2H), 3.80 (t,  $J = 8.2$  Hz, 6H), 3.62 (dq,  $J = 14.2, 7.1$  Hz, 1H), 3.25 (dq,  $J = 14.2, 7.1$  Hz, 1H), 1.19 (t,  $J = 7.0$  Hz, 3H).  $^{13}\text{C NMR}$  (125 MHz,  $\text{CDCl}_3$ )  $\delta$  158.36, 157.70, 151.70, 136.29, 135.72, 132.03, 131.42, 129.29, 127.99, 127.16, 127.04, 114.38, 113.81, 113.56, 113.25, 85.34 (q,  $J = 31.7$  Hz), 58.49, 54.82, 54.80, 44.84, 39.60, 14.52. HRMS (ESI)  $m/z$  calcd for  $\text{C}_{27}\text{H}_{28}\text{F}_3\text{N}_2\text{O}_4$  ( $\text{M}+1$ )<sup>+</sup> 501.2001, found 501.1986. (Chiralpak OD-3R,  $\text{CH}_3\text{CN}/\text{H}_2\text{O} = 80/20$ , flow rate = 0.8 mL/min,  $\lambda = 254$  nm):  $t_{\text{minor}} = 4.808$  min,  $t_{\text{major}} = 3.389$  min, ee = 94%.

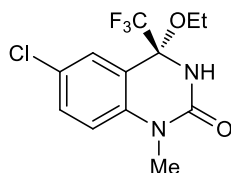

**(R)-6-chloro-4-ethoxy-1-methyl-4-(trifluoromethyl)-3,4-dihydroquinazolin-2(1H)-one (3g).** The title compound was prepared according to the general procedure (reaction time: 4.5 h) and purified by column chromatography on silica gel (petroleum ether/ethyl acetate = 4:1) to afford 19.4 mg (83%).  $[\alpha]_D^{25} = 4.0^\circ$  (c 0.1,  $\text{CH}_2\text{Cl}_2$ );  $^1\text{H NMR}$  (500 MHz,  $\text{CDCl}_3$ )  $\delta$  7.51 (s, 1H), 7.44 (d,  $J = 8.8$  Hz, 1H), 6.95 (d,  $J = 8.8$  Hz,

1H), 6.10 (s, 1H), 3.59 (dq,  $J = 14.2, 7.1$  Hz, 1H), 3.38 (s, 3H), 3.24 (dq,  $J = 14.2, 7.1$  Hz, 1H), 1.23 (t,  $J = 7.0$  Hz, 3H).  $^{13}\text{C}$  NMR (125 MHz,  $\text{CDCl}_3$ )  $\delta$  150.90, 137.73, 131.30, 127.62, 126.79, 114.79, 114.58, 84.84 (q,  $J = 32.5$  Hz), 58.60, 29.22, 14.50. HRMS (ESI)  $m/z$  calcd for  $\text{C}_{12}\text{H}_{13}\text{ClF}_3\text{N}_2\text{O}_2$  ( $\text{M}+1$ ) $^+$  309.0618, found 309.0608. (Chiralpak OD-3R,  $\text{CH}_3\text{CN}/\text{H}_2\text{O} = 70/30$ , flow rate = 0.8 mL/min,  $\lambda = 254$  nm):  $t_{\text{minor}} = 5.714$  min,  $t_{\text{major}} = 4.839$  min, ee = 95%.

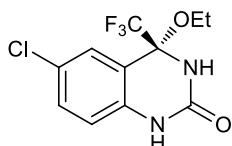

**(R)-6-chloro-4-ethoxy-4-(trifluoromethyl)-3,4-dihydroquinazolin-2(1H)-one (3h).**

The title compound was prepared according to the general procedure (reaction time: 7 h) and purified by column chromatography on silica gel (petroleum ether/ethyl acetate = 3:1) to afford 23.1 mg (97%).  $[\alpha]_{\text{D}}^{25} = -7.0^\circ$  (c 0.5,  $\text{CH}_2\text{Cl}_2$ );  $^1\text{H}$  NMR (500 MHz,  $\text{CDCl}_3$ )  $\delta$  9.60 (s, 1H), 7.48 (s, 1H), 7.34 (d,  $J = 8.6$  Hz, 1H), 6.87 (d,  $J = 8.6$  Hz, 1H), 6.44 (s, 1H), 3.60 (dq,  $J = 14.2, 7.1$  Hz, 1H), 3.27 (dq,  $J = 14.3, 7.0$  Hz, 1H), 1.23 (t,  $J = 7.0$  Hz, 3H).  $^{13}\text{C}$  NMR (125 MHz,  $\text{CDCl}_3$ )  $\delta$  152.31, 135.35, 131.44, 127.90, 126.59, 122.06 (q,  $^1J = 285$  Hz), 116.04, 112.93, 85.98 (q,  $^2J = 32.5$  Hz), 58.88, 14.48. HRMS (ESI)  $m/z$  calcd for  $\text{C}_{11}\text{H}_{11}\text{ClF}_3\text{N}_2\text{O}_2$  ( $\text{M}+1$ ) $^+$  295.0461, found 295.0452. (Chiralpak AS-3R,  $\text{CH}_3\text{CN}/\text{H}_2\text{O} = 40/60$ , flow rate = 0.8 mL/min,  $\lambda = 254$  nm):  $t_{\text{minor}} = 8.662$  min,  $t_{\text{major}} = 10.050$  min, ee = 82%.

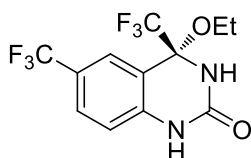

**(R)-4-ethoxy-4,6-bis(trifluoromethyl)-3,4-dihydroquinazolin-2(1H)-one (3i).** The title compound was prepared according to the general procedure (reaction time: 5 h) and purified by column chromatography on silica gel (petroleum ether/ethyl acetate = 3:1) to afford 34.6 mg (96%).  $[\alpha]_{\text{D}}^{25} = 8.7^\circ$  (c 0.5,  $\text{CH}_2\text{Cl}_2$ );  $^1\text{H}$  NMR (500 MHz, DMSO)  $\delta$  10.36 (s, 1H), 8.73 (s, 1H), 7.75 (d,  $J = 7.6$  Hz, 1H), 7.54 (s, 1H), 7.11 (d,  $J = 8.5$  Hz, 1H), 3.53 (dq,  $J = 14.2, 7.0$  Hz, 1H), 3.12 (dq,  $J = 14.1, 7.0$  Hz, 1H), 1.12 (t,  $J = 7.0$  Hz, 3H).  $^{13}\text{C}$  NMR (125 MHz, DMSO)  $\delta$  151.09, 142.51, 129.18, 125.56, 124.05, 115.91, 112.27, 86.22 (q,  $J = 31.2$  Hz), 59.03, 15.23. HRMS (ESI)  $m/z$  calcd for  $\text{C}_{12}\text{H}_{11}\text{F}_6\text{N}_2\text{O}_2$  ( $\text{M}+1$ ) $^+$  329.0725, found 329.0715. (Chiralpak AS-3R,  $\text{CH}_3\text{CN}/\text{H}_2\text{O} = 40/60$ , flow rate = 0.8 mL/min,  $\lambda = 254$  nm):  $t_{\text{minor}} = 7.278$  min,  $t_{\text{major}} = 8.158$  min, ee = 70%.

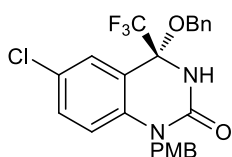

**(R)-4-(benzyloxy)-6-chloro-1-(4-methoxybenzyl)-4-(trifluoromethyl)-3,4-dihydro**

**quinazolin-2(1*H*)-one (3j).** The title compound was prepared according to the general procedure (reaction time: 3 h) and purified by column chromatography on silica gel (petroleum ether/ethyl acetate = 5:1) to afford 24.9 mg (97%).  $[\alpha]_D^{25} = -10.4^\circ$  (c 0.5, CH<sub>2</sub>Cl<sub>2</sub>); <sup>1</sup>H NMR (500 MHz, CDCl<sub>3</sub>) δ 7.59 (s, 1H), 7.46 – 7.24 (m, 6H), 7.19 (d, *J* = 8.3 Hz, 2H), 6.99 – 6.80 (m, 3H), 6.70 (s, 1H), 5.31 (d, *J* = 15.8 Hz, 1H), 5.05 (d, *J* = 16.0 Hz, 1H), 4.68 (d, *J* = 11.2 Hz, 1H), 4.34 (d, *J* = 11.2 Hz, 1H), 3.80 (s, 3H). <sup>13</sup>C NMR (125 MHz, CDCl<sub>3</sub>) δ 159.01, 151.89, 137.31, 136.18, 131.86, 128.58, 128.30, 128.13, 127.73, 127.64, 127.59, 127.44, 116.30, 115.21, 114.41, 85.62 (q, *J* = 32.5 Hz), 65.35, 55.29, 45.50. HRMS (ESI) *m/z* calcd for C<sub>24</sub>H<sub>21</sub>ClF<sub>3</sub>N<sub>2</sub>O<sub>3</sub> (M+1)<sup>+</sup> 477.1193, found 477.1178. (Chiralpak AS-3R, CH<sub>3</sub>CN/H<sub>2</sub>O = 70/30, flow rate = 0.8 mL/min, λ = 254 nm): *t*<sub>minor</sub> = 7.718 min, *t*<sub>major</sub> = 5.270 min, ee = 90%.

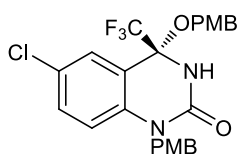

**(*R*)-6-chloro-1-(4-methoxybenzyl)-4-((4-methoxybenzyl)oxy)-4-(trifluoromethyl)-3,4-dihydroquinazolin-2(1*H*)-one (3k).** The title compound was prepared according to the general procedure (reaction time: 2 h) and purified by column chromatography on silica gel (petroleum ether/ethyl acetate = 8:1) to afford 33.1 mg (81%).  $[\alpha]_D^{25} = -14.8^\circ$  (c 0.5, CH<sub>2</sub>Cl<sub>2</sub>); <sup>1</sup>H NMR (500 MHz, CDCl<sub>3</sub>) δ 7.58 (s, 1H), 7.31 (d, *J* = 8.9 Hz, 1H), 7.23 (d, *J* = 8.4 Hz, 2H), 7.19 (d, *J* = 8.4 Hz, 2H), 6.96 – 6.78 (m, 6H), 5.29 (d, *J* = 16.1 Hz, 1H), 5.07 (d, *J* = 16.4 Hz, 1H), 4.61 (d, *J* = 10.8 Hz, 1H), 4.27 (d, *J* = 10.8 Hz, 1H), 3.84 – 3.75 (m, 6H). <sup>13</sup>C NMR (125 MHz, CDCl<sub>3</sub>) δ 159.10, 158.55, 151.60, 136.84, 131.33, 129.04, 127.81, 127.75, 127.32, 127.14, 127.06, 115.83, 114.96, 113.97, 113.54, 85.06 (q, *J* = 32.1 Hz), 64.76, 54.84, 45.06. HRMS (ESI) *m/z* calcd for C<sub>25</sub>H<sub>23</sub>ClF<sub>3</sub>N<sub>2</sub>O<sub>4</sub> (M+1)<sup>+</sup> 507.1298, found 507.1285. (Chiralpak AS-3R, CH<sub>3</sub>CN/H<sub>2</sub>O = 70/30, flow rate = 0.8 mL/min, λ = 254 nm): *t*<sub>minor</sub> = 6.843 min, *t*<sub>major</sub> = 5.231 min, ee = 94%.

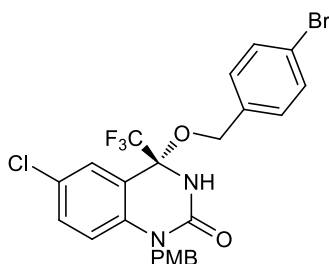

**(*R*)-4-((4-bromobenzyl)oxy)-6-chloro-1-(4-methoxybenzyl)-4-(trifluoromethyl)-3,4-dihydroquinazolin-2(1*H*)-one (3l).** The title compound was prepared according to the general procedure (reaction time: 13 h) and purified by column chromatography on silica gel (petroleum ether/ethyl acetate = 5:1) to afford 35.4 mg (80%).  $[\alpha]_D^{25} = -11.6^\circ$  (c 0.5, CH<sub>2</sub>Cl<sub>2</sub>); <sup>1</sup>H NMR (500 MHz, CDCl<sub>3</sub>) δ 7.54 (s, 1H), 7.41 (d, *J* = 8.0 Hz, 2H), 7.32 (d, *J* = 8.9 Hz, 1H), 7.21 – 7.14 (m, 4H), 7.07 (s, 1H), 6.92 – 6.85 (m,

3H), 5.26 (d,  $J = 16.0$  Hz, 1H), 5.06 (d,  $J = 15.9$  Hz, 1H), 4.62 (d,  $J = 11.4$  Hz, 1H), 4.27 (d,  $J = 11.4$  Hz, 1H), 3.79 (s, 3H).  $^{13}\text{C}$  NMR (125 MHz,  $\text{CDCl}_3$ )  $\delta$  158.60, 151.63, 136.81, 134.77, 131.49, 131.22, 128.87, 127.92, 127.18, 127.11, 126.91, 121.63, 115.92, 114.62, 113.99, 85.17 (q,  $J = 32.5$  Hz), 64.15, 54.85, 45.08. HRMS (ESI)  $m/z$  calcd for  $\text{C}_{24}\text{H}_{20}\text{BrClF}_3\text{N}_2\text{O}_3$  ( $\text{M}+1$ ) $^+$  555.0298, found 555.0284. (Chiralpak AS-3R,  $\text{CH}_3\text{CN}/\text{H}_2\text{O} = 80/20$ , flow rate = 0.8 mL/min,  $\lambda = 254$  nm):  $t_{\text{minor}} = 9.430$  min,  $t_{\text{major}} = 7.478$  min, ee = 89%.

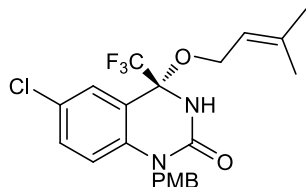

**(*R*)-6-chloro-1-(4-methoxybenzyl)-4-((3-methylbut-2-en-1-yl)oxy)-4-(trifluoromethyl)-3,4-dihydroquinazolin-2(*1H*)-one (3m).** The title compound was prepared according to the general procedure (reaction time: 5 h) and purified by column chromatography on silica gel (petroleum ether/ethyl acetate = 5:1) to afford 30.4 mg (80%).  $[\alpha]_{\text{D}}^{25} = -31.2^\circ$  (c 0.5,  $\text{CH}_2\text{Cl}_2$ );  $^1\text{H}$  NMR (500 MHz,  $\text{CDCl}_3$ )  $\delta$  7.54 (s, 1H), 7.32 – 7.26 (m, 1H), 7.17 (d,  $J = 8.6$  Hz, 2H), 6.87 (d,  $J = 8.5$  Hz, 3H), 6.35 (s, 1H), 5.44 – 5.21 (m, 2H), 5.01 (d,  $J = 16.3$  Hz, 1H), 4.12 (dd,  $J = 11.0, 7.1$  Hz, 1H), 3.89 – 3.65 (m, 4H), 1.75 (s, 3H), 1.58 (s, 3H).  $^{13}\text{C}$  NMR (125 MHz,  $\text{CDCl}_3$ )  $\delta$  158.96, 151.81, 138.65, 137.29, 131.66, 128.13, 127.78, 127.56, 127.48, 119.07, 116.16, 115.57, 114.37, 85.36 (q,  $J = 32.1$  Hz), 60.41, 55.27, 45.44, 25.81, 17.97. HRMS (ESI)  $m/z$  calcd for  $\text{C}_{22}\text{H}_{23}\text{ClF}_3\text{N}_2\text{O}_3$  ( $\text{M}+1$ ) $^+$  455.1349, found 455.1335. (Chiralpak OD-3R,  $\text{CH}_3\text{CN}/\text{H}_2\text{O} = 70/30$ , flow rate = 0.8 mL/min,  $\lambda = 254$  nm):  $t_{\text{minor}} = 7.083$  min,  $t_{\text{major}} = 5.077$  min, ee = 90%.

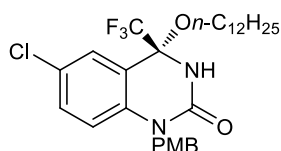

**(*R*)-6-chloro-4-(dodecyloxy)-1-(4-methoxybenzyl)-4-(trifluoromethyl)-3,4-dihydroquinazolin-2(*1H*)-one (3n).** The title compound was prepared according to the general procedure (reaction time: 4 h) and purified by column chromatography on silica gel (petroleum ether/ dichloromethane = 2:1) to afford 36.0 mg (79%).  $[\alpha]_{\text{D}}^{25} = -22.2^\circ$  (c 0.5,  $\text{CH}_2\text{Cl}_2$ );  $^1\text{H}$  NMR (500 MHz,  $\text{CDCl}_3$ )  $\delta$  7.50 (s, 1H), 7.35 – 7.22 (m, 1H), 7.16 (d,  $J = 8.6$  Hz, 2H), 6.92 – 6.78 (m, 3H), 6.34 (br, 1H), 5.29 (d,  $J = 16.3$  Hz, 1H), 5.01 (d,  $J = 16.3$  Hz, 1H), 3.79 (s, 3H), 3.64 – 3.52 (m, 1H), 3.30 – 3.12 (m, 1H), 1.67 – 1.56 (m, 2H), 1.38 – 1.22 (m, 19H), 0.90 (t,  $J = 6.9$  Hz, 3H).  $^{13}\text{C}$  NMR (125 MHz,  $\text{CDCl}_3$ )  $\delta$  158.51, 151.48, 136.80, 131.14, 127.65, 127.35, 127.10, 126.89, 115.71, 115.08, 113.91, 84.79 (q,  $J = 32.1$  Hz), 62.90, 54.81, 44.96, 31.49, 29.22, 29.20, 29.15, 29.09, 28.92, 28.89, 28.85, 25.56, 22.26, 13.69. HRMS (ESI)  $m/z$  calcd for  $\text{C}_{29}\text{H}_{39}\text{ClF}_3\text{N}_2\text{O}_3$  ( $\text{M}+1$ ) $^+$  555.2601, found 555.2590. (Chiralpak AS-3R,  $\text{CH}_3\text{CN}/\text{H}_2\text{O} = 70/30$ , flow rate = 0.8 mL/min,  $\lambda = 254$  nm):  $t_{\text{minor}} = 11.027$  min,  $t_{\text{major}} = 7.896$  min, ee = 94%.



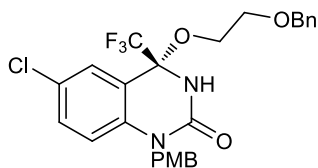

**(R)-4-(2-(benzyloxy)ethoxy)-6-chloro-1-(4-methoxybenzyl)-4-(trifluoromethyl)-3,4-dihydroquinazolin-2(1H)-one (3o).** The title compound was prepared according to the general procedure (reaction time: 5.5 h) and purified by column chromatography on silica gel (petroleum ether/ethyl acetate = 10:1) to afford 33.9 mg (80%).  $[\alpha]_D^{25} = -22.4^\circ$  (c 0.5,  $\text{CH}_2\text{Cl}_2$ );  $^1\text{H NMR}$  (500 MHz,  $\text{CDCl}_3$ )  $\delta$  7.57 (s, 1H), 7.42 – 7.34 (m, 4H), 7.35 – 7.23 (m, 2H), 7.15 (d,  $J = 7.8$  Hz, 2H), 6.98 – 6.76 (m, 3H), 6.56 (br, 1H), 5.28 (d,  $J = 16.2$  Hz, 1H), 4.99 (d,  $J = 16.3$  Hz, 1H), 4.60 (s, 2H), 3.79 (s, 4H), 3.67 (s, 2H), 3.56 – 3.44 (m, 1H).  $^{13}\text{C NMR}$  (125 MHz,  $\text{CDCl}_3$ )  $\delta$  158.50, 151.31, 151.20, 137.45, 136.84, 131.29, 128.04, 127.71, 127.36, 127.32, 127.21, 127.11, 115.69, 115.00, 113.92, 84.94 (q,  $J = 32.1$  Hz), 72.85, 67.84, 62.54, 54.82, 44.96. HRMS (ESI)  $m/z$  calcd for  $\text{C}_{26}\text{H}_{25}\text{ClF}_3\text{N}_2\text{O}_4$  ( $\text{M}+1$ ) $^+$  521.1455, found 521.1442. (Chiralpak AS-3R,  $\text{CH}_3\text{CN}/\text{H}_2\text{O} = 70/30$ , flow rate = 0.8 mL/min,  $\lambda = 254$  nm):  $t_{\text{minor}} = 6.387$  min,  $t_{\text{major}} = 4.924$  min, ee = 92%.

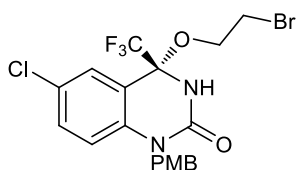

**(R)-4-(2-bromoethoxy)-6-chloro-1-(4-methoxybenzyl)-4-(trifluoromethyl)-3,4-dihydroquinazolin-2(1H)-one (3p).** The title compound was prepared according to the general procedure (reaction time: 4 h) and purified by column chromatography on silica gel (petroleum ether/ethyl acetate = 4:1) to afford 27.9 mg (93%).  $[\alpha]_D^{25} = -24.8^\circ$  (c 0.5, MeOH);  $^1\text{H NMR}$  (500 MHz,  $\text{CDCl}_3$ )  $\delta$  7.58 (s, 1H), 7.31 (d,  $J = 8.9$  Hz, 1H), 7.15 (d,  $J = 8.6$  Hz, 2H), 6.93 – 6.80 (m, 3H), 6.61 (s, 1H), 5.28 (d,  $J = 16.2$  Hz, 1H), 5.02 (d,  $J = 16.3$  Hz, 1H), 3.96 – 3.88 (m, 1H), 3.64 – 3.55 (m, 1H), 3.54 – 3.46 (m, 2H).  $^{13}\text{C NMR}$  (125 MHz,  $\text{CDCl}_3$ )  $\delta$  159.01, 151.68, 137.15, 132.02, 128.38, 127.58, 127.55, 127.45, 116.33, 114.74, 114.42, 85.36 (q,  $J = 32.5$  Hz), 63.24, 55.29, 45.47, 29.28. HRMS (ESI)  $m/z$  calcd for  $\text{C}_{19}\text{H}_{17}\text{BrClF}_3\text{N}_2\text{NaO}_3$  ( $\text{M}+\text{Na}$ ) $^+$  514.9961, found 514.9984. (Chiralpak AS-3R,  $\text{CH}_3\text{CN}/\text{H}_2\text{O} = 80/20$ , flow rate = 0.8 mL/min,  $\lambda = 254$  nm):  $t_{\text{minor}} = 4.049$  min,  $t_{\text{major}} = 3.405$  min, ee = 70%.

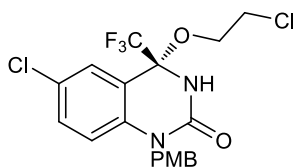

**(R)-6-chloro-4-(2-chloroethoxy)-1-(4-methoxybenzyl)-4-(trifluoromethyl)-3,4-dihydroquinazolin-2(1H)-one**

**ydroquinazolin-2(1H)-one (3q).** The title compound was prepared according to the general procedure (reaction time: 4 h) and purified by column chromatography on silica gel (petroleum ether/ethyl acetate = 3:1) to afford 29.1 mg (93%).  $[\alpha]_D^{25} = -31.3^\circ$  (c 0.4, MeOH);  $^1\text{H NMR}$  (500 MHz,  $\text{CDCl}_3$ )  $\delta$  7.55 (s, 1H), 7.29 (d,  $J = 8.9$  Hz, 1H), 7.14 (d,  $J = 8.6$  Hz, 2H), 6.95 – 6.84 (m, 3H), 6.78 (br, 1H), 5.26 (d,  $J = 16.2$  Hz, 1H), 5.00 (d,  $J = 16.3$  Hz, 1H), 3.90 – 3.81 (m, 1H), 3.77 (s, 3H), 3.65 (t,  $J = 5.7$  Hz, 2H), 3.57 – 3.47 (m, 1H).  $^{13}\text{C NMR}$  (125 MHz,  $\text{CDCl}_3$ )  $\delta$  158.56, 151.37, 136.73, 131.54, 127.93, 127.18, 127.12, 127.01, 115.87, 114.36, 113.97, 84.94 (q,  $J = 32.9$  Hz), 63.00, 54.84, 45.02, 41.58. HRMS (ESI)  $m/z$  calcd for  $\text{C}_{19}\text{H}_{18}\text{Cl}_2\text{F}_3\text{N}_2\text{NaO}_3$  ( $\text{M}+\text{Na}$ ) $^+$  471.0466, found 471.0450. (Chiralpak AS-3R,  $\text{CH}_3\text{CN}/\text{H}_2\text{O} = 80/20$ , flow rate = 0.8 mL/min,  $\lambda = 254$  nm):  $t_{\text{minor}} = 3.827$  min,  $t_{\text{major}} = 3.250$  min, ee = 87%.

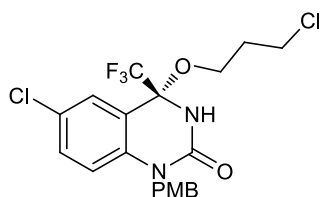

**(R)-6-chloro-4-(3-chloropropoxy)-1-(4-methoxybenzyl)-4-(trifluoromethyl)-3,4-dihydroquinazolin-2(1H)-one (3r).** The title compound was prepared according to the general procedure (reaction time: 3 h) and purified by column chromatography on silica gel (petroleum ether/ethyl acetate = 5:1) to afford 31.9 mg (92%).  $[\alpha]_D^{25} = -35.8^\circ$  (c 0.5,  $\text{CH}_2\text{Cl}_2$ );  $^1\text{H NMR}$  (500 MHz,  $\text{CDCl}_3$ )  $\delta$  7.51 (s, 1H), 7.30 (d,  $J = 8.9$  Hz, 2H), 7.16 (d,  $J = 8.5$  Hz, 2H), 6.95 (s, 1H), 6.88 (d,  $J = 8.7$  Hz, 3H), 5.29 (d,  $J = 16.1$  Hz, 1H), 5.03 (d,  $J = 16.3$  Hz, 1H), 3.84 – 3.74 (m, 4H), 3.68 (t,  $J = 6.2$  Hz, 2H), 3.39 (dt,  $J = 9.4, 5.7$  Hz, 1H), 2.13 – 2.02 (m, 2H).  $^{13}\text{C NMR}$  (125 MHz,  $\text{CDCl}_3$ )  $\delta$  158.97, 152.06, 137.21, 131.77, 128.24, 127.75, 127.55, 127.32, 116.26, 115.00, 114.38, 85.24 (q,  $J = 32.5$  Hz), 59.32, 55.28, 45.40, 41.28, 31.90. HRMS (ESI)  $m/z$  calcd for  $\text{C}_{20}\text{H}_{20}\text{Cl}_2\text{F}_3\text{N}_2\text{O}_3$  ( $\text{M}+1$ ) $^+$  463.0803, found 463.0788. (Chiralpak AS-3R,  $\text{CH}_3\text{CN}/\text{H}_2\text{O} = 80/20$ , flow rate = 0.8 mL/min,  $\lambda = 254$  nm):  $t_{\text{minor}} = 10.531$  min,  $t_{\text{major}} = 7.821$  min, ee = 95%.

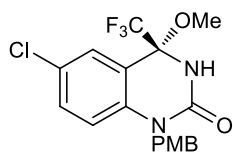

**(R)-6-chloro-4-methoxy-1-(4-methoxybenzyl)-4-(trifluoromethyl)-3,4-dihydroquinazolin-2(1H)-one (3s).** The title compound was prepared according to the general procedure (reaction time: 3 h) and purified by column chromatography on silica gel (petroleum ether/ethyl acetate = 5:1) to afford 37.2 mg (98%)  $[\alpha]_D^{25} = -21.5^\circ$  (c 0.5,  $\text{CH}_2\text{Cl}_2$ ).  $^1\text{H NMR}$  (500 MHz,  $\text{CDCl}_3$ )  $\delta$  7.48 (s, 1H), 7.27 (d,  $J = 8.9$  Hz, 1H), 7.14 (d,  $J = 8.6$  Hz, 2H), 6.88 – 6.82 (m, 3H), 6.42 (s, 1H), 5.26 (d,  $J = 16.3$  Hz, 1H), 5.01 (d,  $J = 16.3$  Hz, 1H), 3.77 (s, 3H), 3.26 (s, 3H).  $^{13}\text{C NMR}$  (125 MHz,  $\text{CDCl}_3$ )  $\delta$  158.52, 151.52, 137.00, 131.34, 127.79, 127.27, 127.09, 126.88, 115.82, 114.23, 113.93, 85.25 (q,  $J = 32.1$  Hz), 54.82, 49.95, 44.98. HRMS (ESI)  $m/z$  calcd for  $\text{C}_{18}\text{H}_{17}\text{ClF}_3\text{N}_2\text{O}_3$  ( $\text{M}+1$ ) $^+$  401.0880, found 401.0868. (Chiralpak AS-3R,  $\text{CH}_3\text{CN}/\text{H}_2\text{O}$

= 60/40, flow rate = 0.8 mL/min,  $\lambda$  = 254 nm):  $t_{\text{minor}}$  = 8.101 min,  $t_{\text{major}}$  = 5.700 min, ee = 92%.

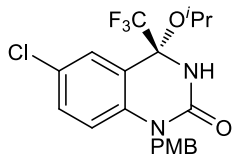

**(R)-6-chloro-4-isopropoxy-1-(4-methoxybenzyl)-4-(trifluoromethyl)-3,4-dihydroquinazolin-2(1H)-one (3t).** The title compound was prepared according to the general procedure (reaction time: 21 h) and purified by column chromatography on silica gel (petroleum ether/ethyl acetate = 5:1) to afford 15.4 mg (67%).  $[\alpha]_{\text{D}}^{25} = -38.0^{\circ}$  (c 0.5,  $\text{CH}_2\text{Cl}_2$ );  $^1\text{H}$  NMR (500 MHz,  $\text{CDCl}_3$ )  $\delta$  7.54 (s, 1H), 7.31 – 7.22 (m, 2H), 7.14 (d,  $J$  = 8.6 Hz, 2H), 6.92 – 6.80 (m, 3H), 6.35 (s, 1H), 5.27 (d,  $J$  = 16.3 Hz, 1H), 5.00 (d,  $J$  = 16.3 Hz, 1H), 3.93 – 3.85 (m, 1H), 3.77 (s, 3H), 1.28 (d,  $J$  = 6.1 Hz, 3H), 1.09 (d,  $J$  = 6.2 Hz, 3H).  $^{13}\text{C}$  NMR (125 MHz,  $\text{CDCl}_3$ )  $\delta$  158.97, 151.55, 137.08, 131.60, 127.92, 127.83, 127.78, 127.56, 116.43, 116.08, 114.37, 86.65 (q,  $J$  = 32.1 Hz), 67.83, 55.28, 45.42, 24.40, 23.69. HRMS (ESI)  $m/z$  calcd for  $\text{C}_{20}\text{H}_{21}\text{ClF}_3\text{N}_2\text{O}_3$  ( $\text{M}+1$ ) $^+$  429.1193, found 429.1179. (Chiralpak AS-3R,  $\text{CH}_3\text{CN}/\text{H}_2\text{O}$  = 70/30, flow rate = 0.8 mL/min,  $\lambda$  = 254 nm):  $t_{\text{minor}}$  = 5.205 min,  $t_{\text{major}}$  = 4.467min, ee = 93%.

## General Procedure for Synthesis of Compounds 4

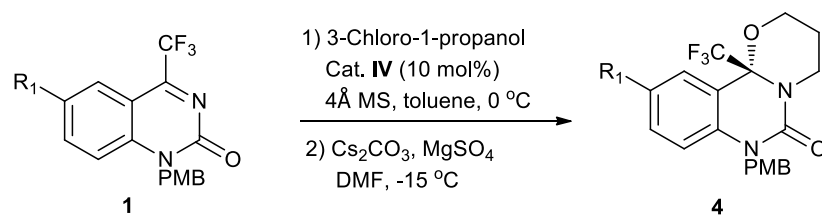

An oven-dried 10-mL round bottom flask was charged with ketimines **1** (0.081 mmol), catalyst **IV** (10 mol%) and 4Å MS (100 mg). The flask was capped and backfilled with argon. Toluene was added via syringe. The mixture was cooled to 0 °C and then 3-chloro-1-propanol (0.122 mmol) was added. The reaction mixture was maintained at 0 °C until ketimines **1** had been completely consumed as determined by TLC. The reaction was purified via flash chromatography on silica gel (eluting with petroleum ether/ethyl acetate = 5:1) to give compound **1-1**.

Compound **1-1**, MgSO<sub>4</sub> (100 mg) and DMF (0.5 mL) were loaded into a 10 mL flask. The reaction solution was cooled to -15 °C under argon. After being stirred for 1 h, Cs<sub>2</sub>CO<sub>3</sub> (0.243 mmol) was added quickly. After completion of the reaction which was determined by TLC, the reaction was purified via flash chromatography on silica gel (eluting with petroleum ether/ethyl acetate = 5:1) to give compound **4**.

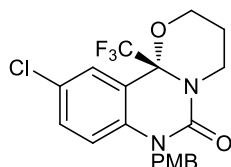

**(R)-10-chloro-7-(4-methoxybenzyl)-11b-(trifluoromethyl)-3,4,7,11b-tetrahydro-[1,3]oxazino[3,2-c]quinazolin-6(2H)-one (4a)**. The title compound was prepared according to the general procedure and purified by column chromatography on silica gel (petroleum ether/ethyl acetate = 5:1) to afford 28.2 mg (96%).  $[\alpha]_D^{25} = -15.8^\circ$  (c 0.5, CH<sub>2</sub>Cl<sub>2</sub>); <sup>1</sup>H NMR (500 MHz, CDCl<sub>3</sub>) δ 7.56 (d, *J* = 1.7 Hz, 1H), 7.24 (dd, *J* = 8.8, 2.5 Hz, 1H), 7.16 (d, *J* = 8.6 Hz, 2H), 6.86 (d, *J* = 8.7 Hz, 2H), 6.79 (d, *J* = 8.8 Hz, 1H), 5.20 (d, *J* = 16.4 Hz, 1H), 5.04 (d, *J* = 16.4 Hz, 1H), 4.61 – 4.42 (m, 1H), 4.29 – 4.15 (m, 1H), 4.08 – 3.98 (m, 1H), 3.79 (s, 3H), 3.59 – 3.45 (m, 1H), 2.12 – 2.01 (m, 1H), 2.00 – 1.88 (m, 1H). <sup>13</sup>C NMR (125 MHz, CDCl<sub>3</sub>) δ 158.84, 151.96, 136.01, 130.98, 128.32, 127.79, 127.67, 126.61, 118.85, 115.35, 114.23, 83.45 (q, *J* = 31.7 Hz), 61.79, 55.26, 46.62, 37.43, 23.35. HRMS (ESI) *m/z* calcd for C<sub>20</sub>H<sub>19</sub>ClF<sub>3</sub>N<sub>2</sub>O<sub>3</sub> (M+1)<sup>+</sup> 427.1036, found 427.1023. (Chiralpak AS-3R, CH<sub>3</sub>CN/H<sub>2</sub>O = 80/20, flow rate = 0.8 mL/min, λ = 254 nm): *t*<sub>minor</sub> = 4.642 min, *t*<sub>major</sub> = 3.821 min, ee = 94%.

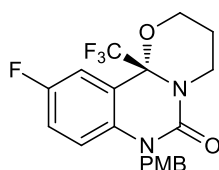

**(R)-10-fluoro-7-(4-methoxybenzyl)-11b-(trifluoromethyl)-3,4,7,11b-tetrahydro-[1,3]oxazino[3,2-c]quinazolin-6(2H)-one (4b).** The title compound was prepared according to the general procedure and purified by column chromatography on silica gel (petroleum ether/ethyl acetate = 5:1) to afford 36.0 mg (99%).  $[\alpha]_{\text{D}}^{20} = -11.4^{\circ}$  (c 0.5,  $\text{CH}_2\text{Cl}_2$ );  $^1\text{H}$  NMR (400 MHz,  $\text{CDCl}_3$ )  $\delta$  7.28 (dd,  $J = 8.6, 2.3$  Hz, 1H), 7.15 (d,  $J = 8.5$  Hz, 2H), 6.98 (td,  $J = 8.5, 2.9$  Hz, 1H), 6.84 (d,  $J = 8.5$  Hz, 2H), 6.78 (dd,  $J = 9.1, 4.3$  Hz, 1H), 5.17 (d,  $J = 16.4$  Hz, 1H), 5.03 (d,  $J = 16.4$  Hz, 1H), 4.63 – 4.40 (m, 1H), 4.29 – 4.10 (m, 1H), 4.10 – 3.90 (m, 1H), 3.77 (s, 3H), 3.59 – 3.41 (m, 1H), 2.13 – 1.87 (m, 2H).  $^{13}\text{C}$  NMR (100 MHz,  $\text{CDCl}_3$ )  $\delta$  158.79, 152.09, 133.66 (d,  $J = 2.0$  Hz), 128.51, 127.67, 124.45 (q,  $J = 295$  Hz), 118.89 (d,  $J = 8.0$  Hz), 118.91 (d,  $J = 22.0$  Hz), 115.37 (d,  $J = 8.0$  Hz), 114.21, 113.60 (d,  $J = 25.0$  Hz), 83.42 (q,  $J = 31.2$  Hz), 61.81, 55.26, 46.75, 37.39, 23.38. HRMS (ESI)  $m/z$  calcd for  $\text{C}_{20}\text{H}_{19}\text{F}_4\text{N}_2\text{O}_3$  ( $\text{M}+1$ )<sup>+</sup> 411.1332, found 411.1326. (Chiralpak AS-3R,  $\text{CH}_3\text{CN}/\text{H}_2\text{O} = 70/30$ , flow rate = 0.8 mL/min,  $\lambda = 254$  nm):  $t_{\text{minor}} = 5.862$  min,  $t_{\text{major}} = 4.470$  min, ee = 96%.

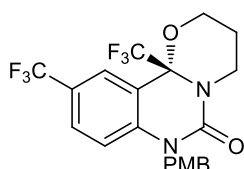

**(R)-7-(4-methoxybenzyl)-10,11b-bis(trifluoromethyl)-3,4,7,11b-tetrahydro-[1,3]oxazino[3,2-c]quinazolin-6(2H)-one (4c).** The title compound was prepared according to the general procedure (reaction time: 3 h) and purified by column chromatography on silica gel (petroleum ether/ethyl acetate = 5:1) to afford 32.4 mg (94%).  $[\alpha]_{\text{D}}^{20} = 1.8^{\circ}$  (c 0.5,  $\text{CH}_2\text{Cl}_2$ );  $^1\text{H}$  NMR (400 MHz,  $\text{CDCl}_3$ )  $\delta$  7.82 (s, 1H), 7.52 (d,  $J = 8.6$  Hz, 1H), 7.16 (d,  $J = 8.4$  Hz, 2H), 6.93 (d,  $J = 8.7$  Hz, 1H), 6.85 (d,  $J = 8.5$  Hz, 2H), 5.22 (d,  $J = 16.4$  Hz, 1H), 5.08 (d,  $J = 16.4$  Hz, 1H), 4.62 – 4.44 (m, 1H), 4.31 – 4.15 (m, 1H), 4.12 – 3.98 (m, 1H), 3.77 (s, 3H), 3.62 – 3.45 (m, 1H), 2.16 – 1.88 (m, 2H).  $^{13}\text{C}$  NMR (100 MHz,  $\text{CDCl}_3$ )  $\delta$  158.91, 151.83, 140.04, 128.13, 128.00, 127.68, 124.58 (q,  $J = 33.3$  Hz), 124.23, 117.76, 114.29, 114.19, 83.31 (q,  $J = 31.1$  Hz), 61.99, 55.27, 46.70, 37.64, 23.27. HRMS (ESI)  $m/z$  calcd for  $\text{C}_{21}\text{H}_{19}\text{F}_6\text{N}_2\text{O}_3$  ( $\text{M}+1$ )<sup>+</sup> 461.1300, found 461.1292 (Chiralpak AS-3R,  $\text{CH}_3\text{CN}/\text{H}_2\text{O} = 70/30$ , flow rate = 0.8 mL/min,  $\lambda = 254$  nm):  $t_{\text{minor}} = 5.232$  min,  $t_{\text{major}} = 4.420$  min, ee = 94%.

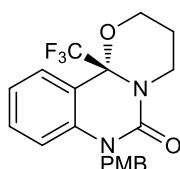

**(R)-7-(4-methoxybenzyl)-11b-(trifluoromethyl)-3,4,7,11b-tetrahydro-[1,3]oxazino[3,2-c]quinazolin-6(2H)-one (4d).** The title compound was prepared according to the general procedure (reaction time: 3 h) and purified by column chromatography on silica gel (petroleum ether/ethyl acetate = 5:1) to afford 35.0 mg (95%).  $[\alpha]_{\text{D}}^{20} = -8.8^{\circ}$

(c 0.5, CH<sub>2</sub>Cl<sub>2</sub>); <sup>1</sup>H NMR (400 MHz, CDCl<sub>3</sub>) δ 7.56 (d, *J* = 7.8 Hz, 1H), 7.32 – 7.23 (m, 1H), 7.17 (d, *J* = 8.5 Hz, 2H), 7.06 (t, *J* = 7.6 Hz, 1H), 6.91 – 6.70 (m, 3H), 5.18 (d, *J* = 16.4 Hz, 1H), 5.06 (d, *J* = 16.4 Hz, 1H), 4.62 – 4.39 (m, 1H), 4.28 – 4.12 (m, 1H), 4.08 – 3.91 (m, 1H), 3.76 (s, 3H), 3.60 – 3.44 (m, 1H), 2.14 – 1.86 (m, 2H). <sup>13</sup>C NMR (100 MHz, CDCl<sub>3</sub>) δ 158.70, 152.27, 137.37, 131.00, 128.85, 127.69, 126.61, 124.51 (q, *J* = 294.0 Hz), 122.35, 117.23, 114.14, 113.94, 83.90 (q, *J* = 31.0 Hz), 61.54, 55.25, 46.49, 37.26, 23.47. HRMS (ESI) *m/z* calcd for C<sub>20</sub>H<sub>20</sub>F<sub>3</sub>N<sub>2</sub>O<sub>3</sub> (M+1)<sup>+</sup> 393.1426, found 393.1420. (Chiralpak AS-3R, CH<sub>3</sub>CN/H<sub>2</sub>O = 70/30, flow rate = 0.8 mL/min, λ = 254 nm): *t*<sub>minor</sub> = 6.149 min, *t*<sub>major</sub> = 4.539 min, ee = 87%.

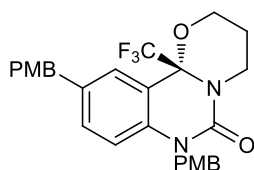

**(*R*)-7,10-bis(4-methoxybenzyl)-11b-(trifluoromethyl)-3,4,7,11b-tetrahydro-[1,3]oxazino[3,2-*c*]quinazolin-6(2*H*)-one (4e).** The title compound was prepared according to the general procedure (reaction time: 3 h) and purified by column chromatography on silica gel (petroleum ether/ethyl acetate = 5:1) to afford 33.9 mg (96%). [ $\alpha$ ]<sub>D</sub><sup>20</sup> = –11.8° (c 0.5, CH<sub>2</sub>Cl<sub>2</sub>); <sup>1</sup>H NMR (400 MHz, CDCl<sub>3</sub>) δ 7.40 (s, 1H), 7.15 (d, *J* = 8.4 Hz, 2H), 7.09 – 6.96 (m, 3H), 6.89 – 6.78 (m, 4H), 6.74 (d, *J* = 8.5 Hz, 1H), 5.13 (d, *J* = 16.3 Hz, 1H), 5.03 (d, *J* = 16.3 Hz, 1H), 4.58 – 4.45 (m, 1H), 4.25 – 4.10 (m, 1H), 4.06 – 3.93 (m, 1H), 3.86 (s, 2H), 3.77 (s, 3H), 3.75 (s, 3H), 3.57 – 3.43 (m, 1H), 2.12 – 1.85 (m, 2H). <sup>13</sup>C NMR (100 MHz, CDCl<sub>3</sub>) δ 158.67, 158.03, 152.29, 135.75, 135.51, 132.70, 131.30, 129.80, 128.97, 127.71, 126.67, 117.11, 114.11, 114.08, 113.91, 83.86 (q, *J* = 31.0 Hz), 61.59, 55.26, 46.53, 40.16, 37.30, 23.47. HRMS (ESI) *m/z* calcd for C<sub>28</sub>H<sub>28</sub>F<sub>3</sub>N<sub>2</sub>O<sub>4</sub> (M+1)<sup>+</sup> 513.2001, found 513.1996. (Chiralpak AS-3R, CH<sub>3</sub>CN/H<sub>2</sub>O = 70/30, flow rate = 0.8 mL/min, λ = 254 nm): *t*<sub>minor</sub> = 8.389 min, *t*<sub>major</sub> = 5.812 min, ee = 87%.

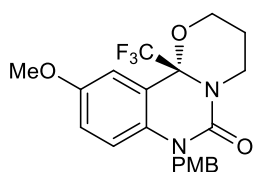

**(*R*)-10-methoxy-7-(4-methoxybenzyl)-11b-(trifluoromethyl)-3,4,7,11b-tetrahydro-[1,3]oxazino[3,2-*c*]quinazolin-6(2*H*)-one (4f).** The title compound was prepared according to the general procedure (reaction time: 3 h) and purified by column chromatography on silica gel (petroleum ether/ethyl acetate = 5:1) to afford 33.6 mg (94%). [ $\alpha$ ]<sub>D</sub><sup>20</sup> = –16.4° (c 0.5, CH<sub>2</sub>Cl<sub>2</sub>); <sup>1</sup>H NMR (400 MHz, CDCl<sub>3</sub>) δ 7.16 (d, *J* = 8.4 Hz, 2H), 7.10 (s, 1H), 6.83 (d, *J* = 8.5 Hz, 3H), 6.76 (d, *J* = 9.0 Hz, 1H), 5.16 (d, *J* = 16.4 Hz, 1H), 5.02 (d, *J* = 16.4 Hz, 1H), 4.58 – 4.46 (m, 1H), 4.24 – 4.13 (m, 1H), 4.06 – 3.95 (m, 1H), 3.76 (s, 6H), 3.57 – 3.44 (m, 1H), 2.10 – 1.87 (m, 2H). <sup>13</sup>C NMR (100 MHz, CDCl<sub>3</sub>) δ 158.68, 155.02, 152.28, 131.05, 128.98, 127.69, 124.50 (q, *J* =

295.0 Hz), 118.26, 117.03, 115.16, 114.12, 111.34, 83.86 (q,  $J = 31.0$  Hz), 61.59, 55.67, 55.25, 46.56, 37.23, 23.51. HRMS (ESI)  $m/z$  calcd for  $C_{21}H_{22}F_3N_2O_4$  ( $M+1$ )<sup>+</sup> 423.1532, found 423.1526. (Chiralpak AS-3R,  $CH_3CN/H_2O = 70/30$ , flow rate = 0.8 mL/min,  $\lambda = 254$  nm):  $t_{minor} = 5.910$  min,  $t_{major} = 4.375$  min, ee = 76%.

## References

1. H. Xie, Y. Zhang, S. Zhang, X. Chen and W. Wang, *Angew. Chem., Int. Ed.*, 2011, **50**, 11773.
2. K. L. Kimmel, M. T. Robak and J. A. Ellman, *J. Am. Chem. Soc.*, 2009, **131**, 8754.
3. K. F. Zhang, J. Nie, R. Guo, Y. Zheng and J. A. Ma, *Adv. Synth. Catal.*, 2013, **355**, 3497.
4. H. Xie, A. Song, X. Zhang, X. Chen, H. Li, C. Sheng and W. Wang, *Chem. Commun.*, 2013, **49**, 928.

# $^1\text{H}$ and $^{13}\text{C}$ -NMR spectra

## Compound 3a

ZBB-YXT-187  
ZBB-YXT-187

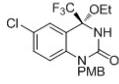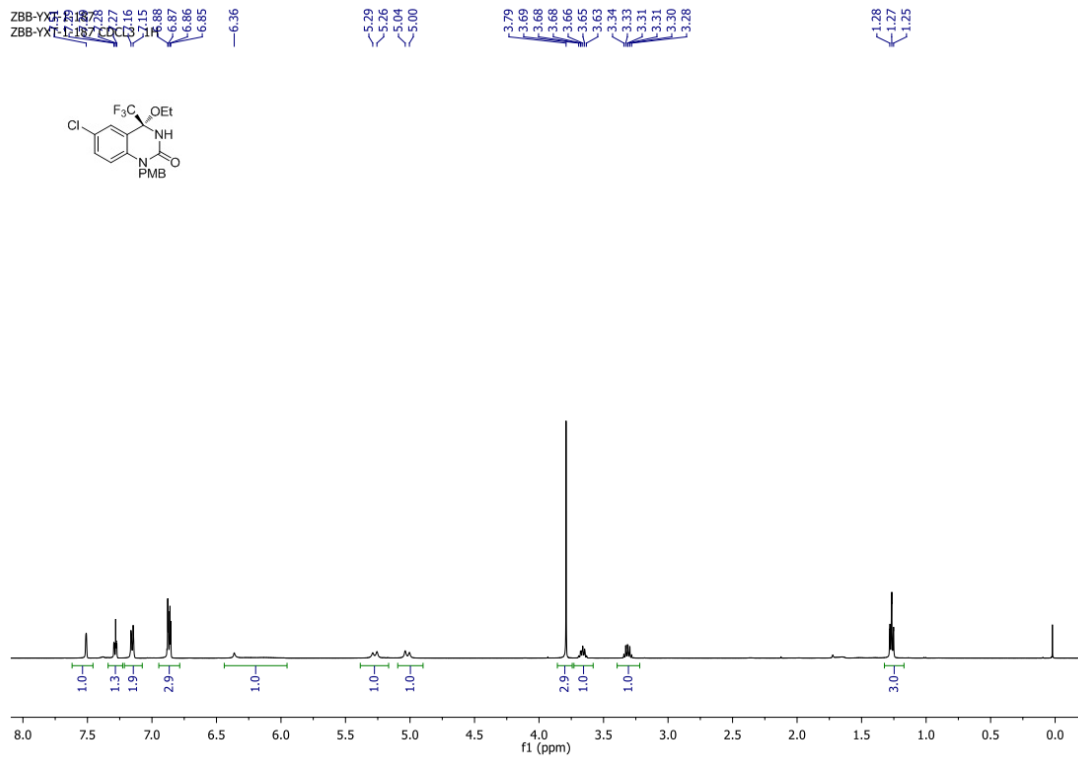

ZBB-YXT-187  
ZBB-YXT-187

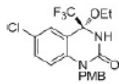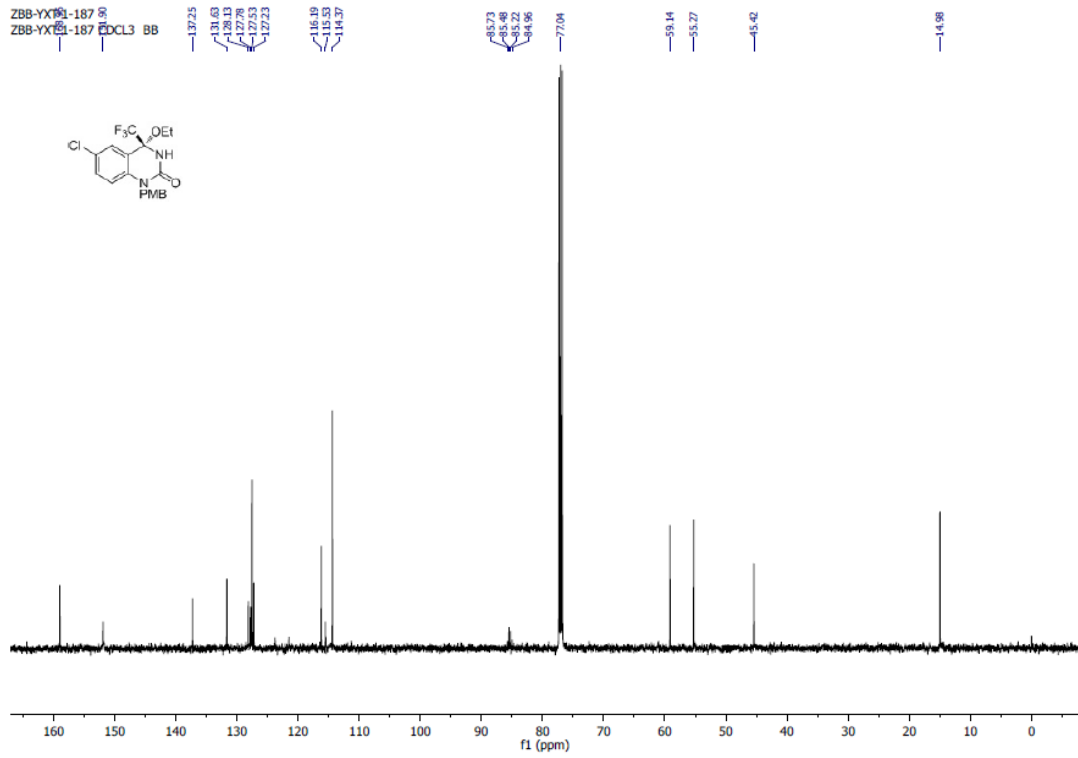



# Compound 3b

ZBB-YXT-1-178  
 ZBB-YXT-1-178 CDCl<sub>3</sub> 1H

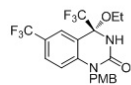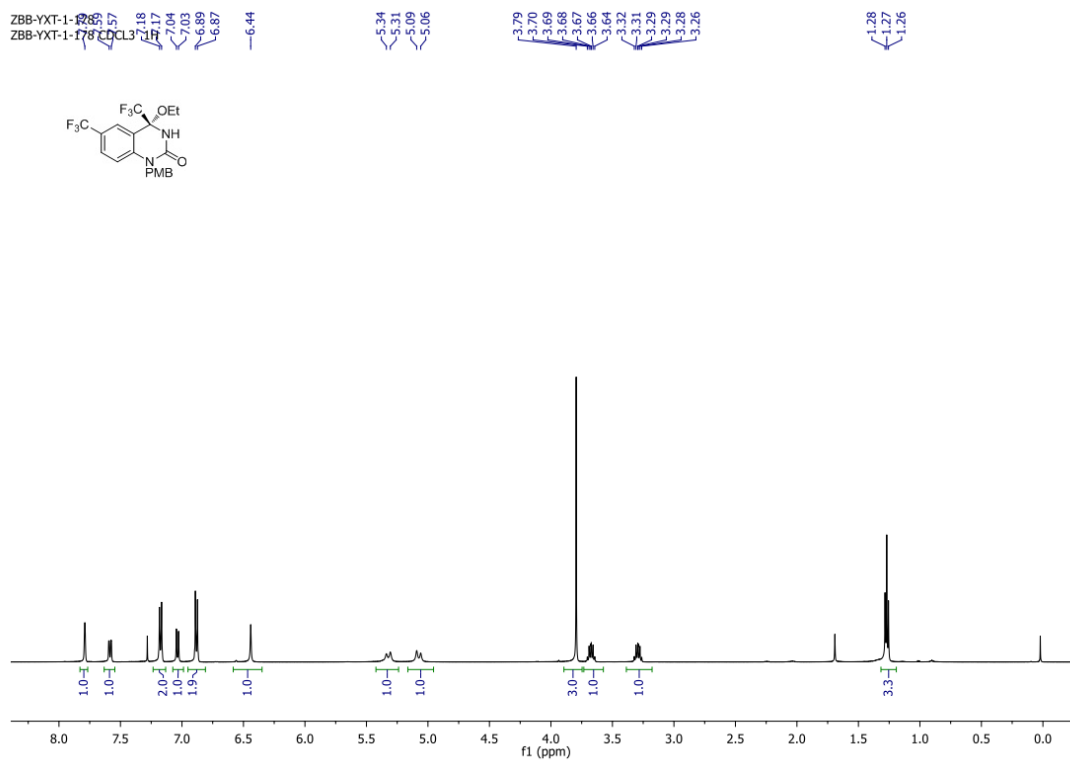

ZBB-YXT-1-178  
 ZBB-YXT-1-178 CDCl<sub>3</sub> 13C

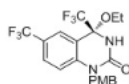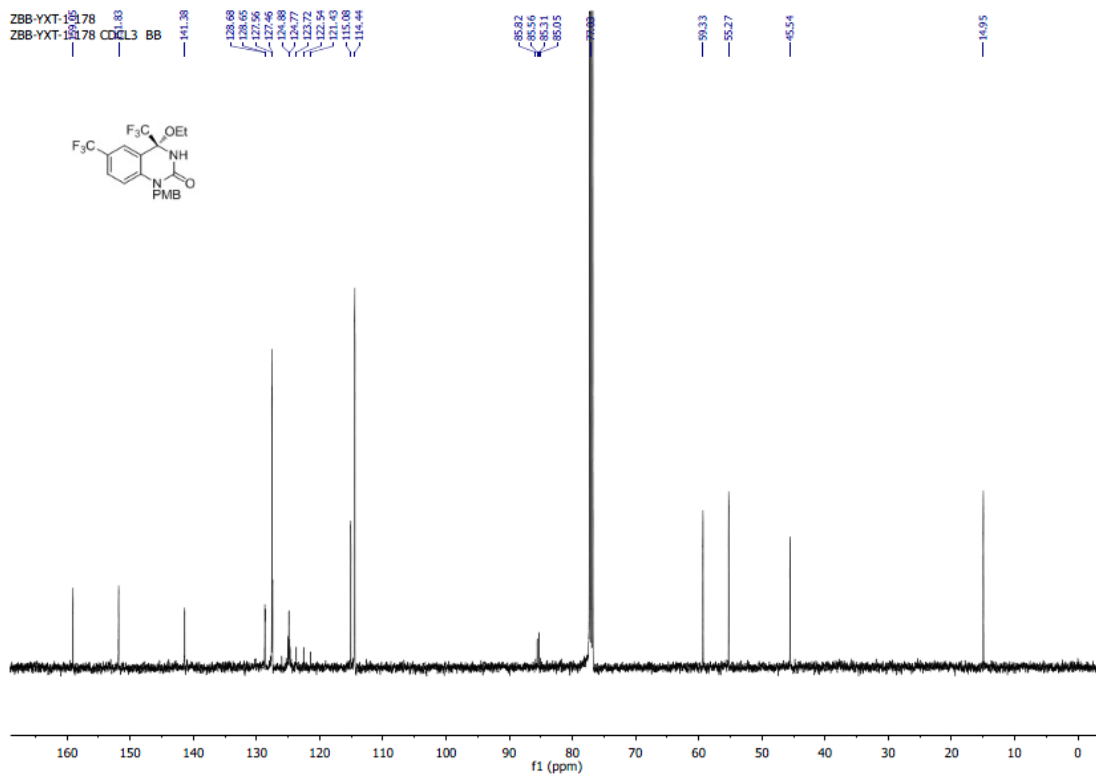

# Compound 3c

ZBB-YXT-177 CDCl<sub>3</sub> 1H  
 ZBB-YXT-177 CDCl<sub>3</sub> 1H  
 6.25

5.29  
 5.26  
 5.05  
 5.01

3.79  
 3.70  
 3.69  
 3.67  
 3.66  
 3.64  
 3.33  
 3.32  
 3.31  
 3.29  
 3.28

1.27  
 1.26  
 1.24

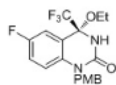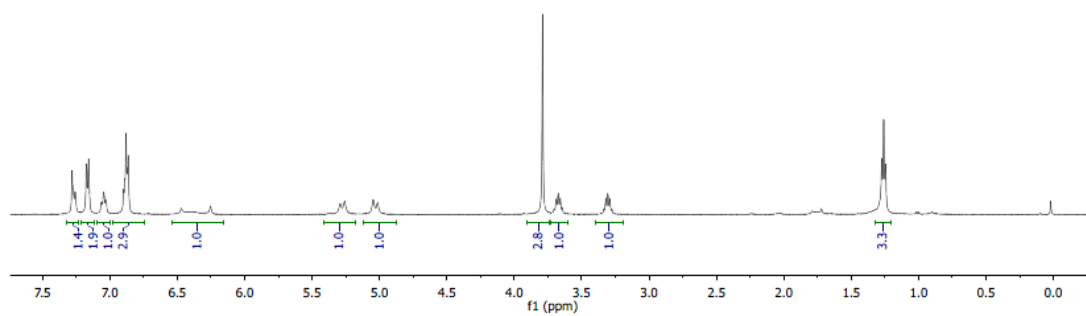

ZBB-YXT-177 CDCl<sub>3</sub> 13C-BB  
 ZBB-YXT-177 CDCl<sub>3</sub> 13C-BB  
 134.90

127.53  
 127.10  
 118.31  
 118.14  
 115.86  
 115.82  
 115.10  
 115.04  
 113.90  
 113.79  
 113.60

85.31  
 84.80  
 84.55  
 76.85  
 76.60  
 76.34

58.63  
 54.81

45.07

14.51

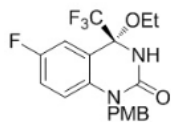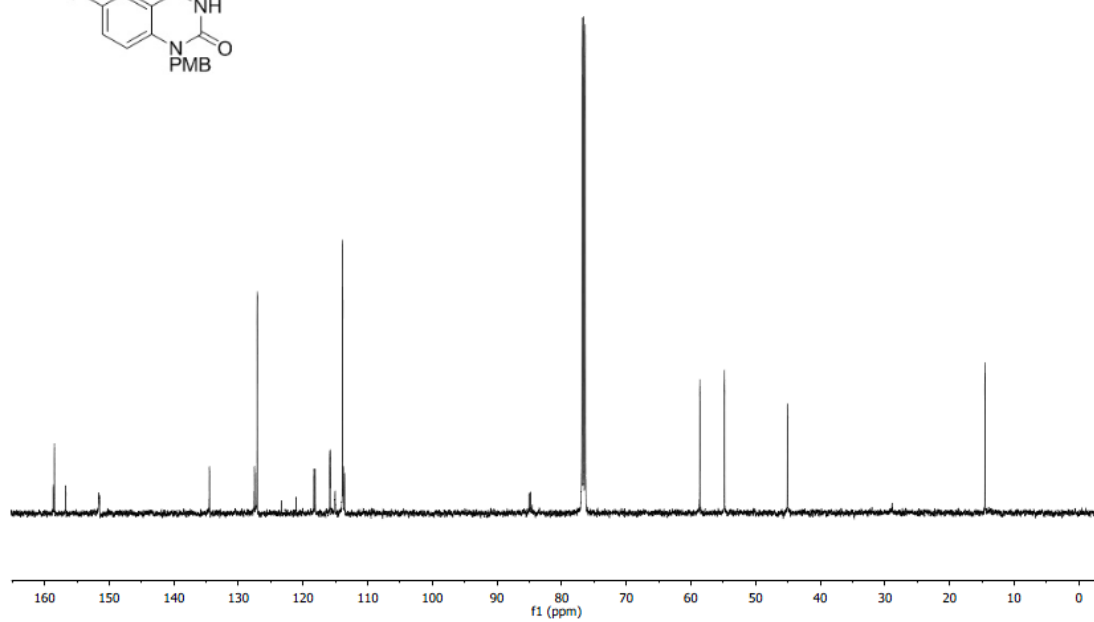

# Compound 3d

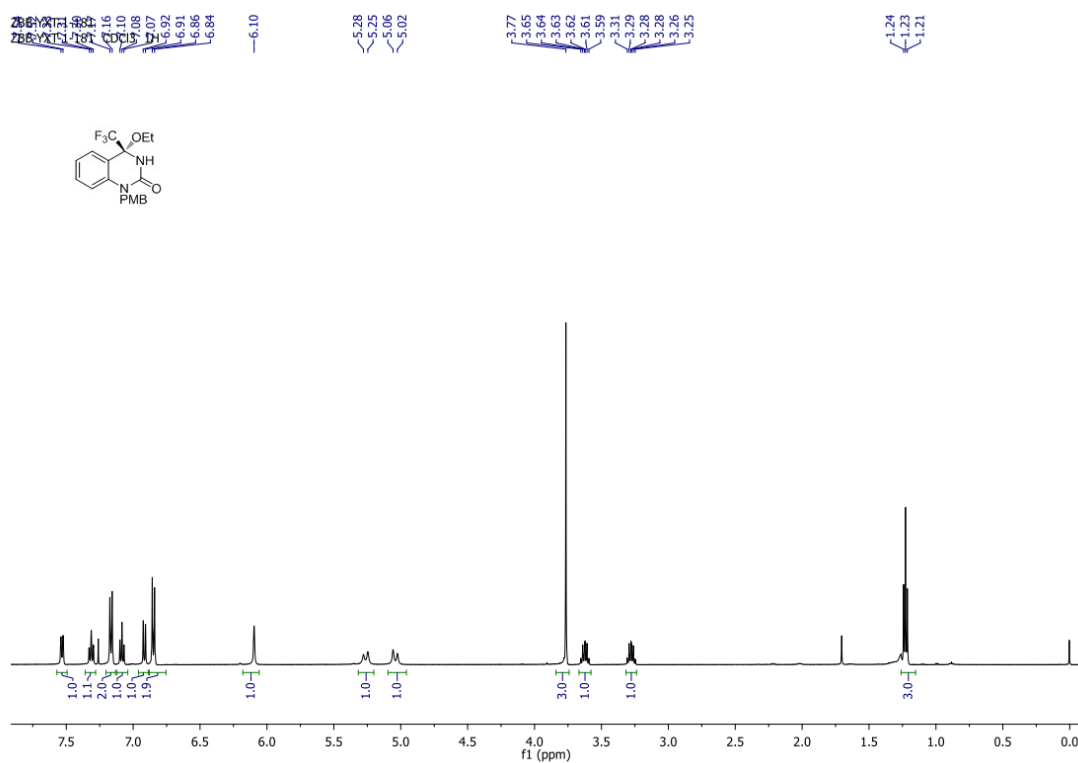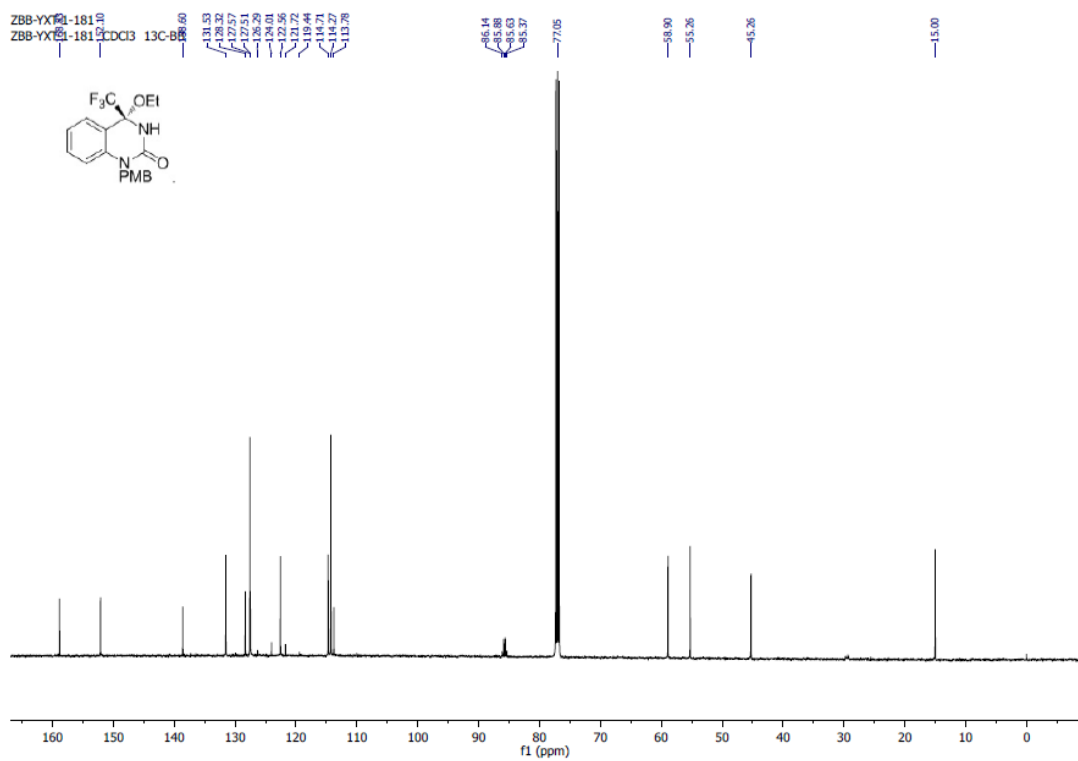

# Compound 3e

ZBB-YXT-61294  
 ZBB-YXT-61294 CDCl<sub>3</sub> BB

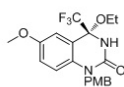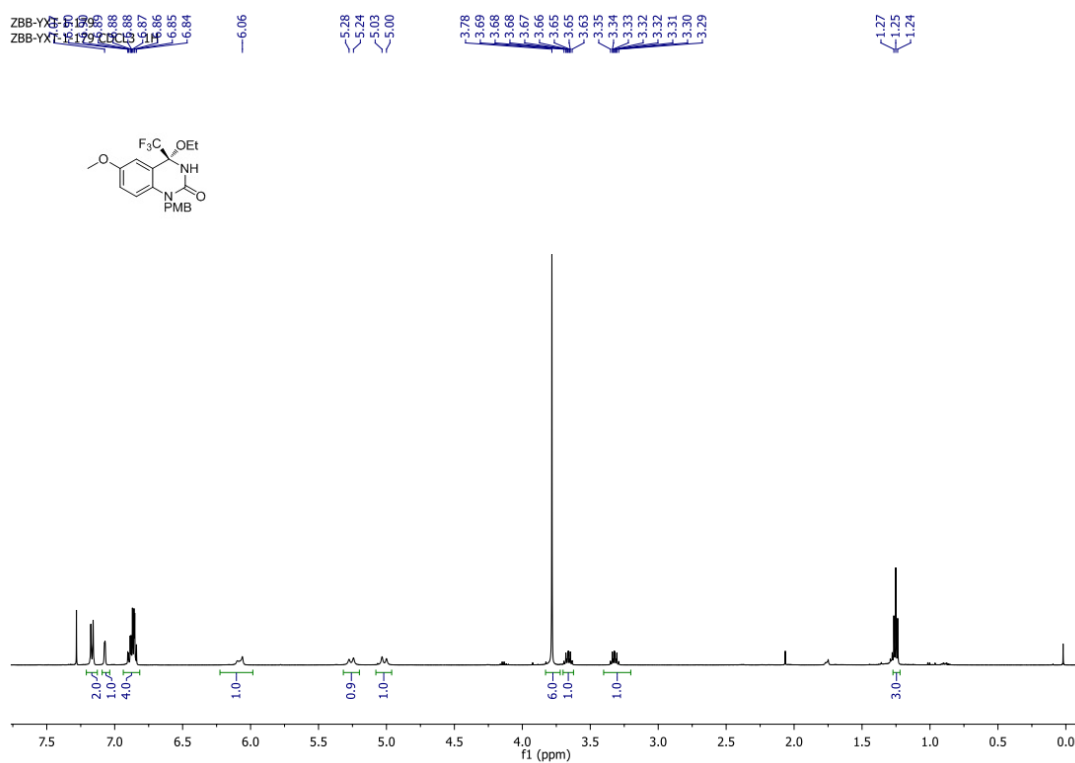

ZBB-YXT-61294  
 ZBB-YXT-61294 CDCl<sub>3</sub> BB

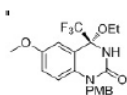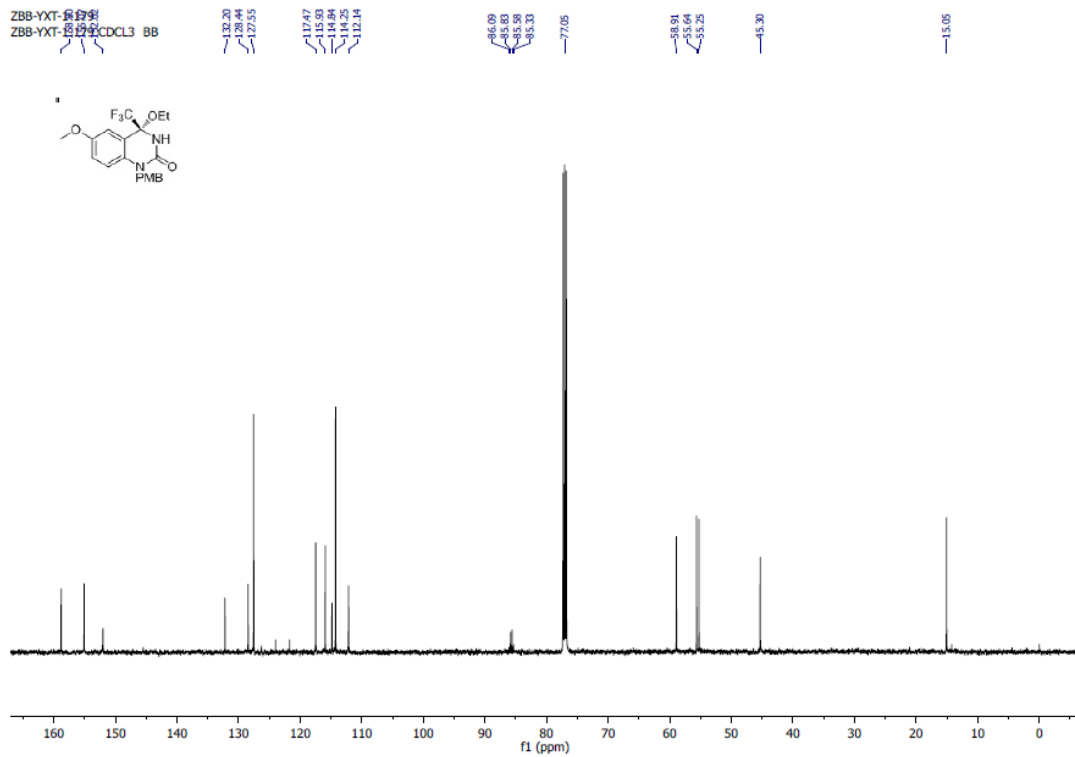

# Compound 3f

ZB89424-1-180  
ZB89424-1-180

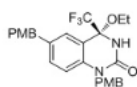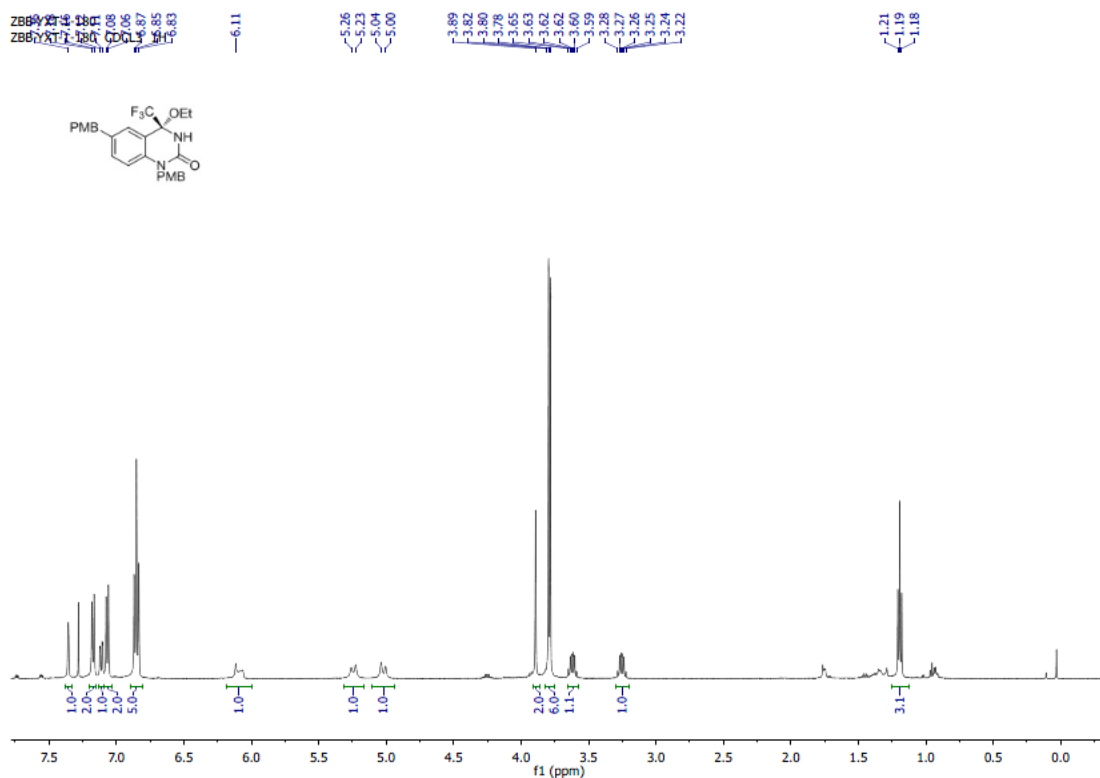

ZB89424-1-180  
ZB89424-1-180

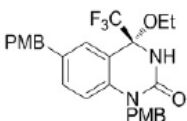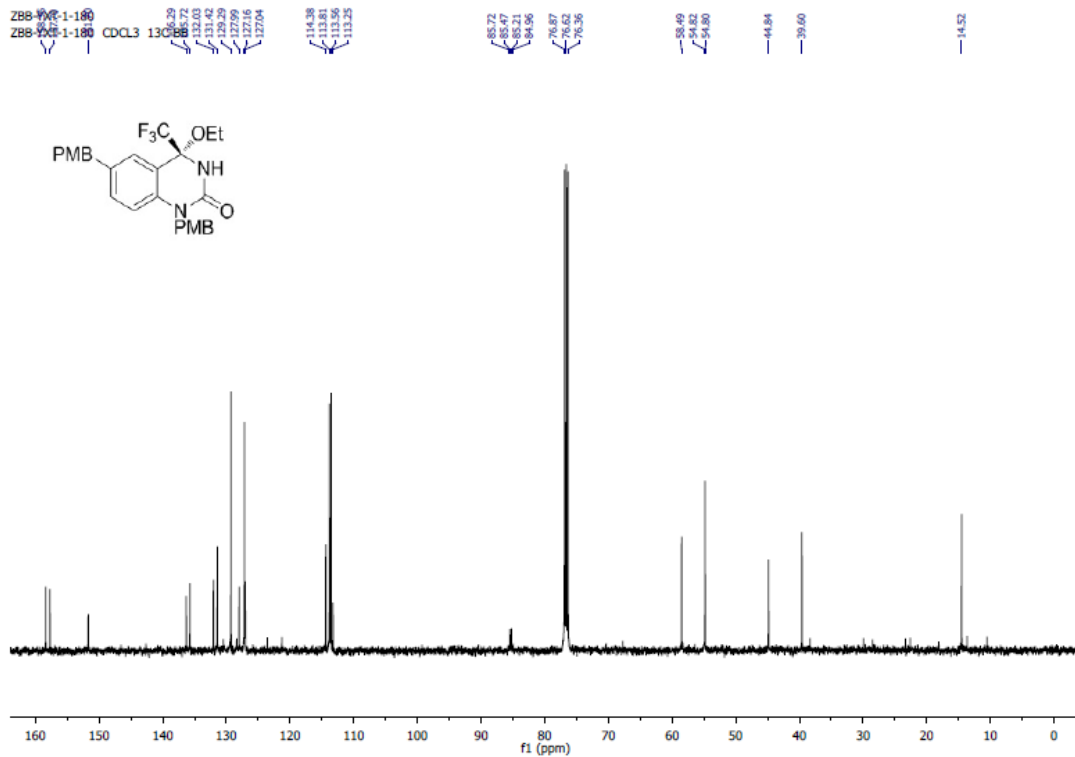

# Compound 3g

ZBB-YXT-188  
 ZBB-YXT-188 CDCl<sub>3</sub>

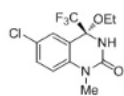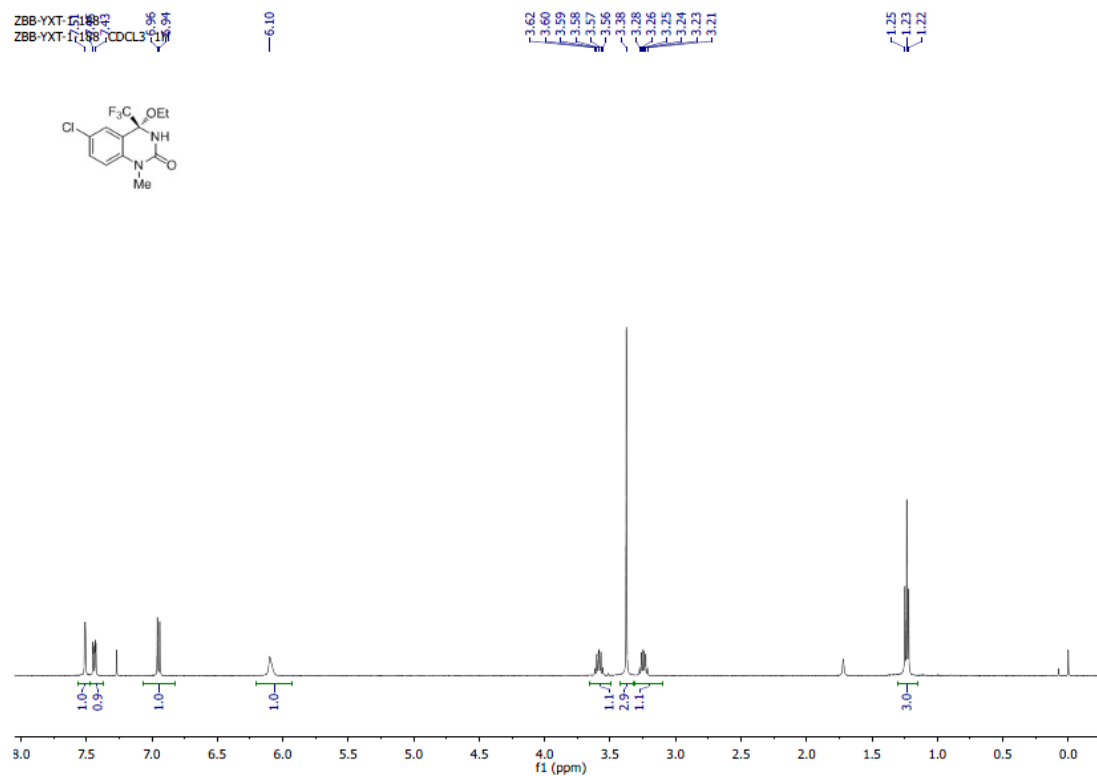

ZBB-YXT-188  
 ZBB-YXT-188 CDCl<sub>3</sub>

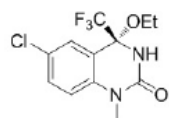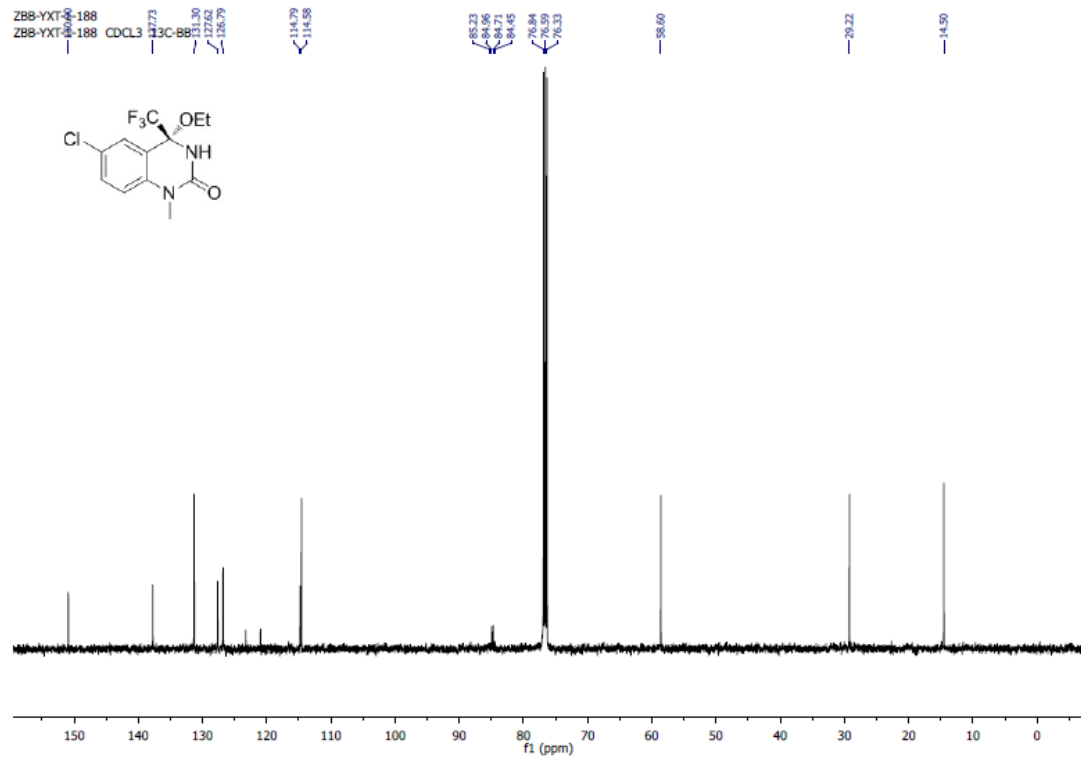

# Compound 3h

ZBB-YX-1-168  
 ZBB-YX-1-168 CDCl<sub>3</sub> 1H

7.46  
 7.46  
 7.33  
 6.88  
 6.88  
 6.44

3.63  
 3.63  
 3.60  
 3.60  
 3.58  
 3.58  
 3.57  
 3.30  
 3.29  
 3.27  
 3.27  
 3.25  
 3.24

1.25  
 1.23  
 1.23

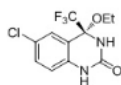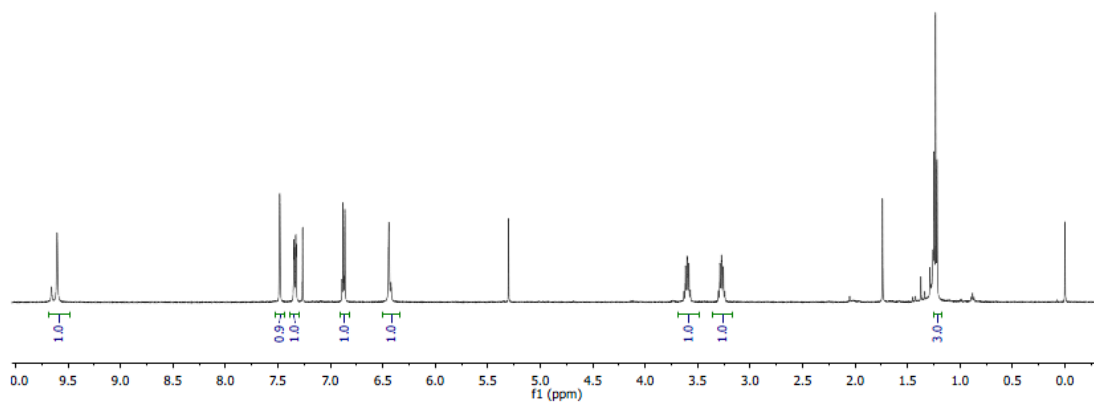

ZBB-YX-1-168  
 ZBB-YX-1-168 CDCl<sub>3</sub> 13C NMR

133.35  
 131.44  
 129.90  
 129.88  
 125.48  
 123.20  
 120.92  
 118.64  
 112.93

66.37  
 66.17  
 65.85  
 65.59  
 76.83  
 76.35  
 76.32

58.88

14.48

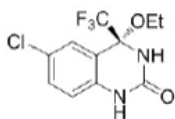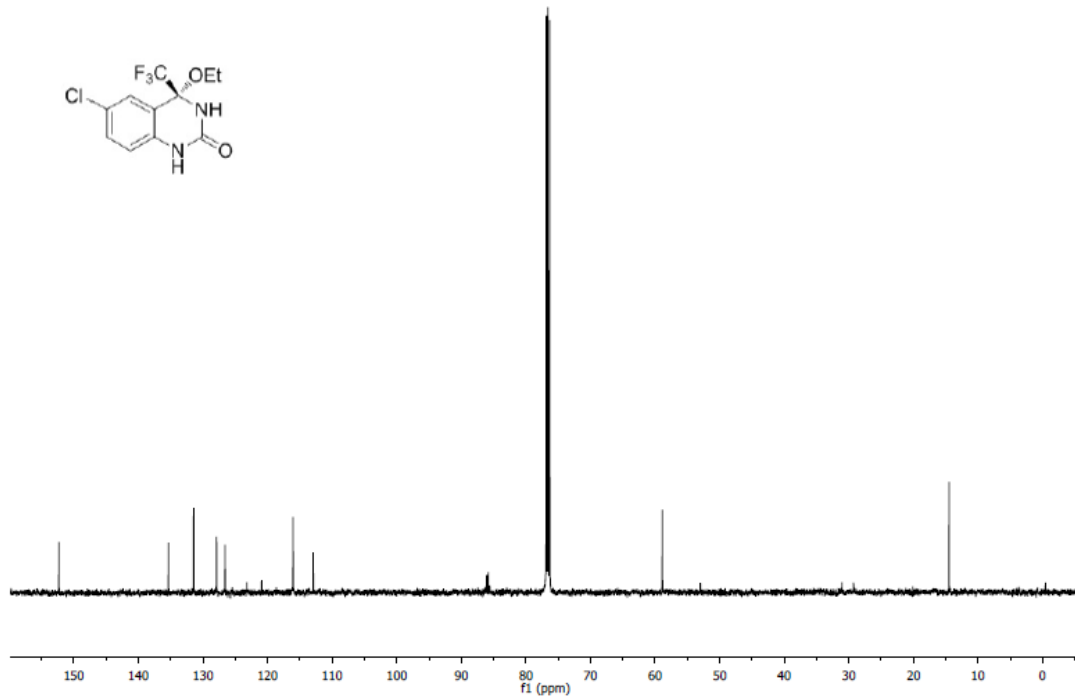

# Compound 3i

ZBB-YXT-182  
ZBB-YXT-182 DMSO 1H

8.73

7.76

7.75

7.54

7.12

7.11

3.56

3.55

3.53

3.51

3.50

3.15

3.13

3.12

3.10

3.09

1.13

1.12

1.10

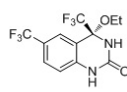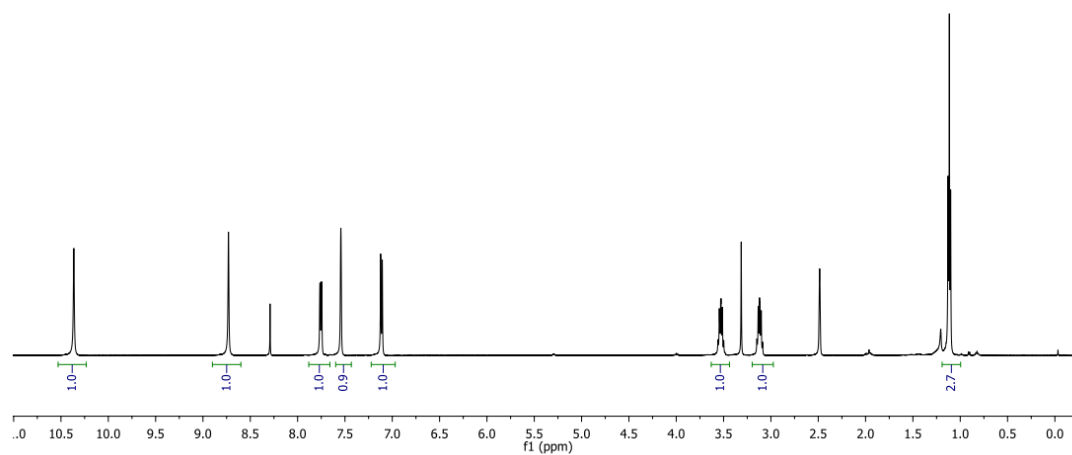

ZBB-YXT-182  
ZBB-YXT-182 DMSO 13C-BB

129.18

128.06

122.63

122.37

122.11

115.91

112.27

86.59

86.06

85.84

50.03

15.23

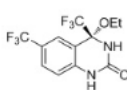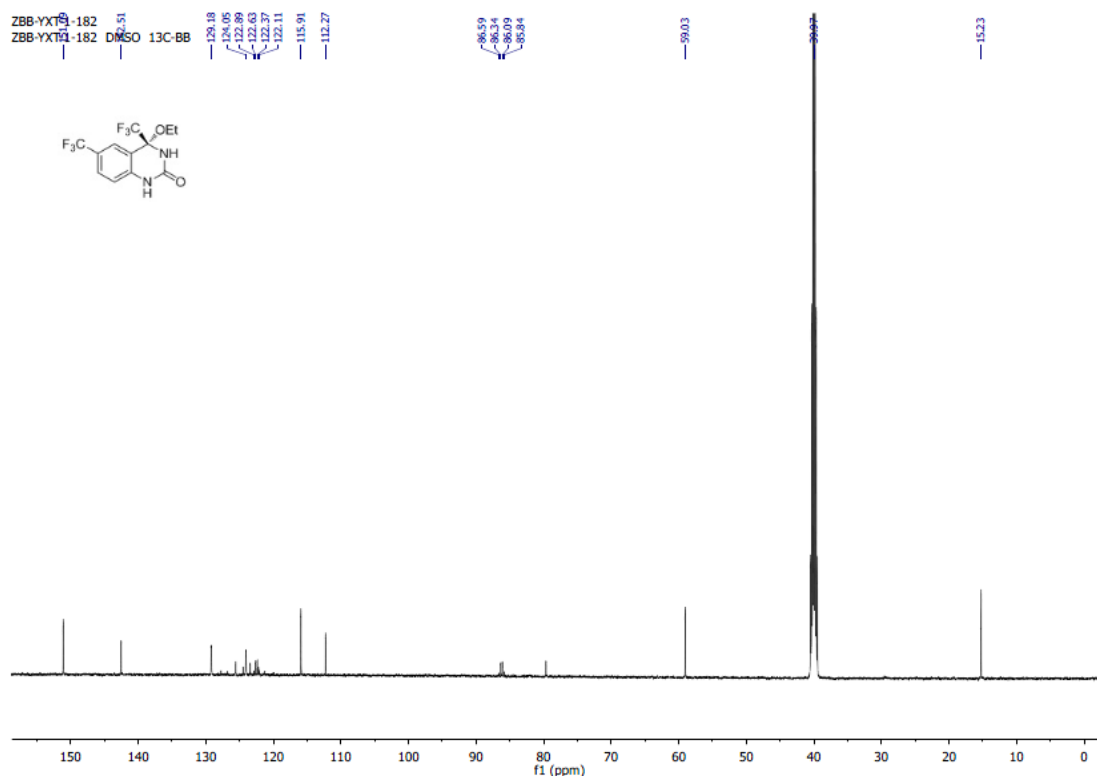



# Compound 3j

ZBB-YXT1-164  
 ZBB-YXT1-164

CDCl<sub>3</sub> BB  
 6.70  
 6.89  
 6.90  
 6.91  
 6.92  
 5.32  
 5.29  
 5.07  
 5.04  
 4.69  
 4.67  
 4.35  
 4.33  
 3.80

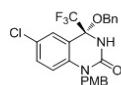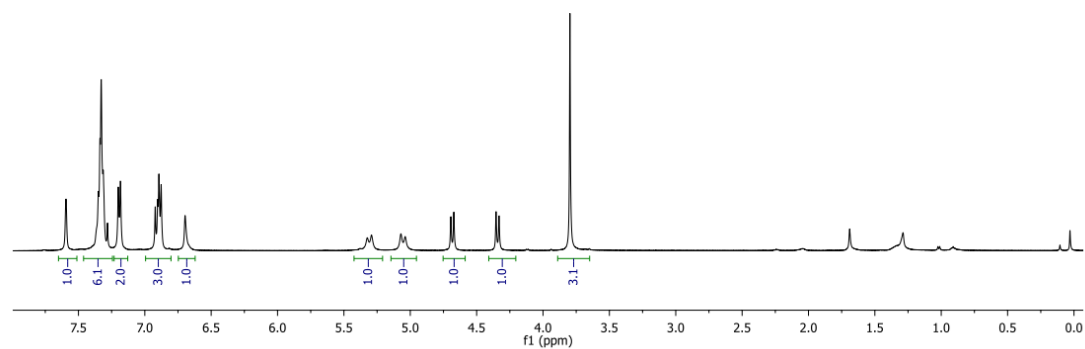

ZBB-YXT1-164  
 ZBB-YXT1-164

CDCl<sub>3</sub> BB  
 132.31  
 130.18  
 129.95  
 128.95  
 128.30  
 128.13  
 127.73  
 127.64  
 127.59  
 127.44  
 116.30  
 115.21  
 114.41  
 86.01  
 85.74  
 85.49  
 85.23  
 77.30  
 77.05  
 76.79  
 65.35  
 55.29  
 45.50

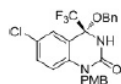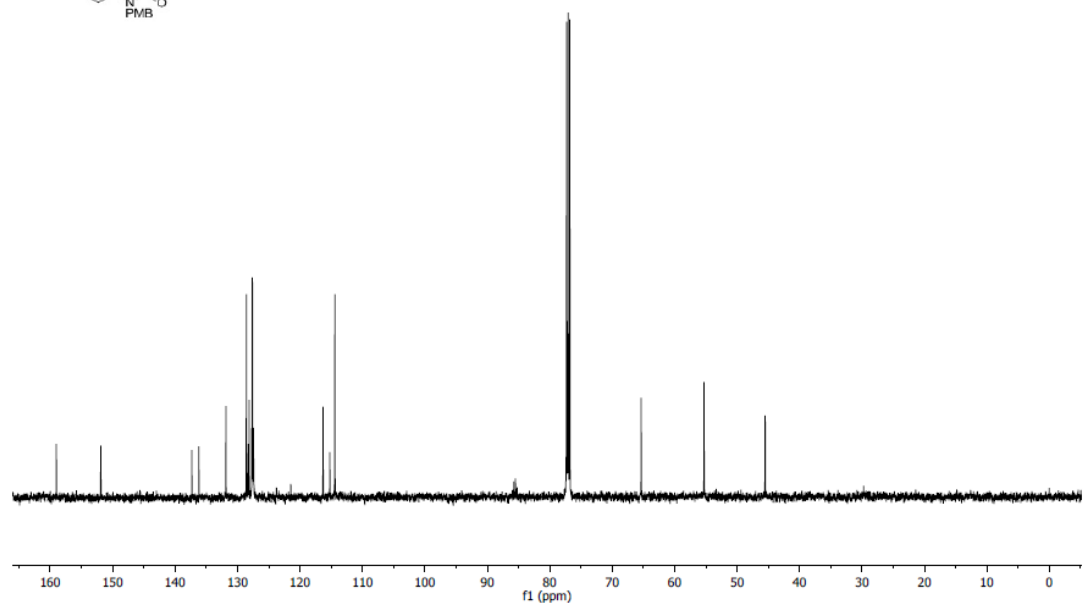

# Compound 3k

ZBB-YXT-1-17  
 ZBB-YXT-1-17  
 CDCl<sub>3</sub>  
 13C-BB

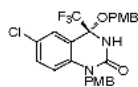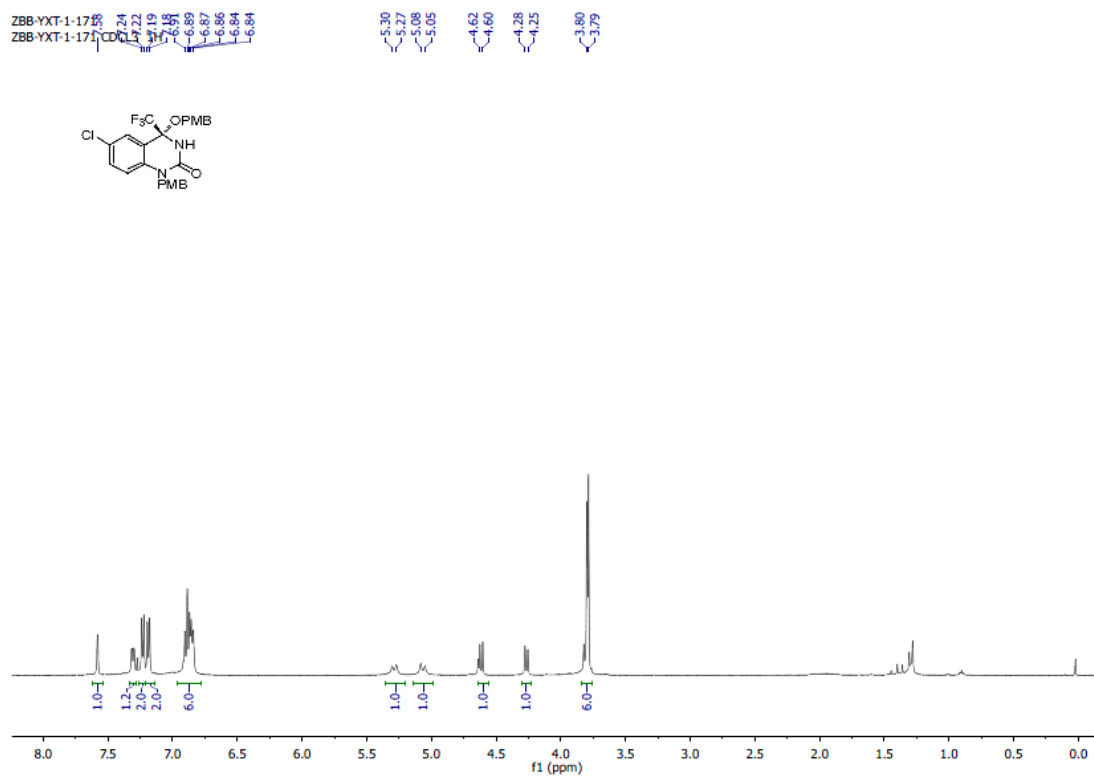

ZBB-YXT-1-17  
 ZBB-YXT-1-17  
 CDCl<sub>3</sub>  
 13C-BB

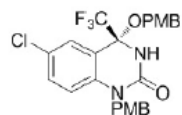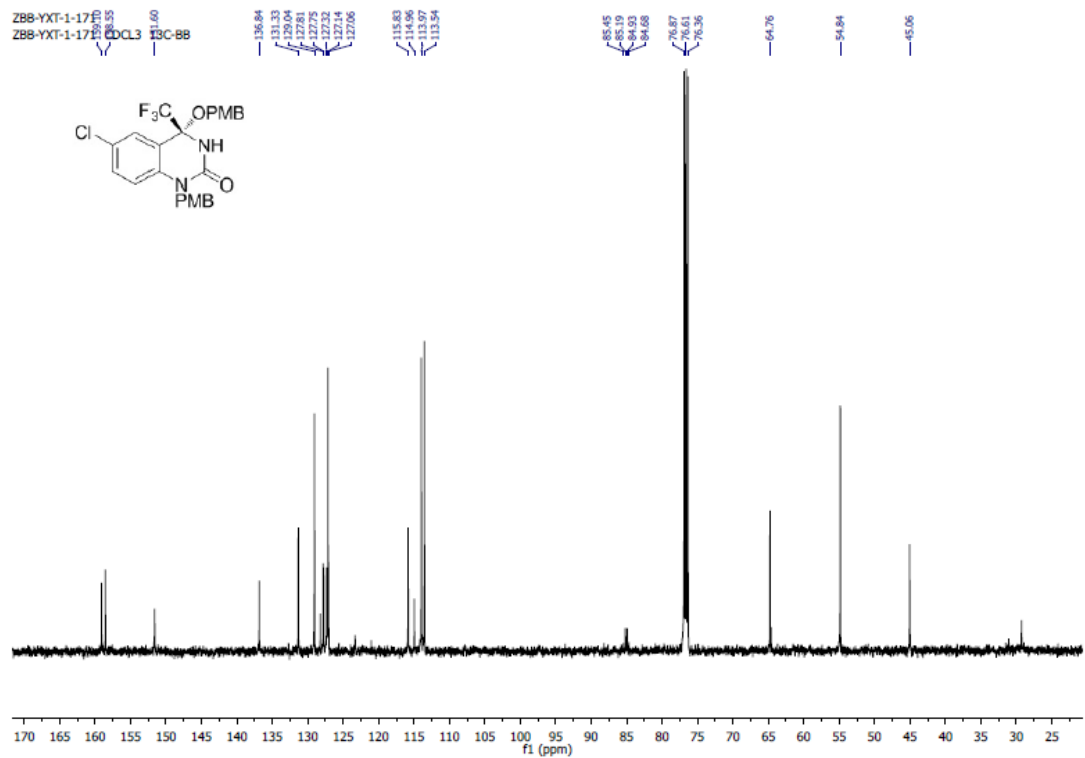

# Compound 31

ZBB-YX781-175  
ZBB-YX781-175 CDCl<sub>3</sub>

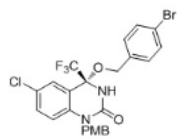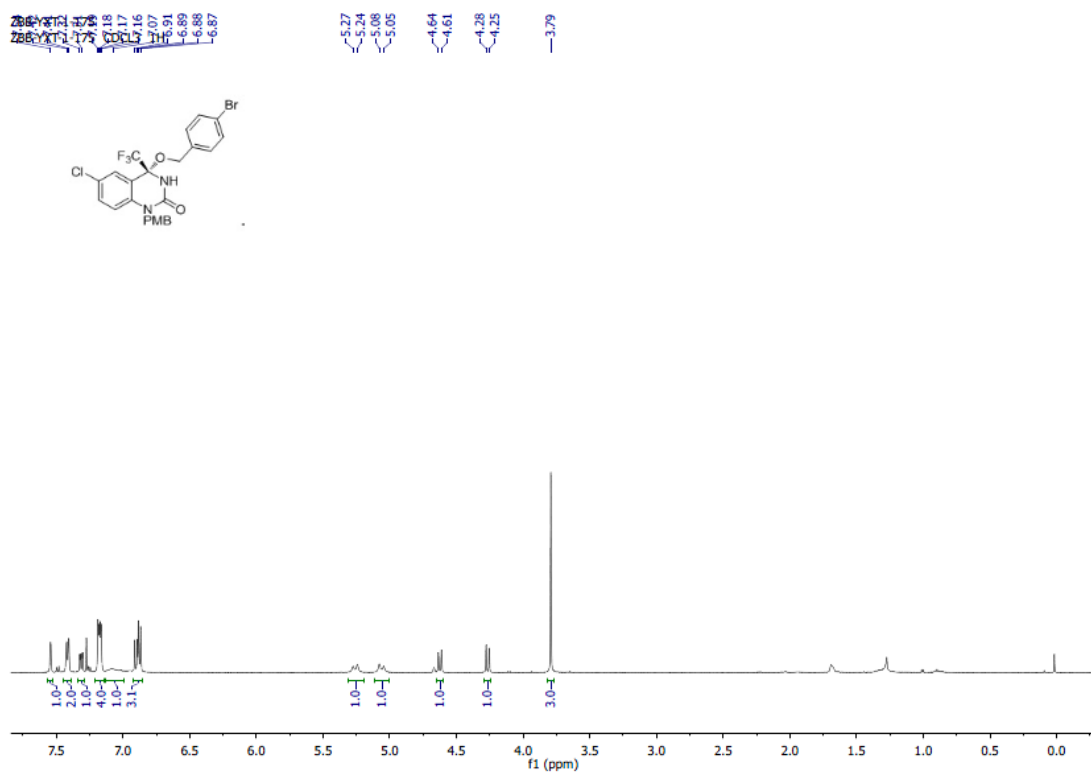

ZBB-YX781-175

ZBB-YX781-175 CDCl<sub>3</sub>

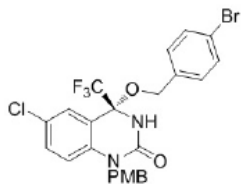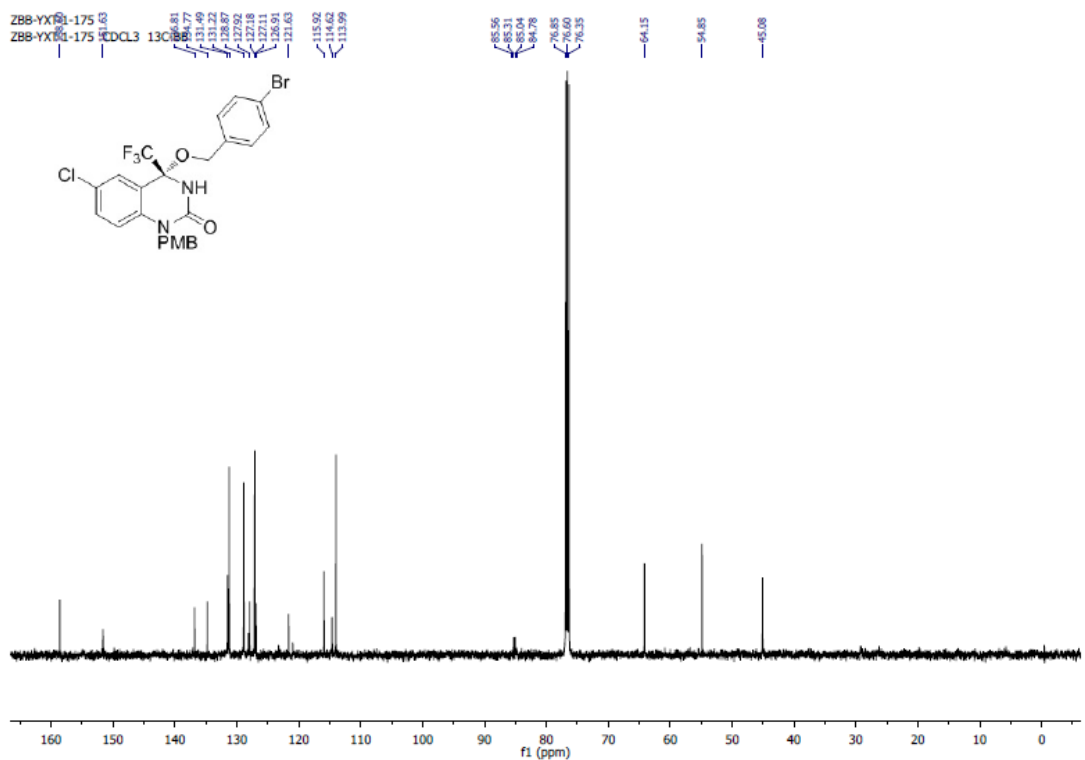

# Compound 3m

ZBB-YXT-1-169  
 ZBB-YXT-1-169 CDCl<sub>3</sub>

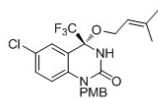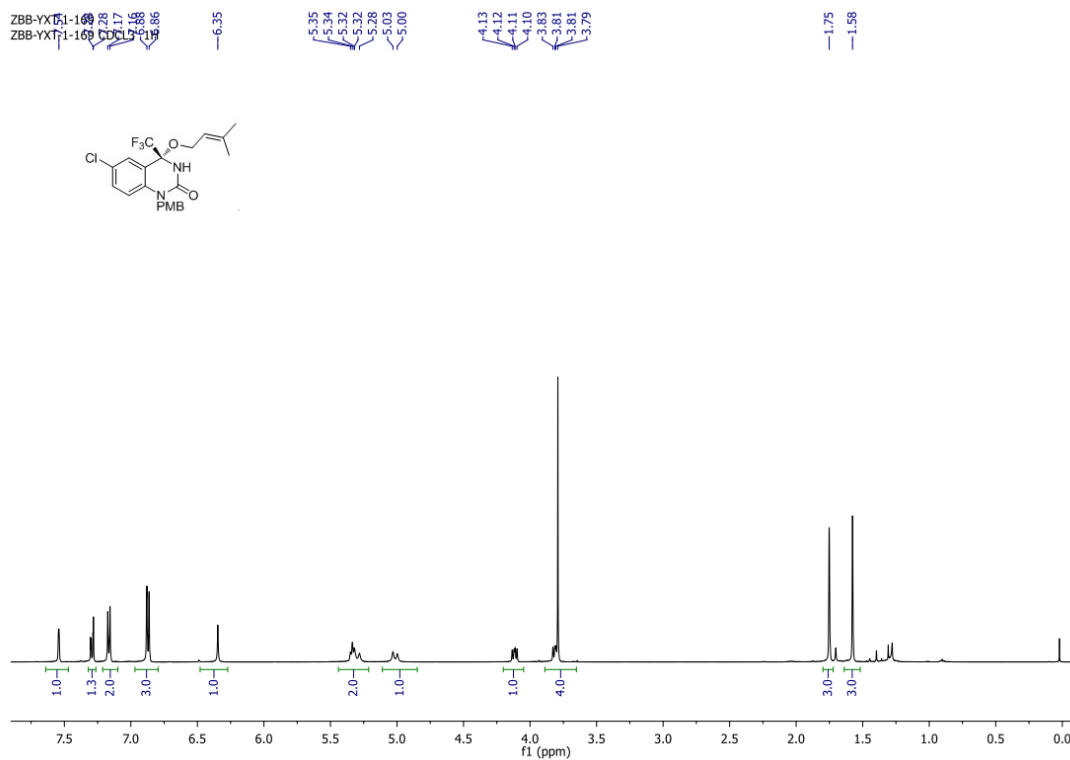

ZBB-YXT-1-169  
 ZBB-YXT-1-169 CDCl<sub>3</sub>

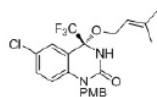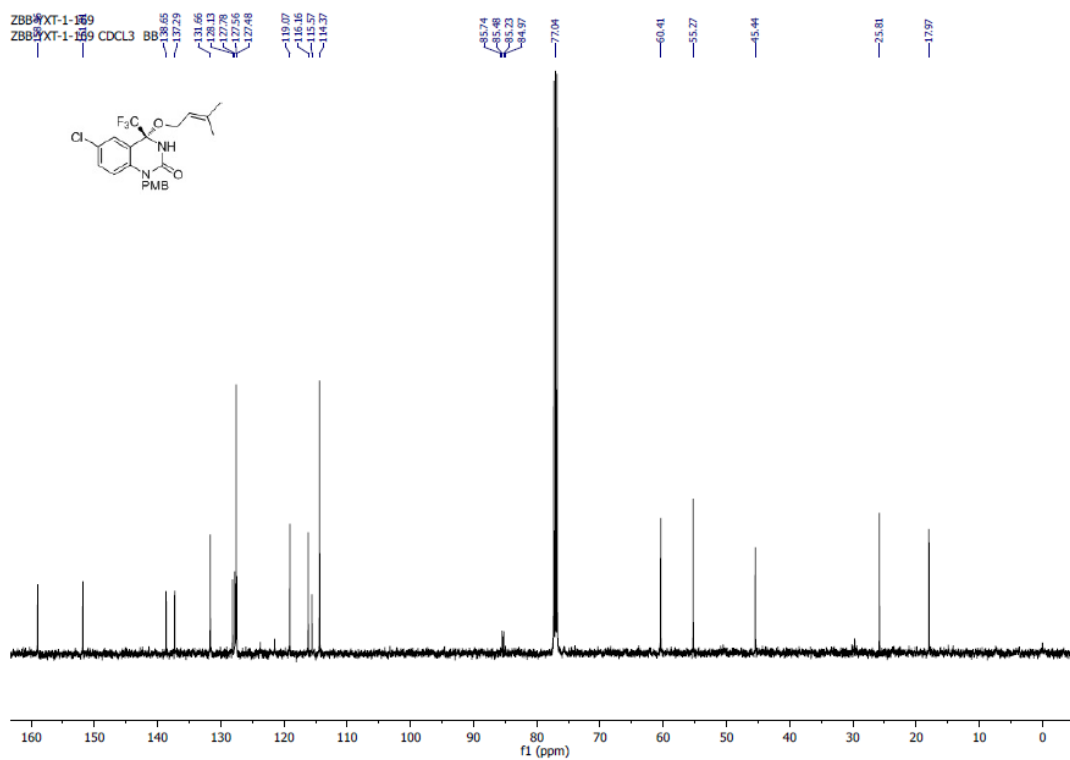

# Compound 3n

ZBB-YXT-176  
ZBB-YXT-176

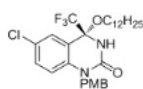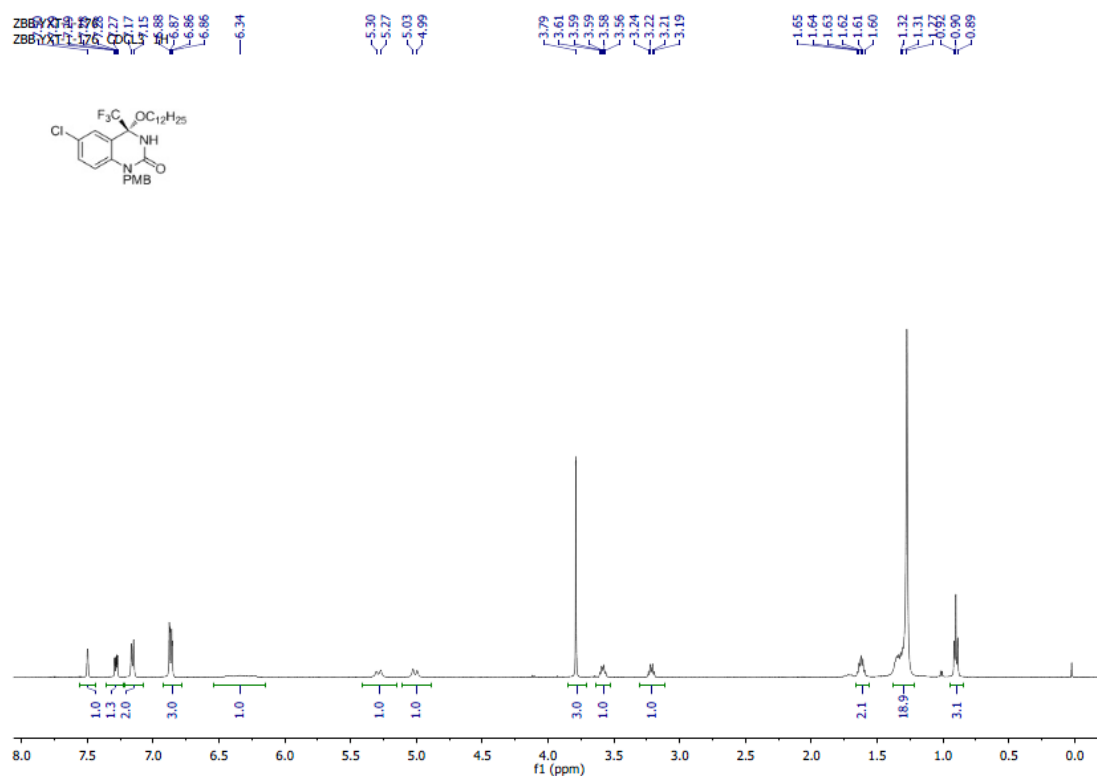

ZBB-YXT-176  
ZBB-YXT-176

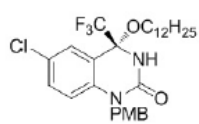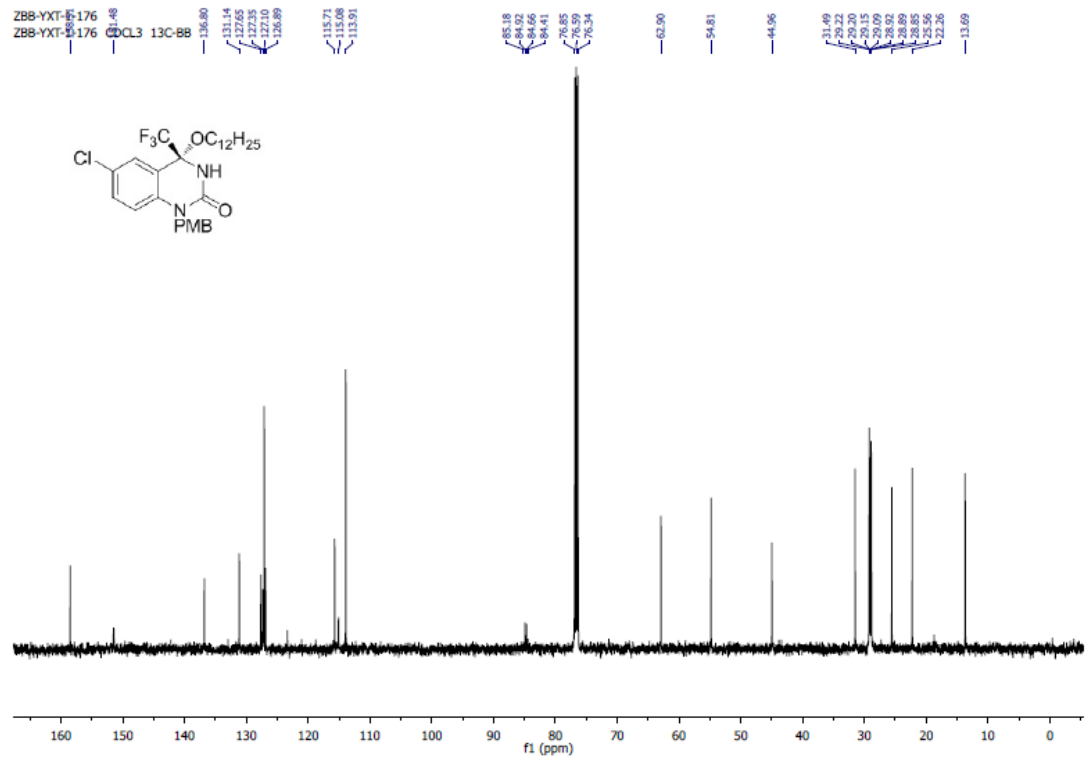

# Compound 3o

ZBB-ZD  
ZBB-ZD

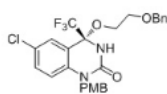

5.30  
5.26  
5.01  
4.97  
4.60

2.79  
2.67  
2.53  
2.42  
2.32  
2.50

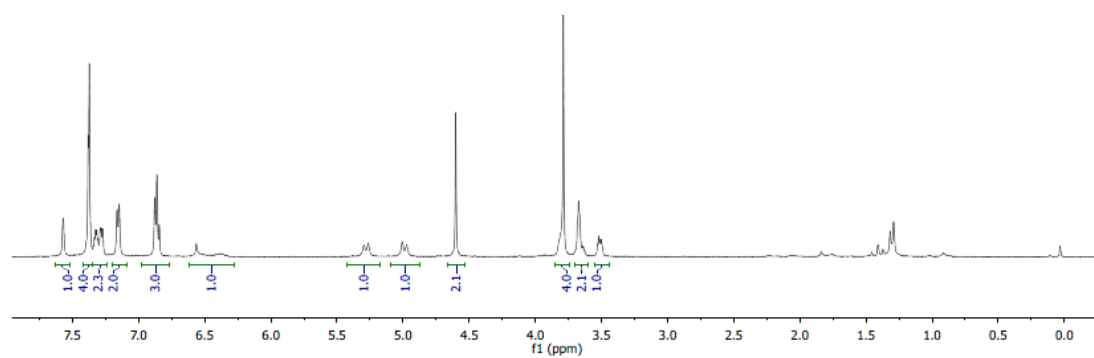

ZBB-ZD  
ZBB-ZD

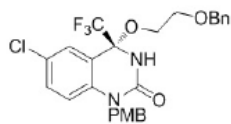

85.32  
85.07  
84.81  
84.55  
76.87  
76.62  
76.36  
76.25  
67.84  
62.54  
51.82  
41.96

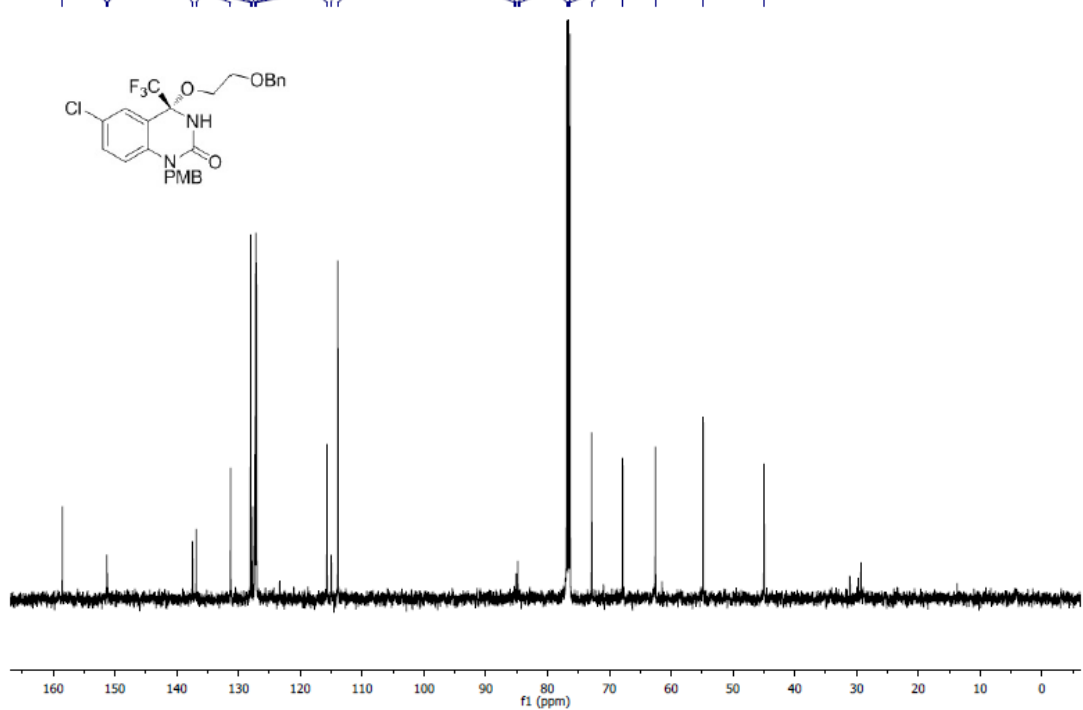

# Compound 3p

ZBB-YXT-1-194  
 ZBB-YXT-1-194 CDCl<sub>3</sub>

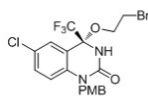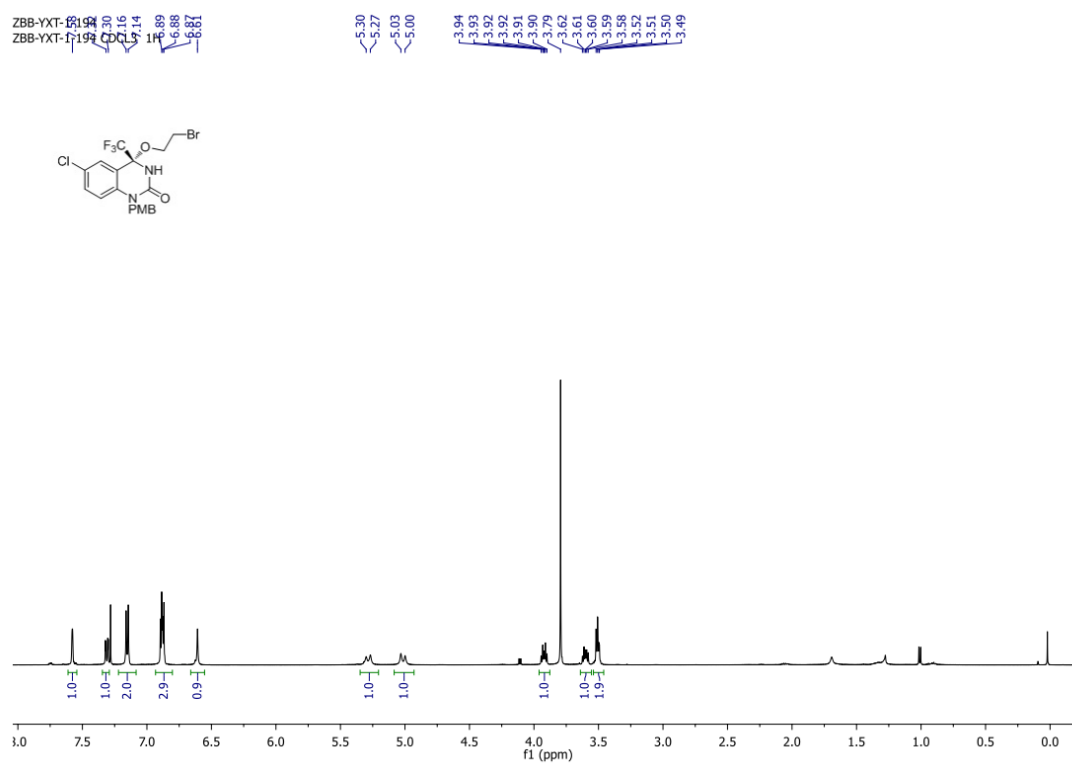

ZBB-YXT-1-194  
 ZBB-YXT-1-194 CDCl<sub>3</sub> BB

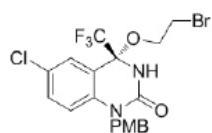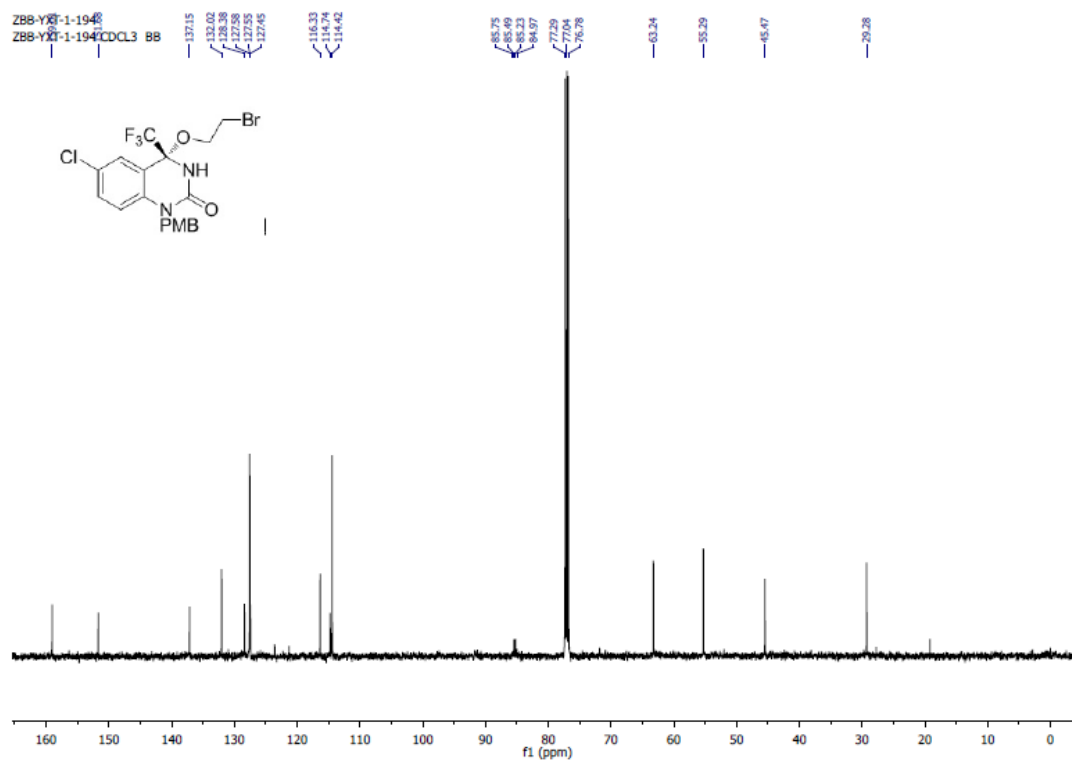

# Compound 3q

ZBB-YXT-1-195  
 ZBB-YXT-1-195

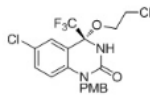

5.28  
 5.25  
 5.01  
 4.98  
 3.87  
 3.86  
 3.85  
 3.84  
 3.83  
 3.77  
 3.66  
 3.65  
 3.55  
 3.54  
 3.53  
 3.52  
 3.51

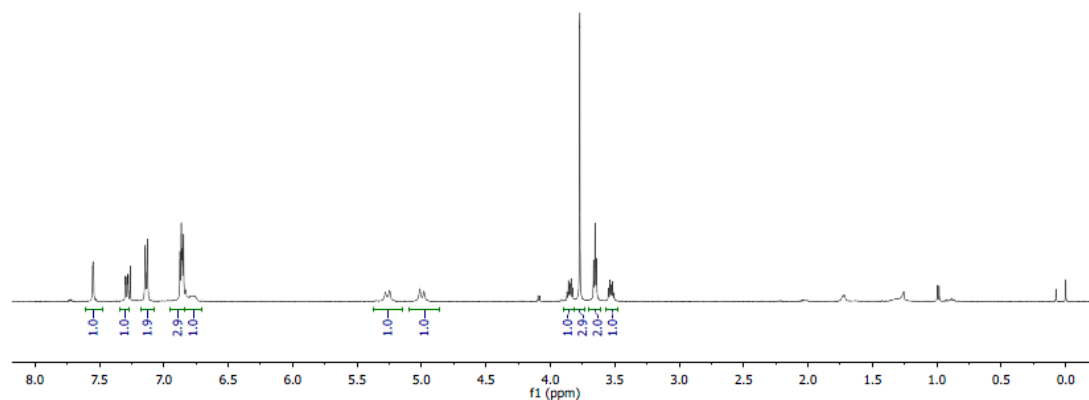

ZBB-YXT-1-195  
 ZBB-YXT-1-195

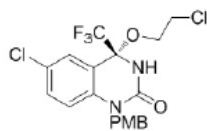

133.37  
 133.88  
 136.73  
 131.54  
 127.93  
 127.12  
 127.01  
 118.87  
 114.36  
 113.97  
 78.34  
 78.07  
 78.55  
 76.86  
 76.66  
 76.35  
 63.00  
 54.84  
 45.02  
 41.98

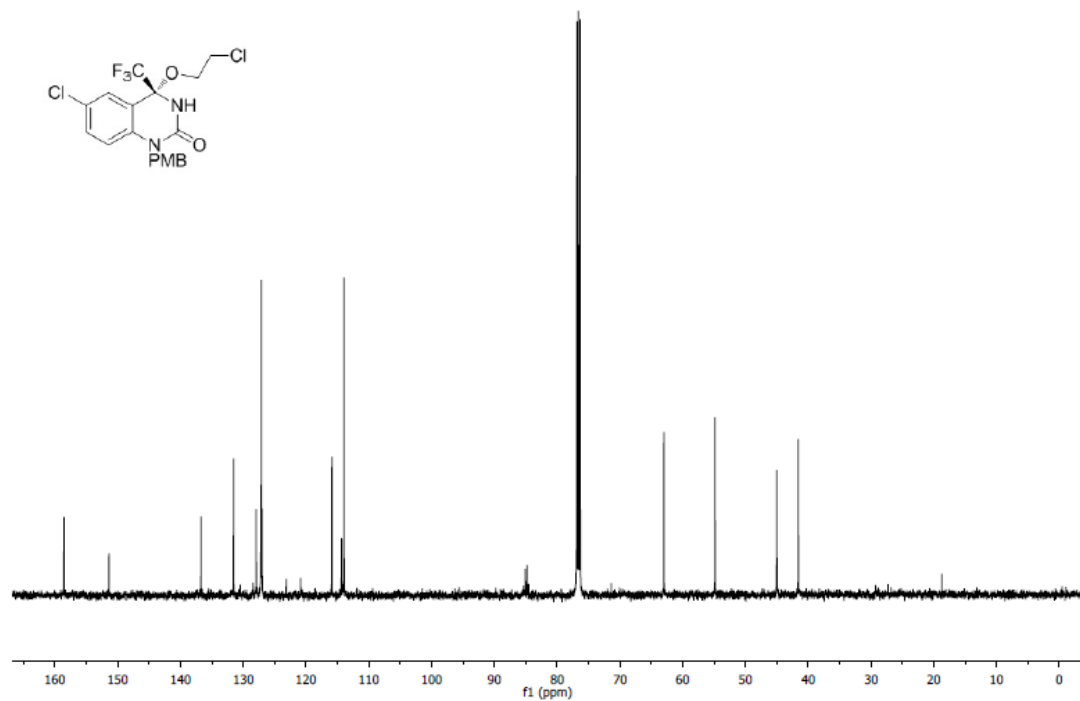



# Compound 3r

ZBB-ZD-2-1118  
ZBB-ZD-2-1111 CDCl<sub>3</sub>

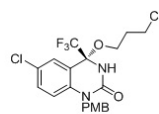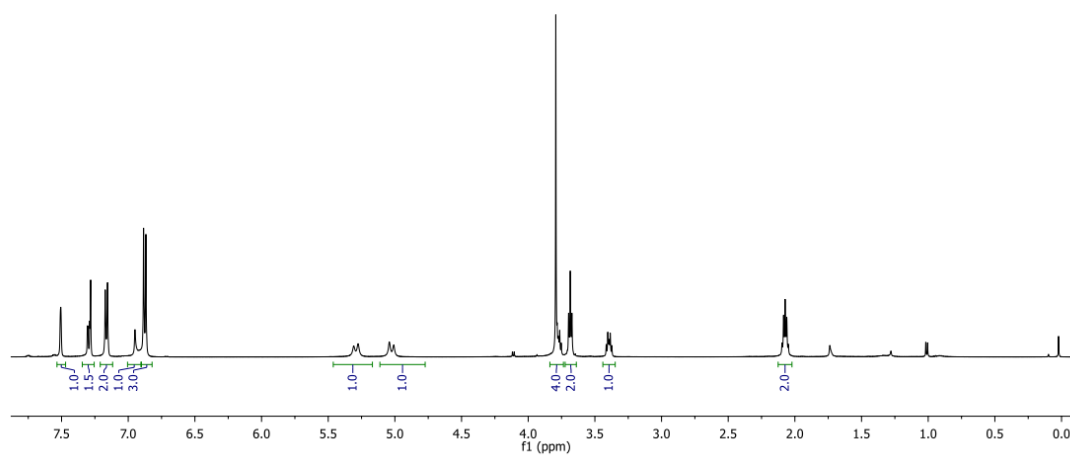

ZBB-ZD-2-1118  
ZBB-ZD-2-1111 CDCl<sub>3</sub> 88

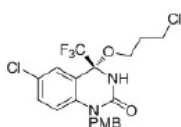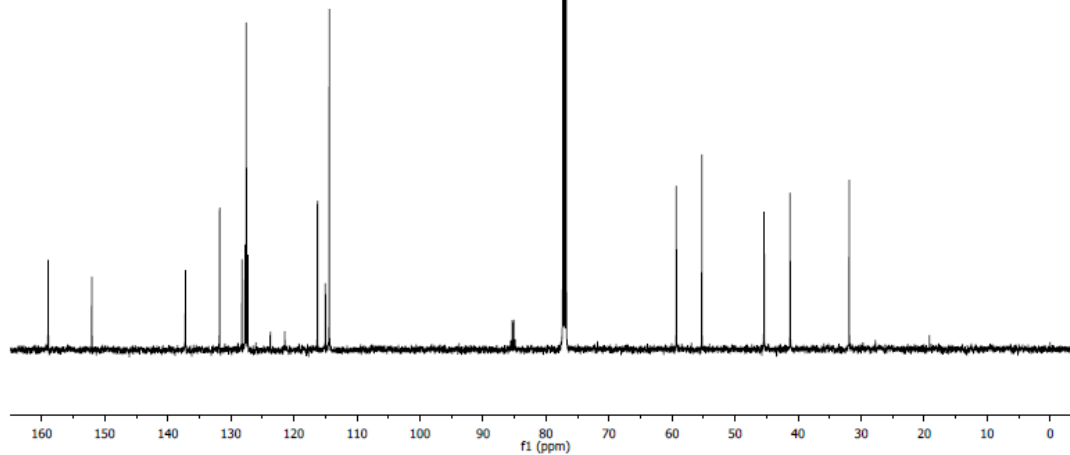

# Compound 3s

ZBB-YX-1-167  
 ZBB-YX-1-167 CDCl<sub>3</sub>

7.56, 7.54, 7.52, 7.51, 7.13, 6.87, 6.86, 6.85, 6.84, 6.42, 5.28, 5.25, 5.02, 4.99, 3.77, 3.26

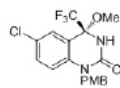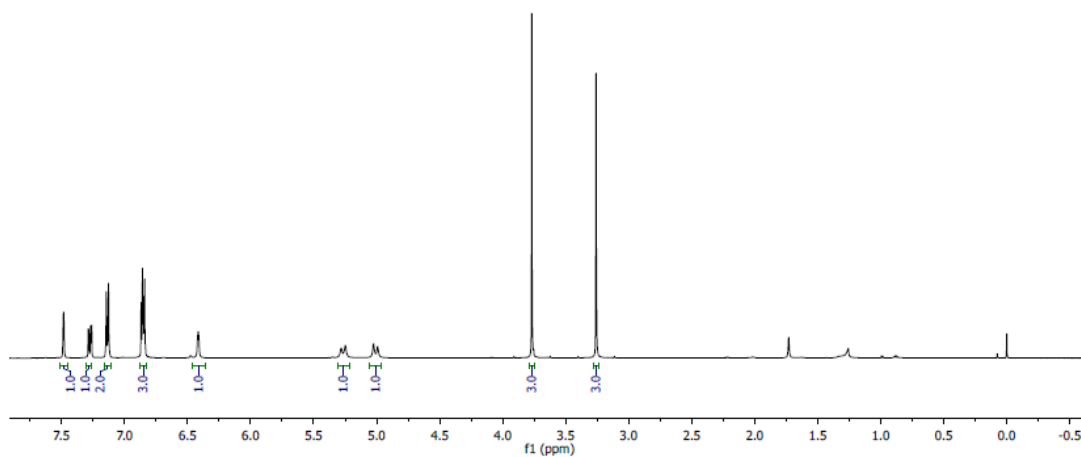

ZBB-YX-1-167  
 ZBB-YX-1-167 CDCl<sub>3</sub>

13C-NMR peaks: 177.00, 131.34, 127.79, 127.27, 127.09, 126.88, 115.82, 114.23, 113.93, 85.63, 85.38, 83.12, 81.66, 76.85, 76.60, 75.54, 54.82, 49.95, 44.98

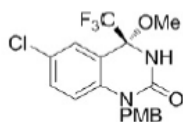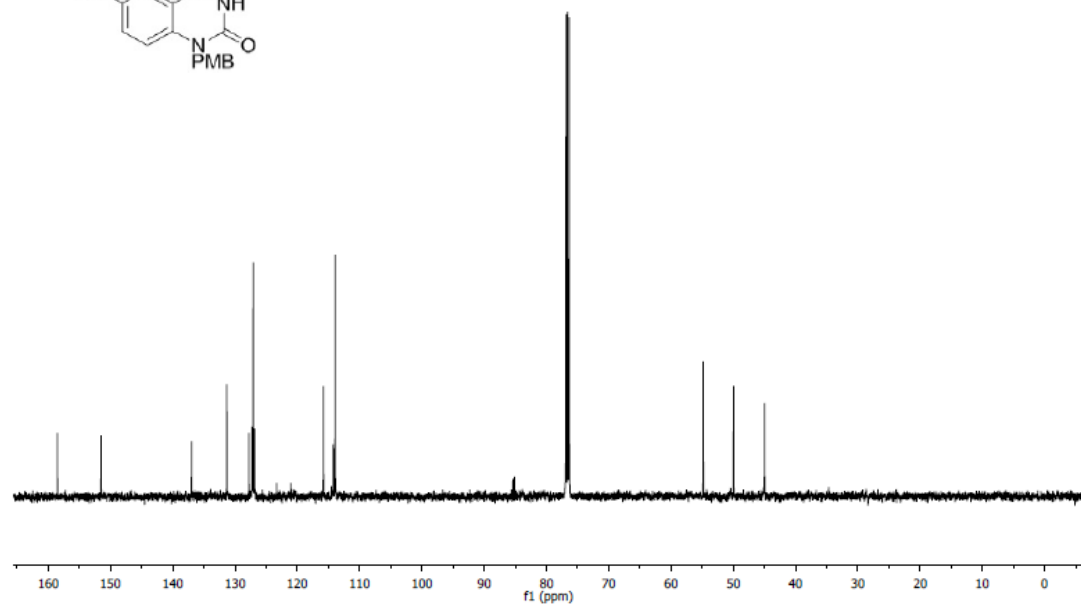

# Compound 3t

ZBB-YXT-1-163  
ZBB-YXT-1-163 CDCl<sub>3</sub>

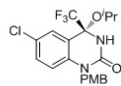

5.29  
5.26  
5.02  
4.99

3.92  
3.90  
3.89  
3.88  
3.87  
3.77

1.29  
1.27  
1.10  
1.09

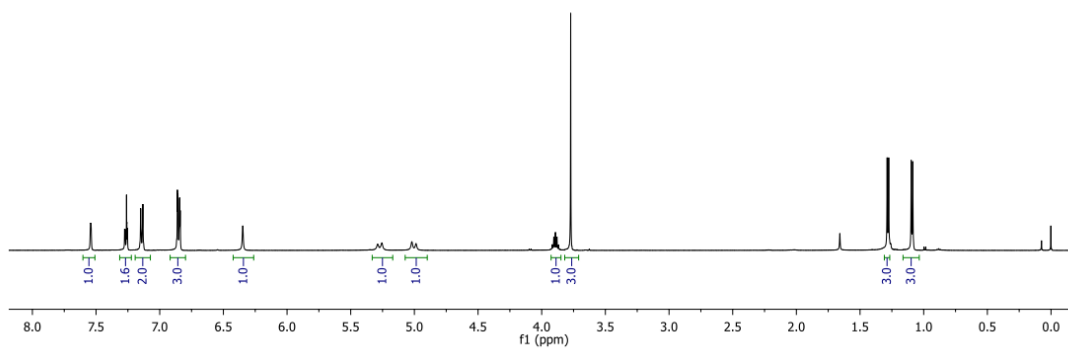

ZBB-YXT-1-163  
ZBB-YXT-1-163 CDCl<sub>3</sub> 13C-BB

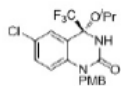

131.60  
127.92  
127.93  
127.96  
127.96

116.43  
116.08  
114.37

86.03  
85.77  
85.52  
85.26

77.04

67.83

52.28

45.42

24.40  
23.69

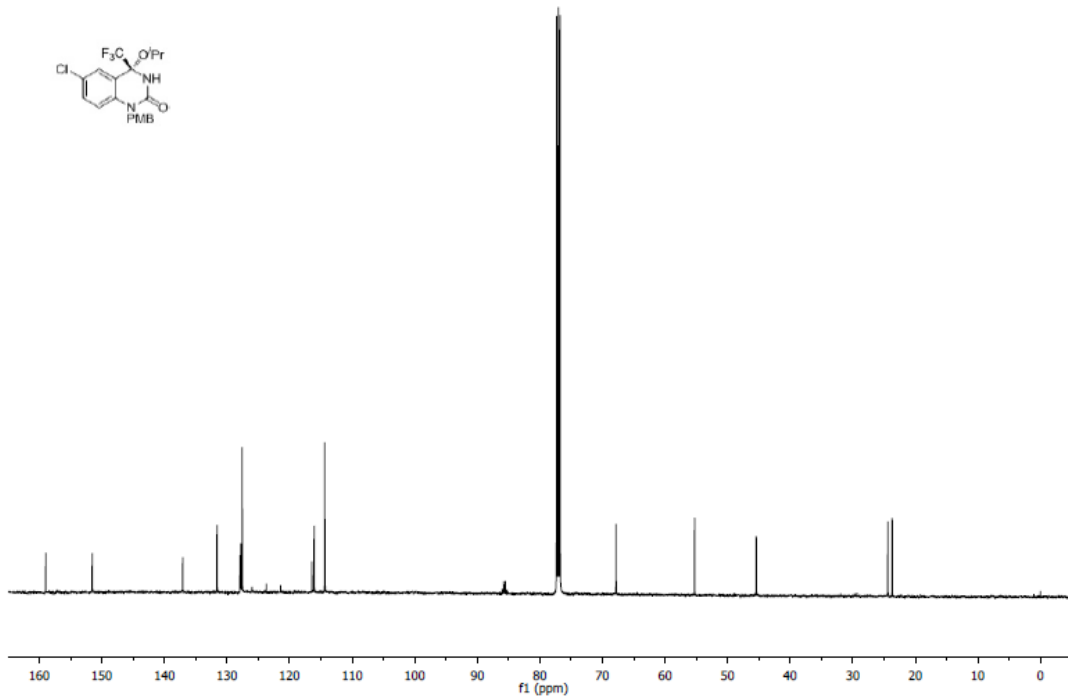

# Compound 4a

ZBB-ZD-3-121  
 ZBB-ZD-3-121 CDCl<sub>3</sub>

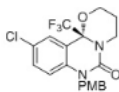

5.21  
 5.18  
 5.05  
 5.02  
 4.56  
 4.56  
 4.51  
 4.52  
 4.22  
 4.21  
 4.21  
 4.21  
 3.79  
 3.79  
 3.56  
 3.55  
 3.53  
 3.53  
 3.53  
 3.51  
 3.50  
 2.11  
 2.09  
 2.08  
 2.06  
 2.05  
 2.05  
 2.04  
 2.02  
 2.01  
 1.99  
 1.98  
 1.96  
 1.97  
 1.96  
 1.96  
 1.95  
 1.95  
 1.94

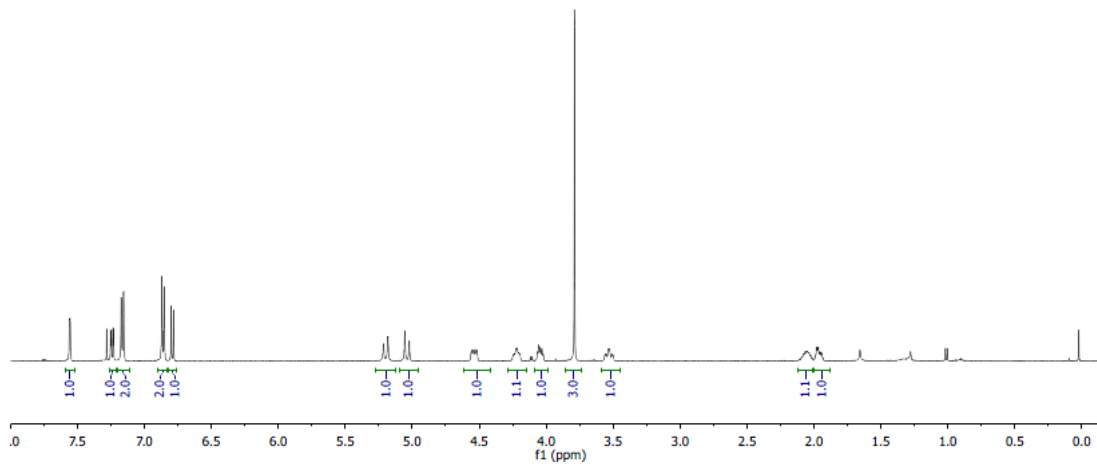

ZBB-ZD-3-121  
 ZBB-ZD-3-121 CDCl<sub>3</sub> BB

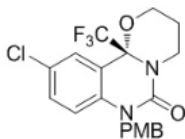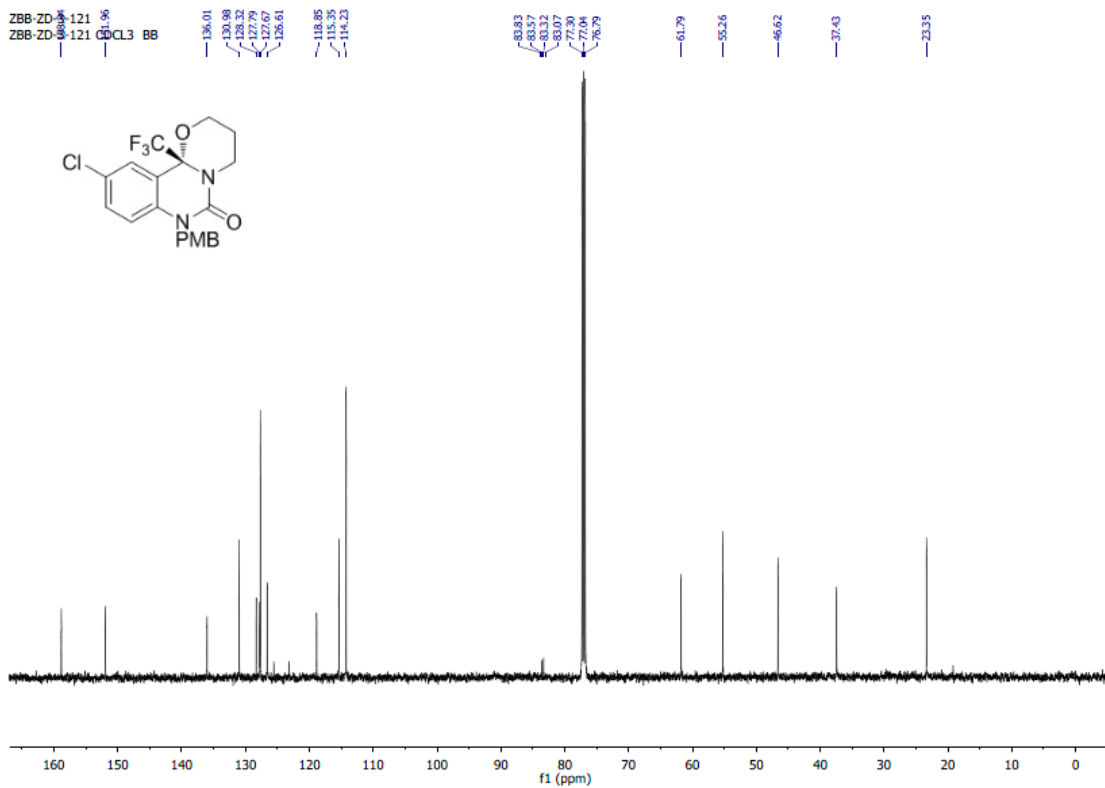

# Compound 4b

7.529, 7.527, 7.525, 7.523, 7.521, 7.519, 7.517, 7.515, 7.513, 7.511, 7.509, 7.507, 7.505, 7.503, 7.501, 7.499, 7.497, 7.495, 7.493, 7.491, 7.489, 7.487, 7.485, 7.483, 7.481, 7.479, 7.477, 5.19, 5.15, 5.05, 5.01, 4.54, 4.53, 4.51, 4.49, 4.20, 4.05, 4.02, 4.01, 3.54, 3.51, 3.48, 3.47, 2.08, 2.07, 2.05, 2.04, 2.01, 2.00, 1.98, 1.96, 1.95, 1.93, 1.92

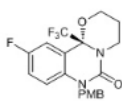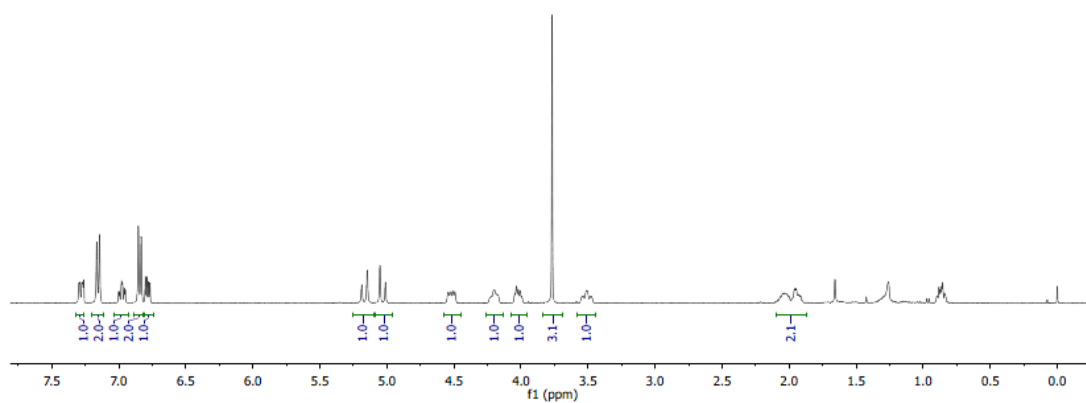

151.118, 151.117, 151.116, 151.115, 151.114, 151.113, 151.112, 151.111, 151.110, 151.109, 151.108, 151.107, 151.106, 151.105, 151.104, 151.103, 151.102, 151.101, 151.100, 151.099, 151.098, 151.097, 151.096, 151.095, 151.094, 151.093, 151.092, 151.091, 151.090, 151.089, 151.088, 151.087, 151.086, 151.085, 151.084, 151.083, 151.082, 151.081, 151.080, 151.079, 151.078, 151.077, 151.076, 151.075, 151.074, 151.073, 151.072, 151.071, 151.070, 151.069, 151.068, 151.067, 151.066, 151.065, 151.064, 151.063, 151.062, 151.061, 151.060, 151.059, 151.058, 151.057, 151.056, 151.055, 151.054, 151.053, 151.052, 151.051, 151.050, 151.049, 151.048, 83.88, 83.57, 83.27, 82.94, 61.81, 55.26, 6.75, 3.739, 2.338

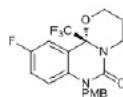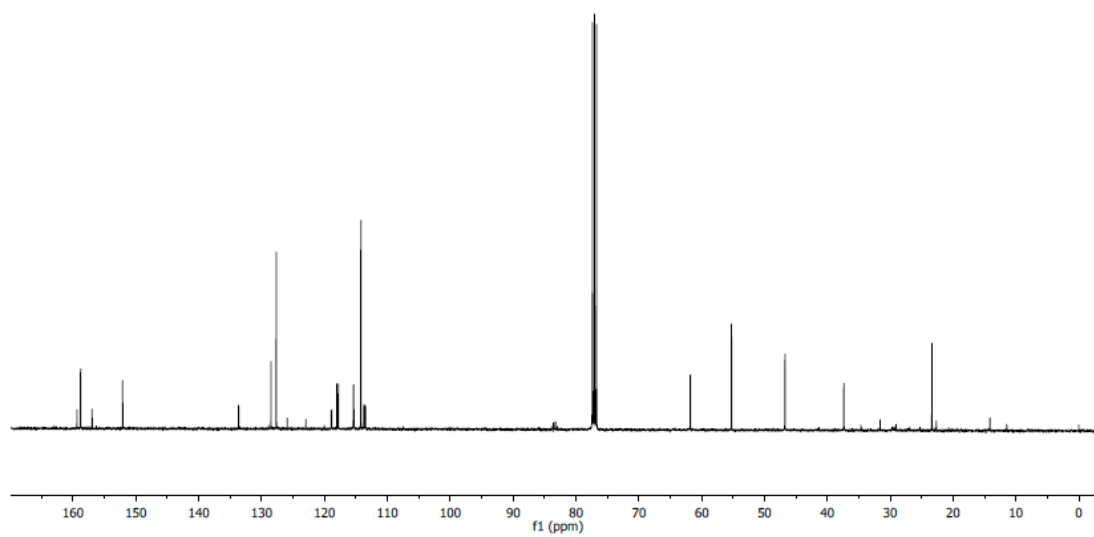

# Compound 4c

151118-XHXZD-403

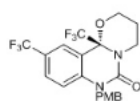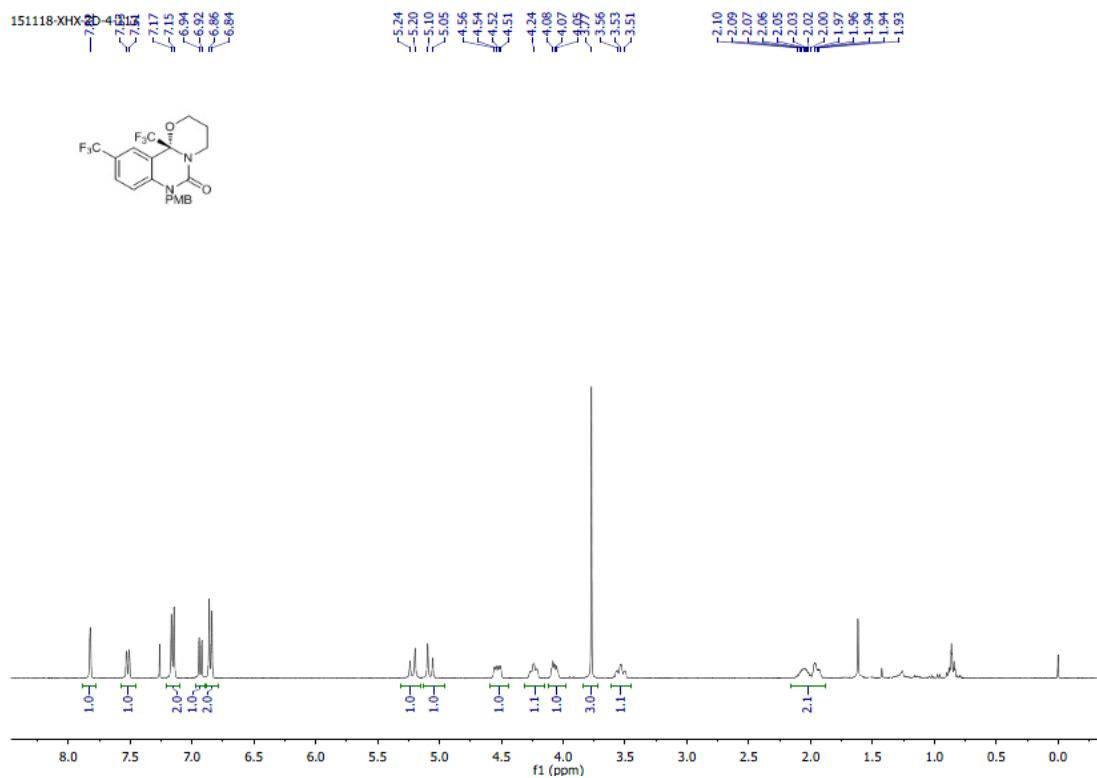

151118-XHXZD-403

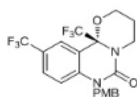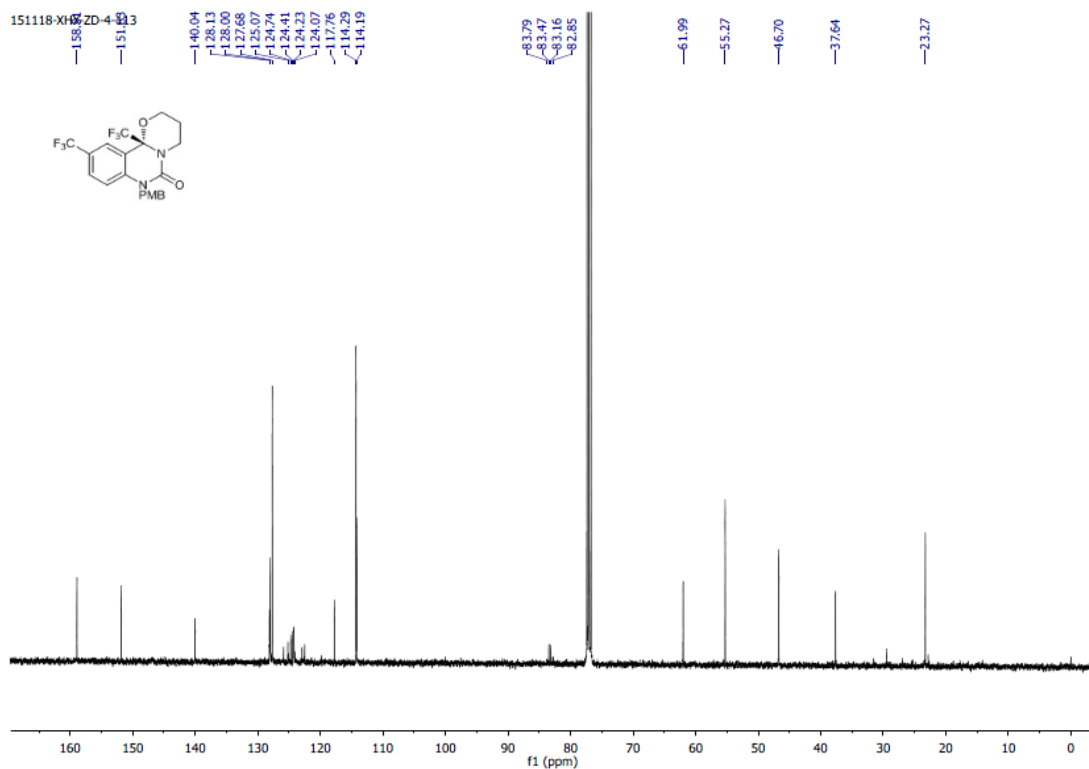

# Compound 4d

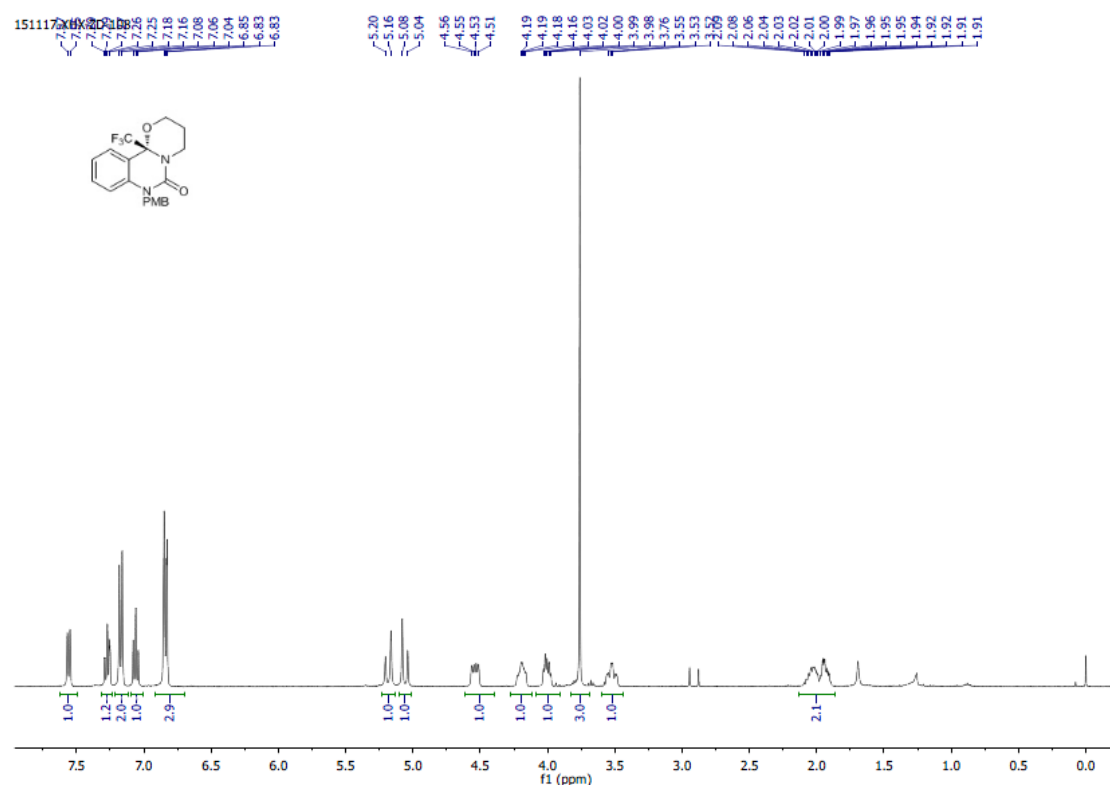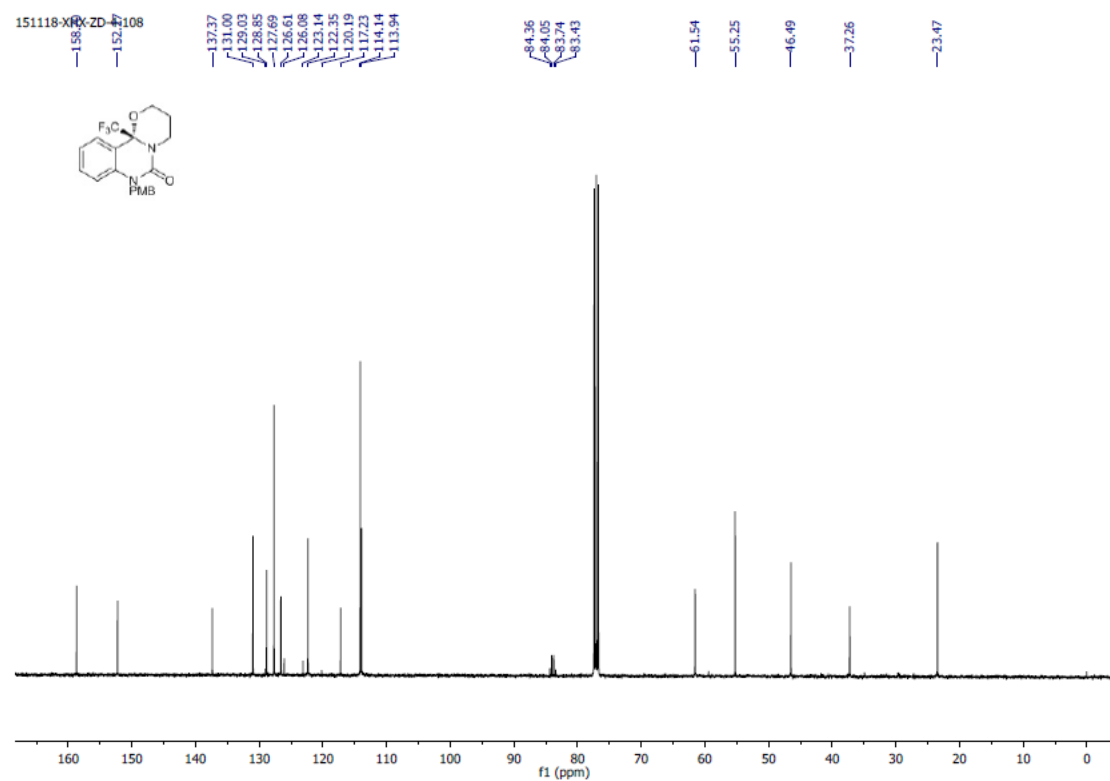

# Compound 4e

151118-XHX

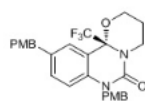

7.86  
7.85  
7.04  
7.01  
6.83  
6.81  
6.80  
6.73  
5.15  
5.11  
5.05  
5.01  
4.55  
4.53  
4.51  
4.50  
4.21  
4.18  
4.15  
4.01  
4.00  
3.98  
3.86  
3.77  
3.75  
3.53  
3.50  
3.48

2.04  
2.02  
1.99  
1.94  
1.93  
1.91  
1.89

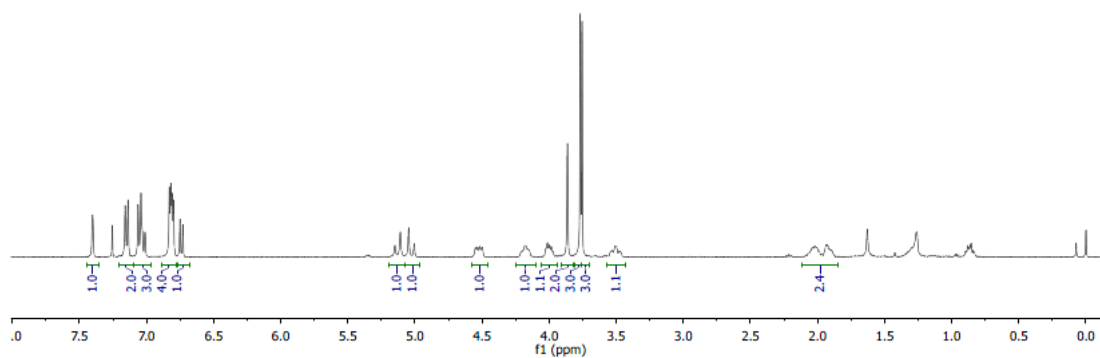

151118-ZD

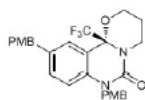

158.82  
158.82  
152.49  
135.75  
135.51  
132.70  
131.30  
129.80  
128.97  
127.71  
126.67  
117.11  
114.11  
114.08  
113.91

84.32  
84.01  
83.70  
83.39

61.59  
55.26  
46.53  
40.16  
37.30  
23.47

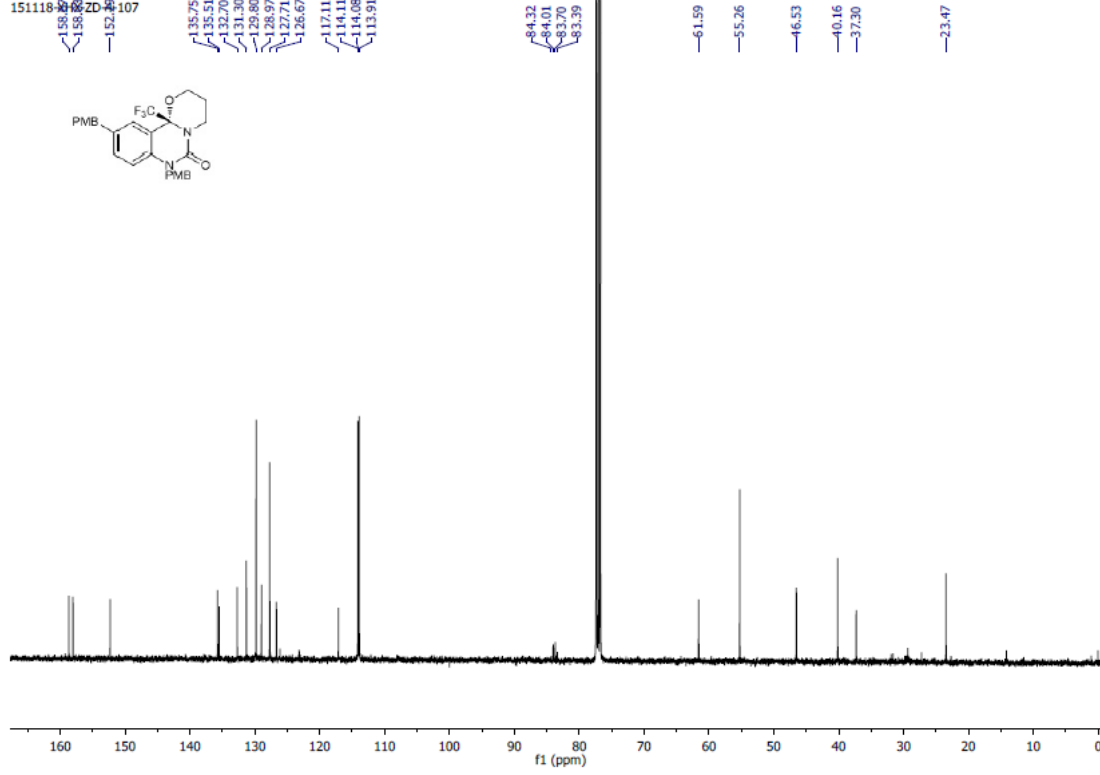



# Compounds 4f

151118-XHX-ZD-4-109

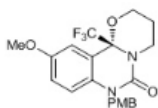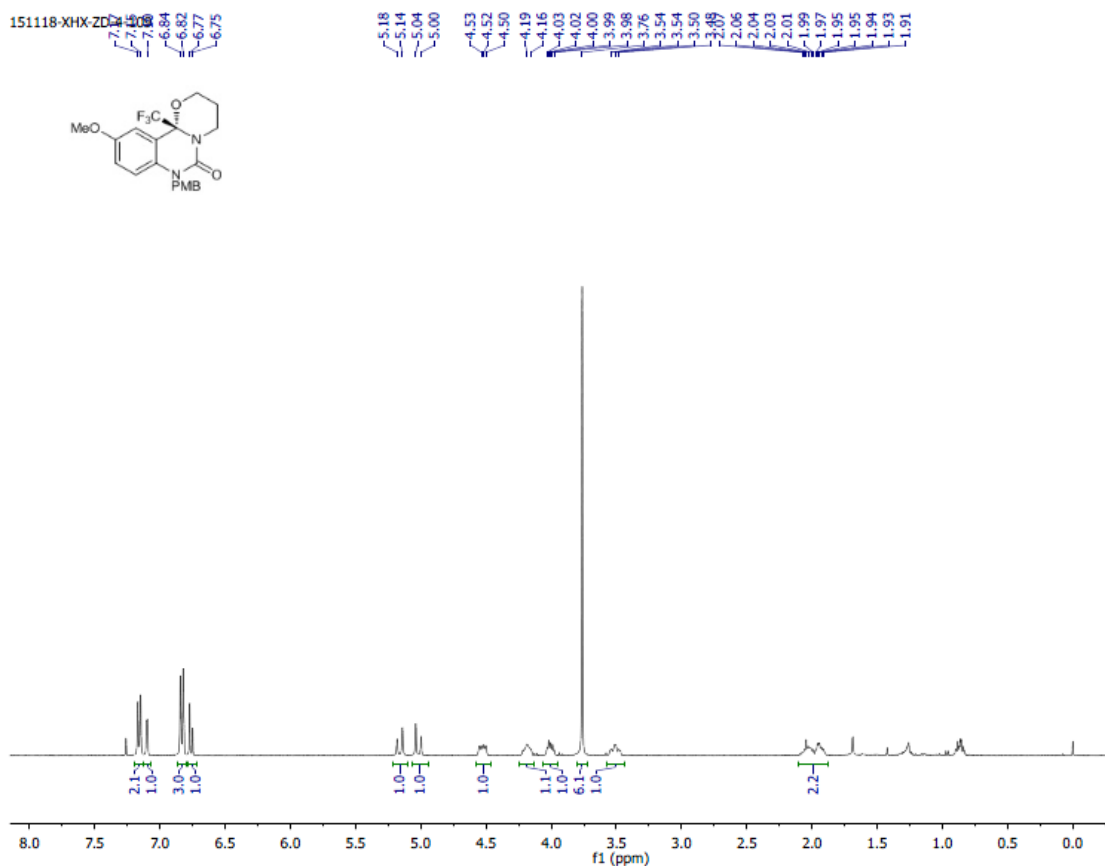

151118-XHX-ZD-4-109

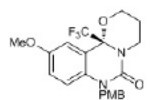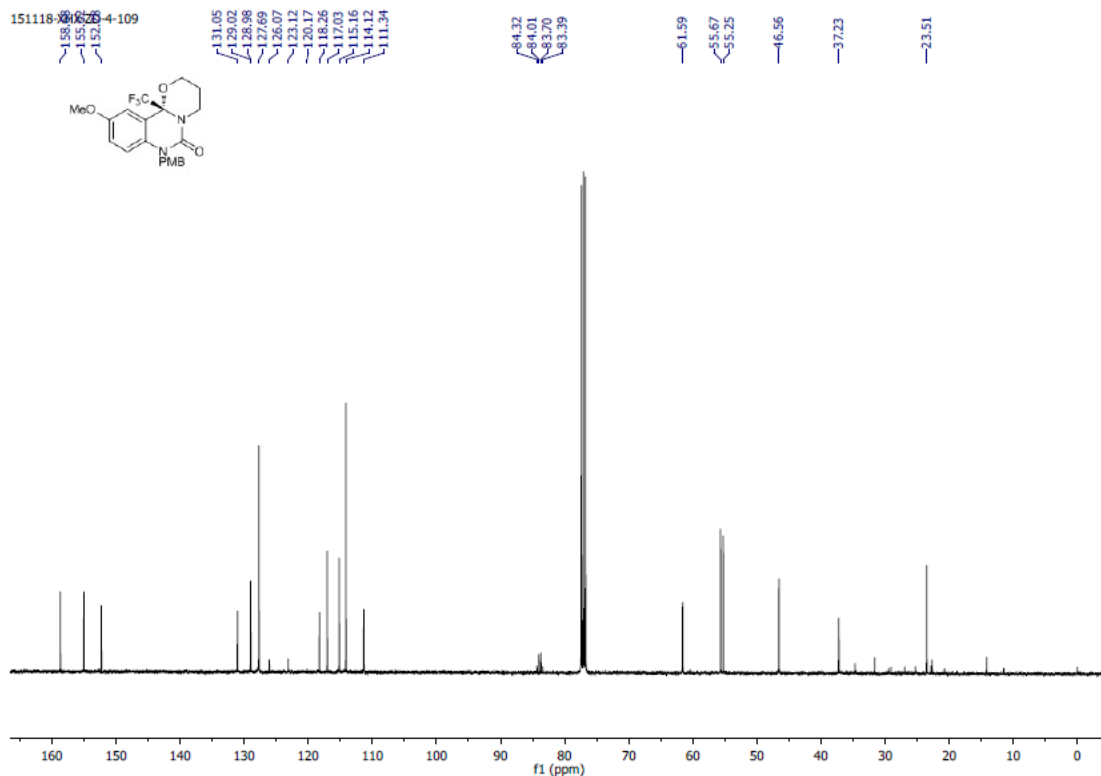

## Chiral HPLC traces

### Compound 3a

<Chromatogram>

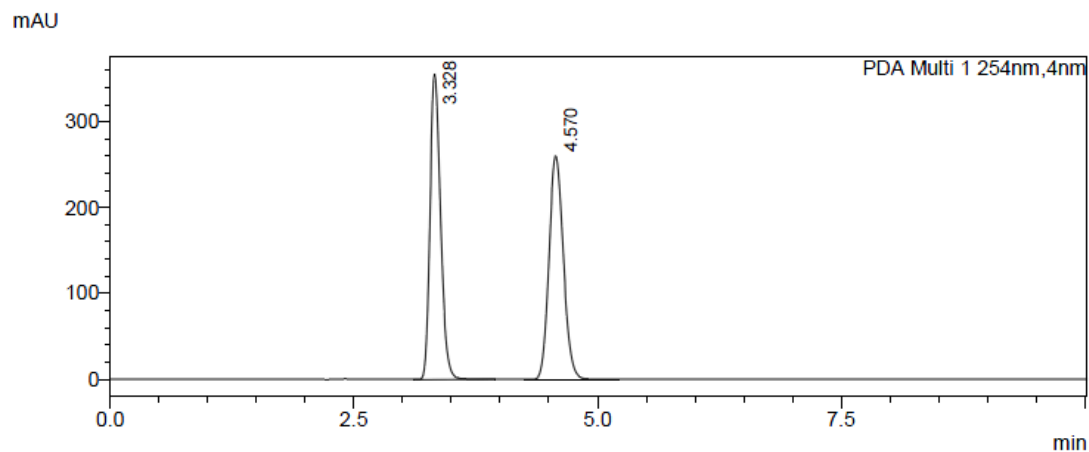

<Peak Table>

PDA Ch1 254nm

| Peak# | Ret. Time | Area    | Height | Area%   |
|-------|-----------|---------|--------|---------|
| 1     | 3.328     | 2679457 | 356870 | 50.104  |
| 2     | 4.570     | 2668297 | 260106 | 49.896  |
| 总计    |           |         |        | 100.000 |

<Chromatogram>

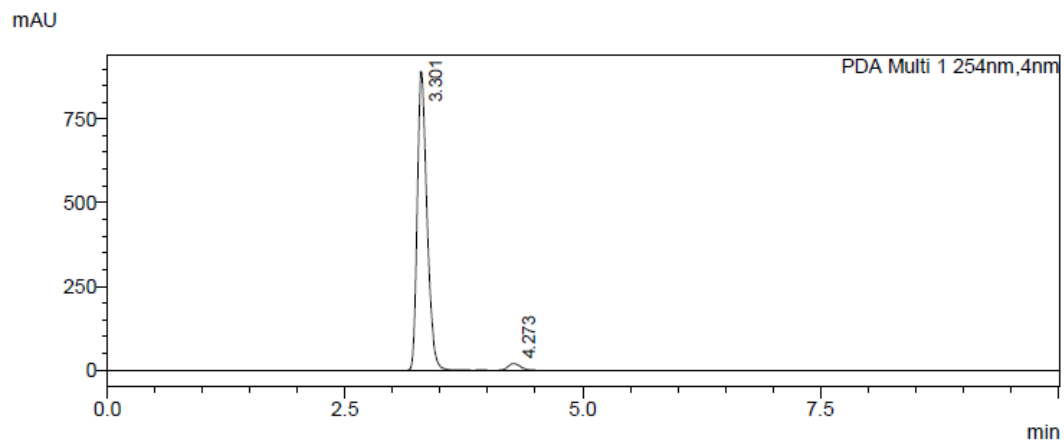

<Peak Table>

PDA Ch1 254nm

| Peak# | Ret. Time | Area    | Height | Area%   |
|-------|-----------|---------|--------|---------|
| 1     | 3.301     | 6424996 | 891479 | 97.168  |
| 2     | 4.273     | 187242  | 20543  | 2.832   |
| 总计    |           |         |        | 100.000 |

## Compound 3b

<Chromatogram>

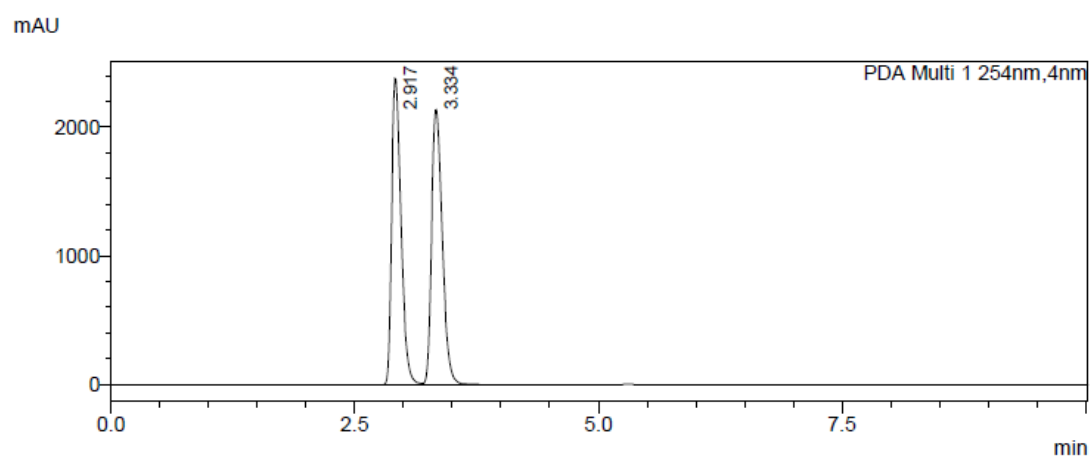

<Peak Table>

PDA Ch1 254nm

| Peak# | Ret. Time | Area     | Height  | Area%   |
|-------|-----------|----------|---------|---------|
| 1     | 2.917     | 15945210 | 2376865 | 49.502  |
| 2     | 3.334     | 16265936 | 2133918 | 50.498  |
| 总计    |           |          |         | 100.000 |

<Chromatogram>

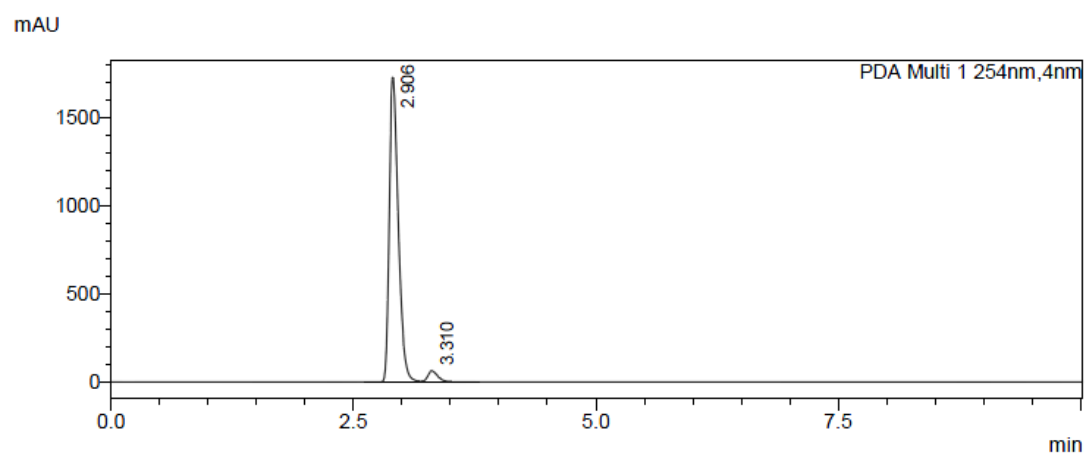

<Peak Table>

PDA Ch1 254nm

| Peak# | Ret. Time | Area     | Height  | Area%   |
|-------|-----------|----------|---------|---------|
| 1     | 2.906     | 11279846 | 1728852 | 96.050  |
| 2     | 3.310     | 463907   | 62833   | 3.950   |
| 总计    |           |          |         | 100.000 |

## Compound 3c

<Chromatogram>

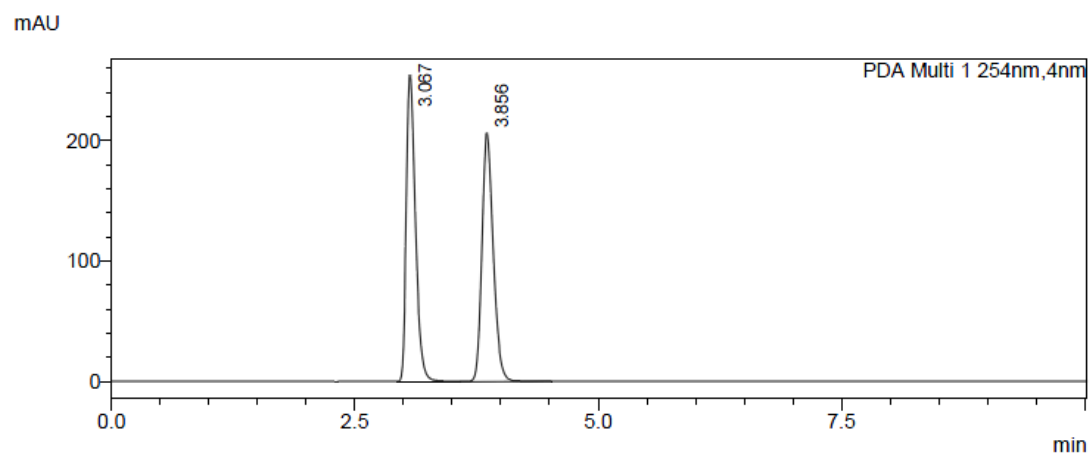

<Peak Table>

PDA Ch1 254nm

| Peak# | Ret. Time | Area    | Height | Area%   |
|-------|-----------|---------|--------|---------|
| 1     | 3.067     | 1667210 | 254067 | 49.861  |
| 2     | 3.856     | 1676518 | 206188 | 50.139  |
| 总计    |           |         |        | 100.000 |

<Chromatogram>

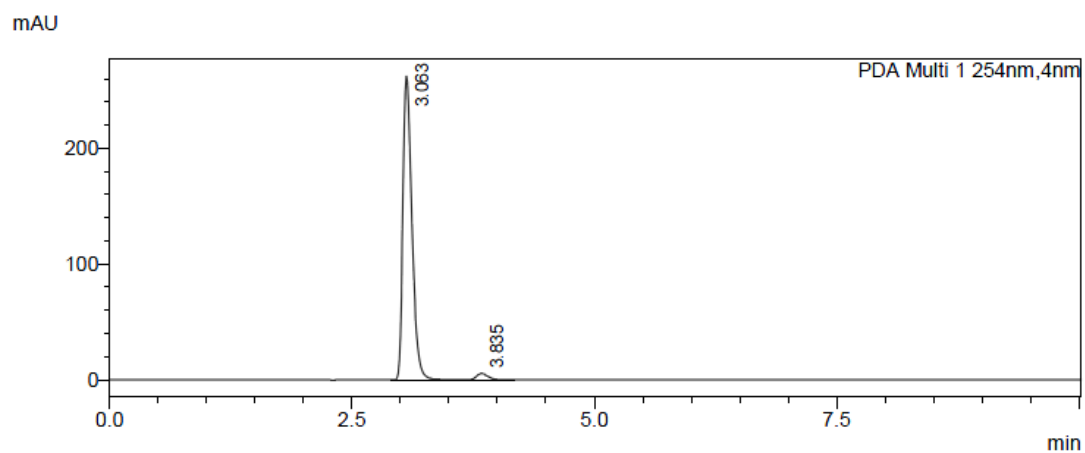

<Peak Table>

PDA Ch1 254nm

| Peak# | Ret. Time | Area    | Height | Area%   |
|-------|-----------|---------|--------|---------|
| 1     | 3.063     | 1697977 | 262948 | 97.472  |
| 2     | 3.835     | 44031   | 5596   | 2.528   |
| 总计    |           |         |        | 100.000 |

## Compound 3d

<Chromatogram>

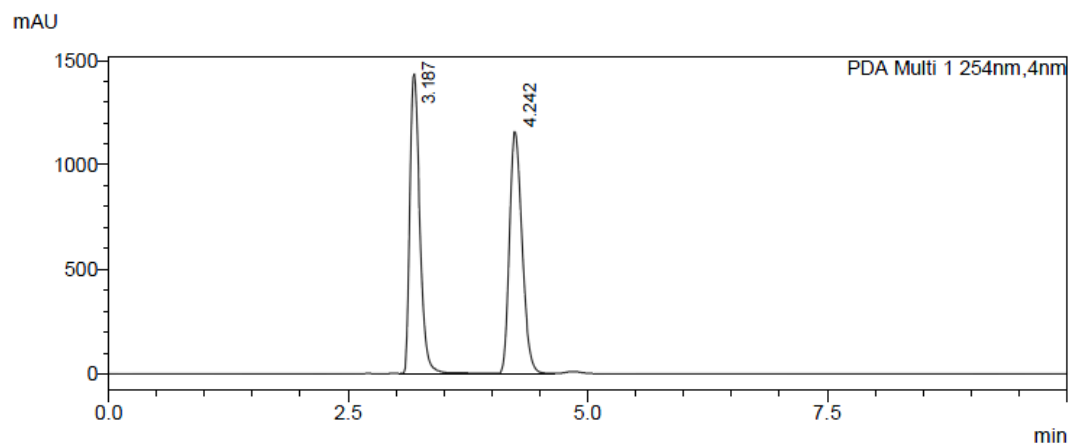

<Peak Table>

PDA Ch1 254nm

| Peak# | Ret. Time | Area     | Height  | Area%   |
|-------|-----------|----------|---------|---------|
| 1     | 3.187     | 10370913 | 1438085 | 49.254  |
| 2     | 4.242     | 10685065 | 1160789 | 50.746  |
| 总计    |           |          |         | 100.000 |

<Chromatogram>

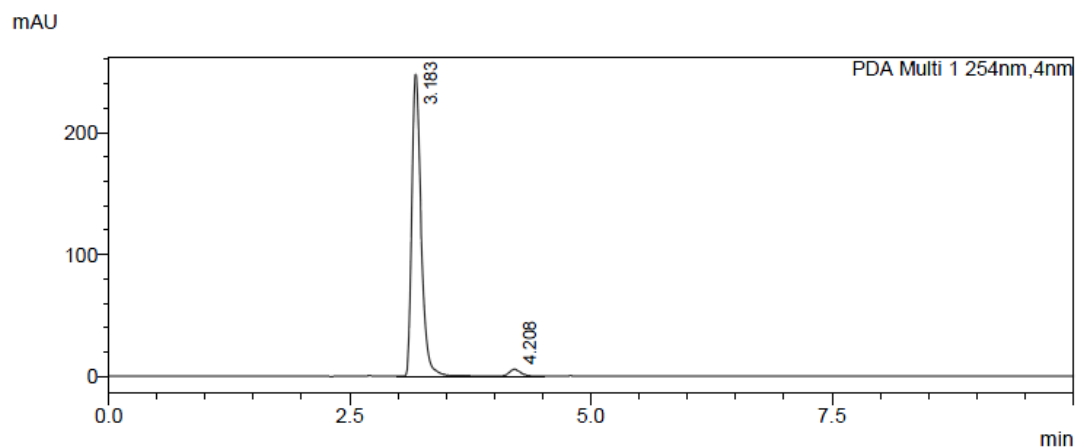

<Peak Table>

PDA Ch1 254nm

| Peak# | Ret. Time | Area    | Height | Area%   |
|-------|-----------|---------|--------|---------|
| 1     | 3.183     | 1654588 | 248106 | 97.232  |
| 2     | 4.208     | 47099   | 5593   | 2.768   |
| 总计    |           |         |        | 100.000 |

## Compound 3e

<Chromatogram>

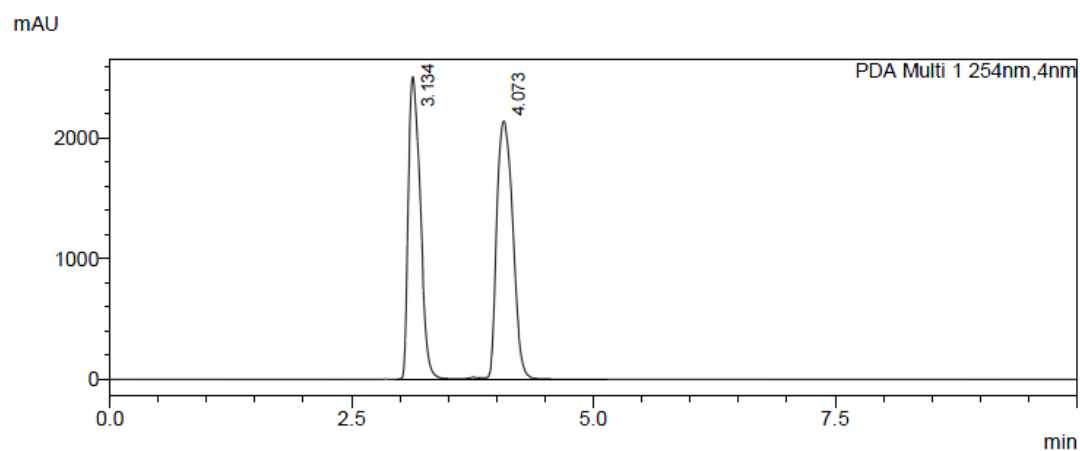

<Peak Table>

PDA Ch1 254nm

| Peak# | Ret. Time | Area     | Height  | Area%   |
|-------|-----------|----------|---------|---------|
| 1     | 3.134     | 21982308 | 2518116 | 46.997  |
| 2     | 4.073     | 24791290 | 2143477 | 53.003  |
| 总计    |           |          |         | 100.000 |

<Chromatogram>

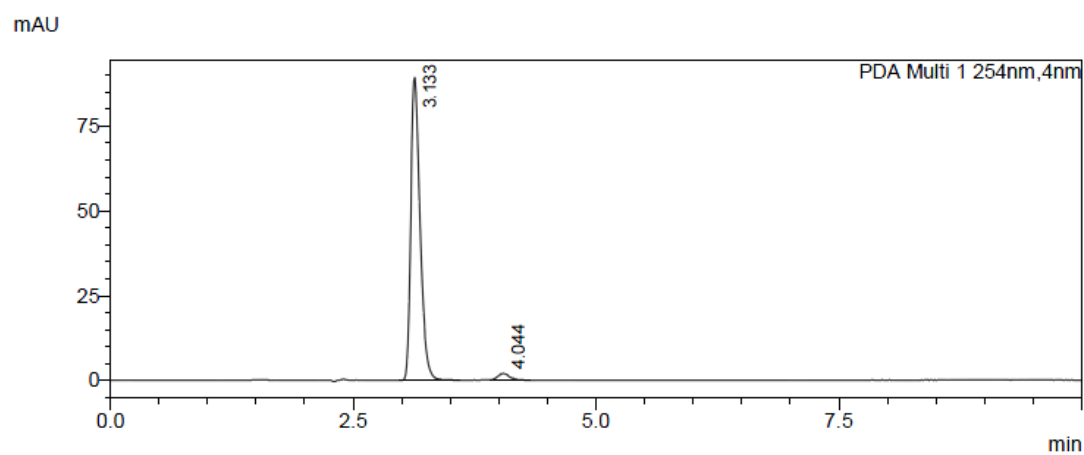

<Peak Table>

PDA Ch1 254nm

| Peak# | Ret. Time | Area   | Height | Area%   |
|-------|-----------|--------|--------|---------|
| 1     | 3.133     | 593700 | 89570  | 97.257  |
| 2     | 4.044     | 16744  | 1954   | 2.743   |
| 总计    |           |        |        | 100.000 |

## Compound 3f

<Chromatogram>

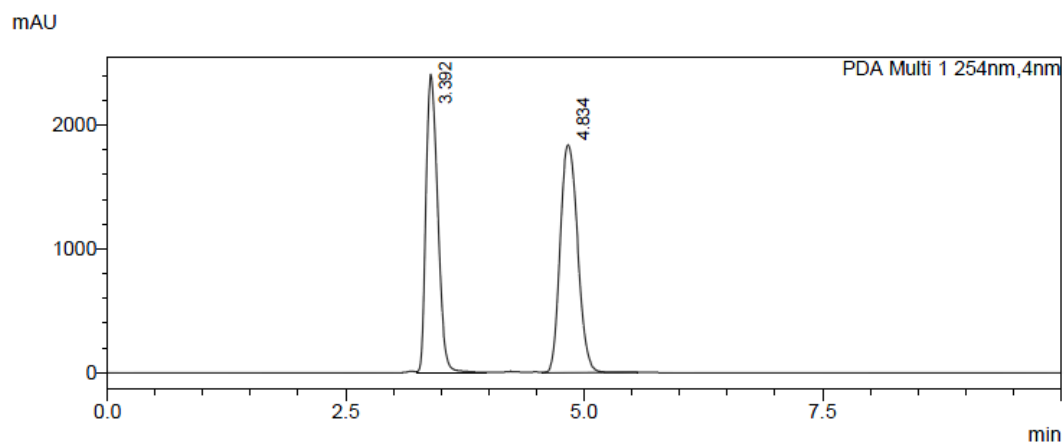

<Peak Table>

PDA Ch1 254nm

| Peak# | Ret. Time | Area     | Height  | Area%   |
|-------|-----------|----------|---------|---------|
| 1     | 3.392     | 20852470 | 2415778 | 47.036  |
| 2     | 4.834     | 23480702 | 1839435 | 52.964  |
| 总计    |           |          |         | 100.000 |

<Chromatogram>

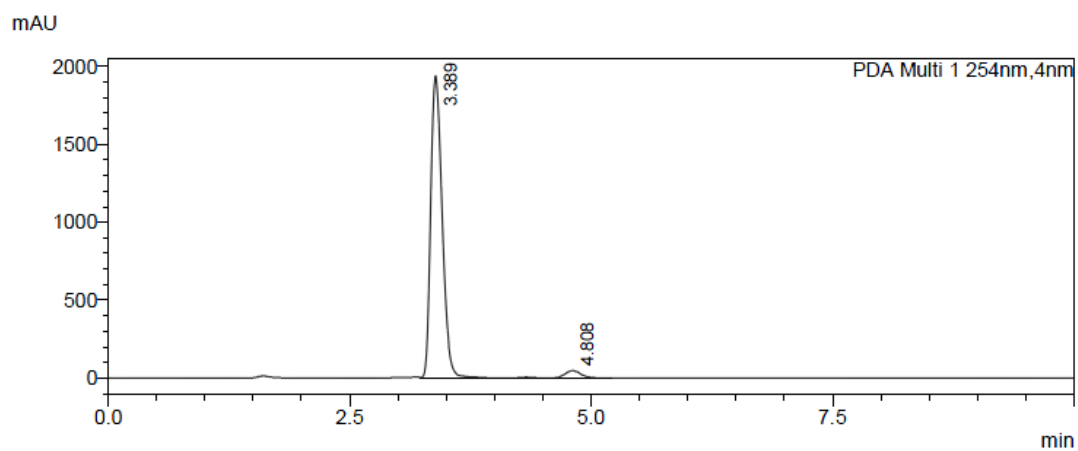

<Peak Table>

PDA Ch1 254nm

| Peak# | Ret. Time | Area     | Height  | Area%   |
|-------|-----------|----------|---------|---------|
| 1     | 3.389     | 16155503 | 1944455 | 96.821  |
| 2     | 4.808     | 530383   | 47102   | 3.179   |
| 总计    |           |          |         | 100.000 |

# Compound 3g

<Chromatogram>

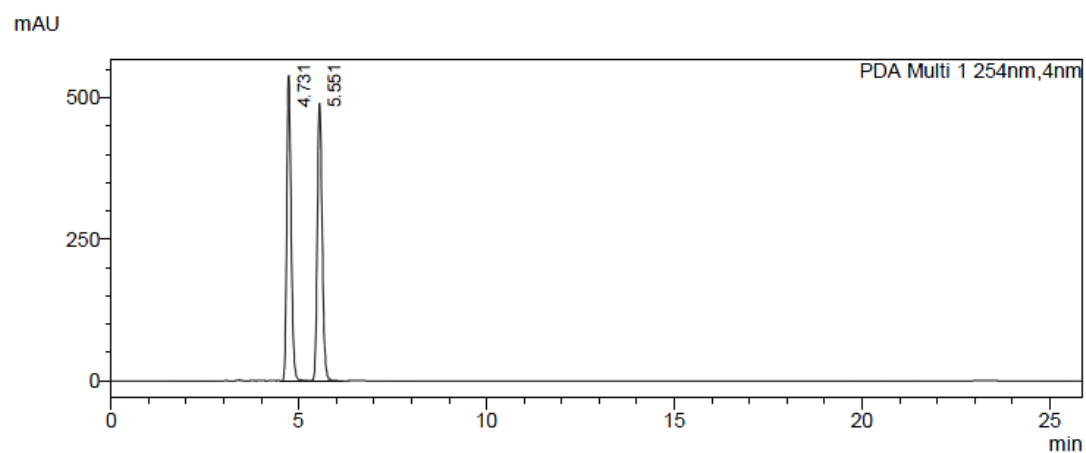

<Peak Table>

PDA Ch1 254nm

| Peak# | Ret. Time | Area    | Height | Area%   |
|-------|-----------|---------|--------|---------|
| 1     | 4.731     | 4428156 | 537494 | 50.013  |
| 2     | 5.551     | 4425913 | 490865 | 49.987  |
| 总计    |           |         |        | 100.000 |

<Chromatogram>

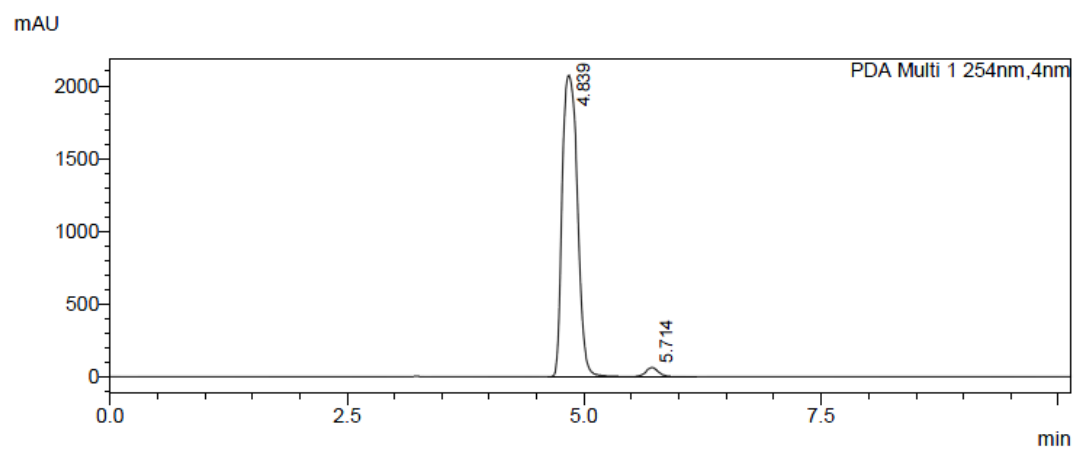

<Peak Table>

PDA Ch1 254nm

| Peak# | Ret. Time | Area     | Height  | Area%   |
|-------|-----------|----------|---------|---------|
| 1     | 4.839     | 23244096 | 2072219 | 97.482  |
| 2     | 5.714     | 600394   | 62140   | 2.518   |
| 总计    |           |          |         | 100.000 |



**Compound 3h**  
<Chromatogram>

mAU

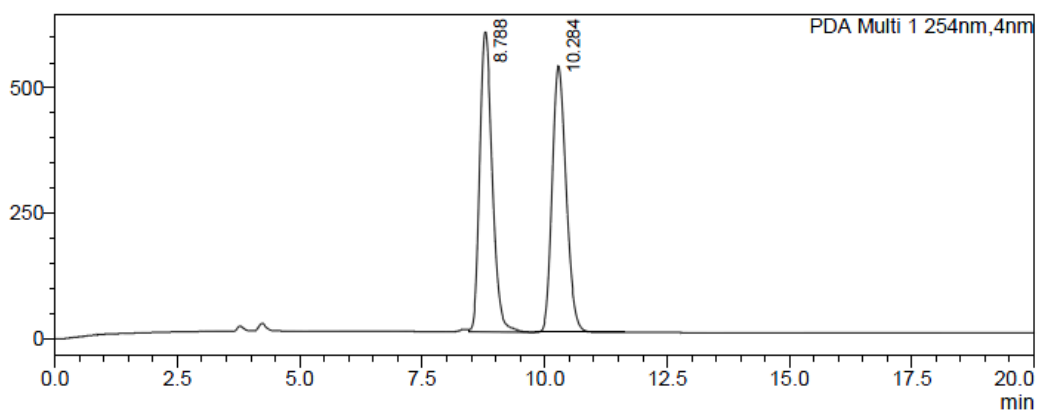

<Peak Table>

PDA Ch1 254nm

| Peak# | Ret. Time | Area     | Height | Area%   |
|-------|-----------|----------|--------|---------|
| 1     | 8.788     | 10684770 | 598606 | 50.205  |
| 2     | 10.284    | 10597427 | 532201 | 49.795  |
| 总计    |           |          |        | 100.000 |

<Chromatogram>

mAU

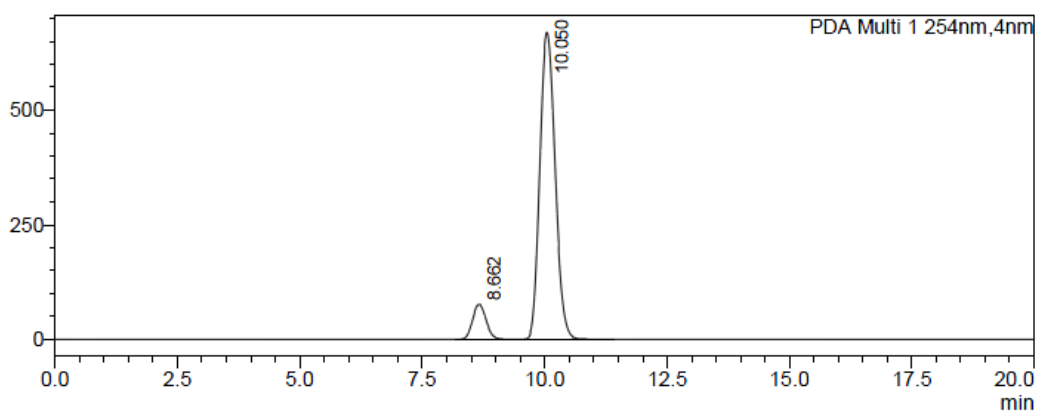

<Peak Table>

PDA Ch1 254nm

| Peak# | Ret. Time | Area     | Height | Area%   |
|-------|-----------|----------|--------|---------|
| 1     | 8.662     | 1461326  | 75962  | 9.116   |
| 2     | 10.050    | 14568950 | 669552 | 90.884  |
| 总计    |           |          |        | 100.000 |

### Compound 3i

<Chromatogram>

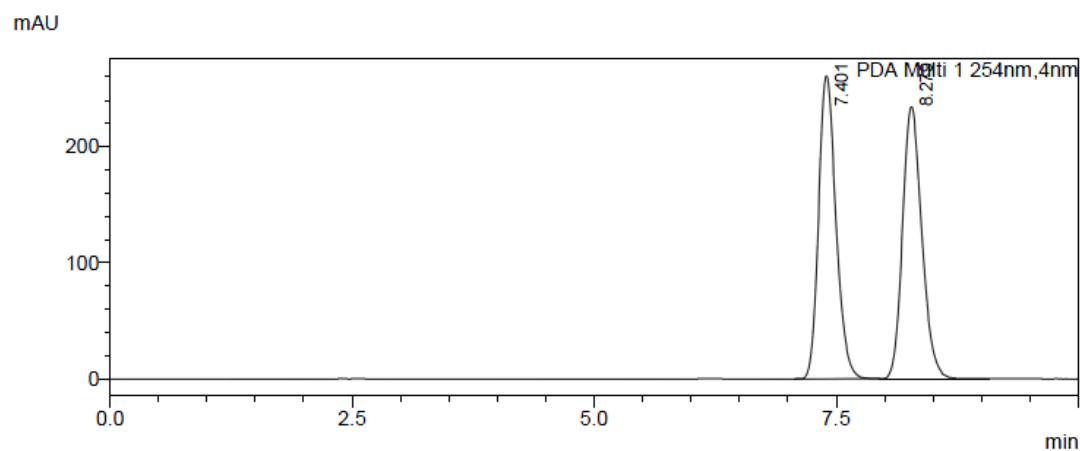

<Peak Table>

PDA Ch1 254nm

| Peak# | Ret. Time | Area    | Height | Area%   |
|-------|-----------|---------|--------|---------|
| 1     | 7.401     | 3248698 | 261437 | 49.956  |
| 2     | 8.279     | 3254389 | 234626 | 50.044  |
| 总计    |           |         |        | 100.000 |

<Chromatogram>

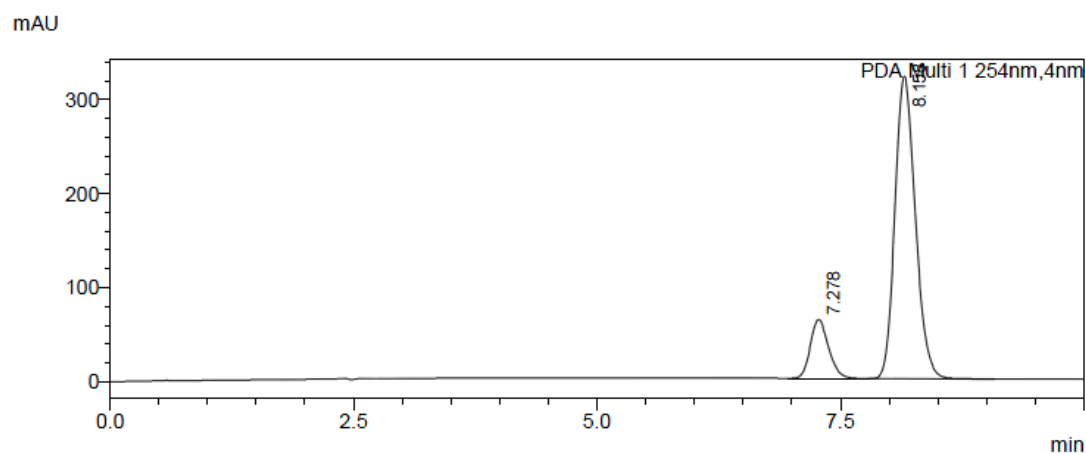

<Peak Table>

PDA Ch1 254nm

| Peak# | Ret. Time | Area    | Height | Area%   |
|-------|-----------|---------|--------|---------|
| 1     | 7.278     | 813074  | 62397  | 14.760  |
| 2     | 8.158     | 4695390 | 321704 | 85.240  |
| 总计    |           |         |        | 100.000 |

### Compound 3j

<Chromatogram>

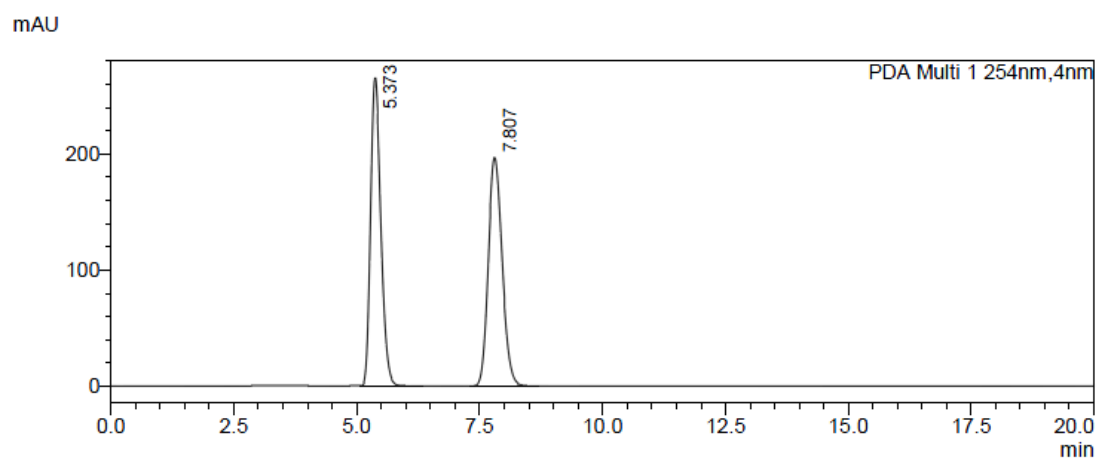

<Peak Table>

PDA Ch1 254nm

| Peak# | Ret. Time | Area    | Height | Area%   |
|-------|-----------|---------|--------|---------|
| 1     | 5.373     | 3851777 | 265524 | 49.968  |
| 2     | 7.807     | 3856675 | 196612 | 50.032  |
| 总计    |           |         |        | 100.000 |

<Chromatogram>

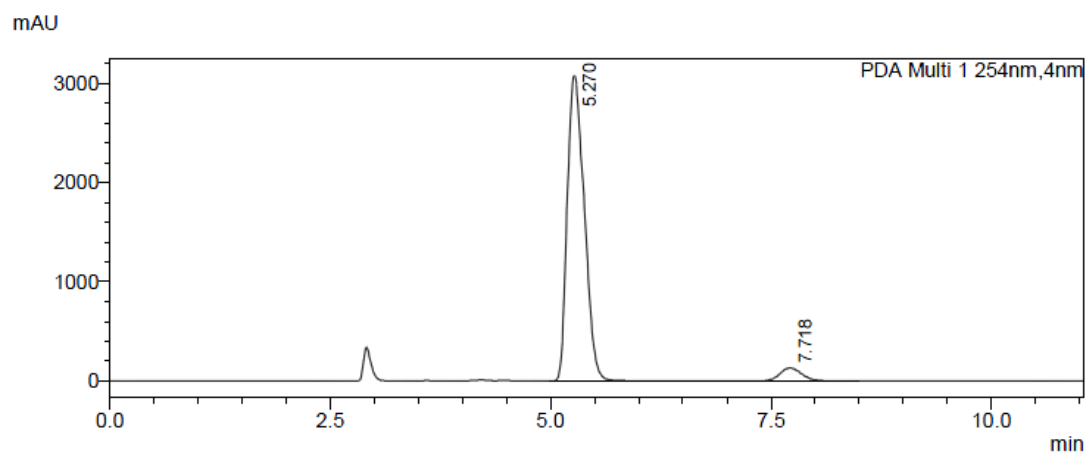

<Peak Table>

PDA Ch1 254nm

| Peak# | Ret. Time | Area     | Height  | Area%   |
|-------|-----------|----------|---------|---------|
| 1     | 5.270     | 41374805 | 3078867 | 94.844  |
| 2     | 7.718     | 2249080  | 130768  | 5.156   |
| 总计    |           |          |         | 100.000 |

## Compound 3k

<Chromatogram>

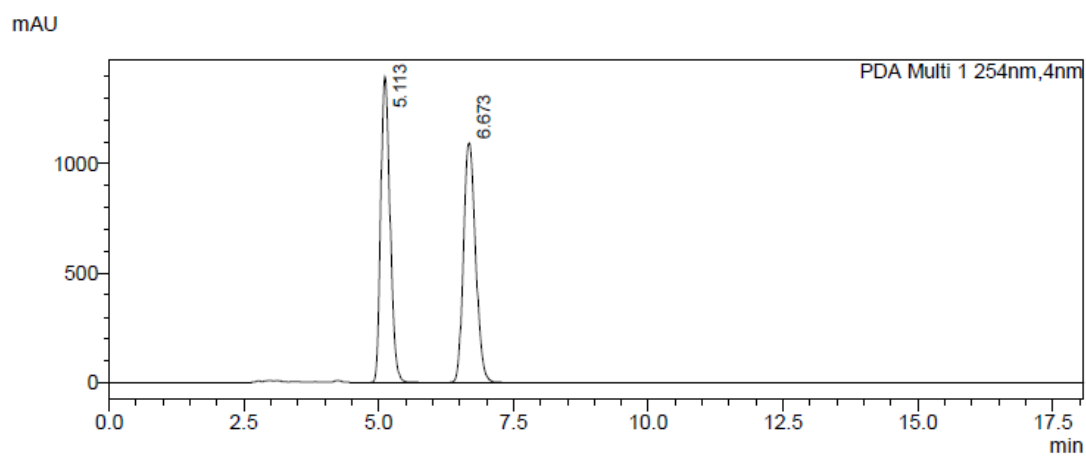

<Peak Table>

PDA Ch1 254nm

| Peak# | Ret. Time | Area     | Height  | Area%   |
|-------|-----------|----------|---------|---------|
| 1     | 5.113     | 16913081 | 1398828 | 49.637  |
| 2     | 6.673     | 17160656 | 1094267 | 50.363  |
| 总计    |           |          |         | 100.000 |

<Chromatogram>

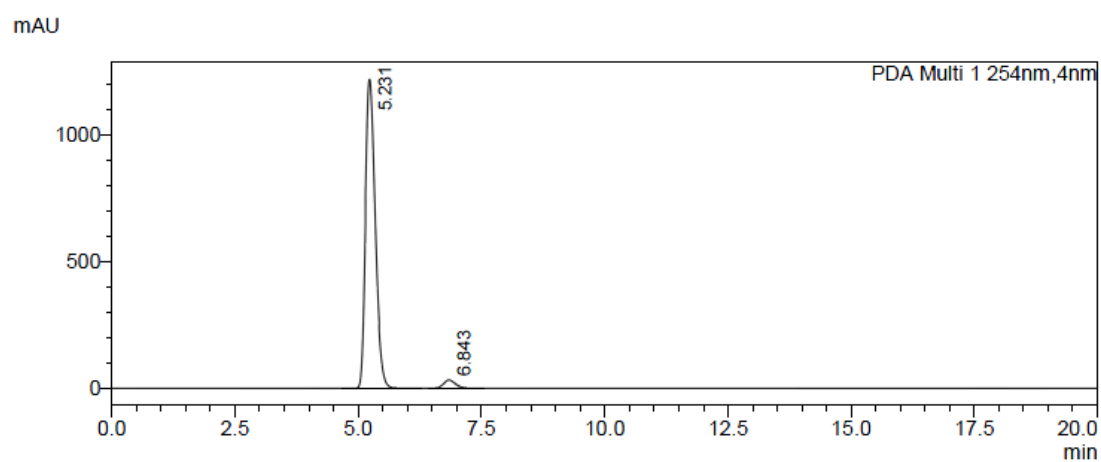

<Peak Table>

PDA Ch1 254nm

| Peak# | Ret. Time | Area     | Height  | Area%   |
|-------|-----------|----------|---------|---------|
| 1     | 5.231     | 16861876 | 1220453 | 96.834  |
| 2     | 6.843     | 551253   | 32749   | 3.166   |
| 总计    |           |          |         | 100.000 |

### Compound 3l

<Chromatogram>

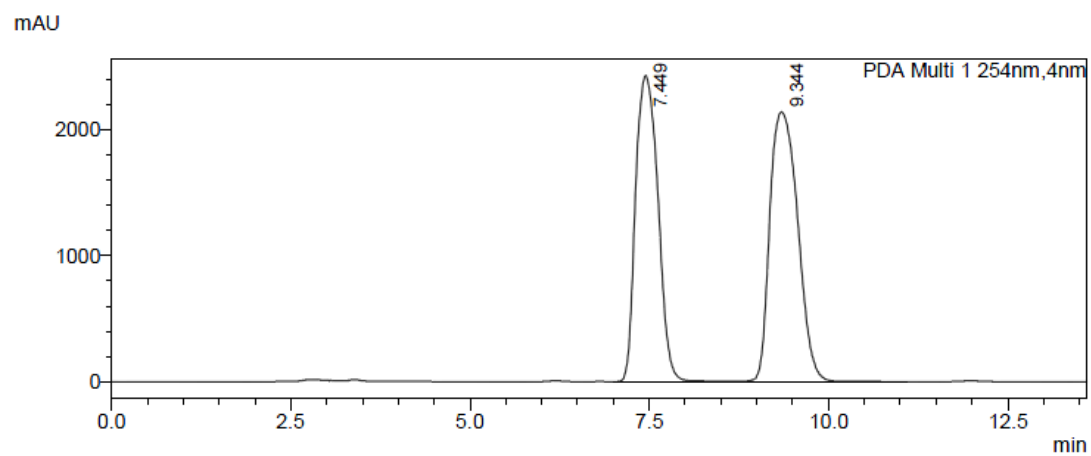

<Peak Table>

PDA Ch1 254nm

| Peak# | Ret. Time | Area     | Height  | Area%   |
|-------|-----------|----------|---------|---------|
| 1     | 7.449     | 52964063 | 2427018 | 47.719  |
| 2     | 9.344     | 58026448 | 2139130 | 52.281  |
| 总计    |           |          |         | 100.000 |

<Chromatogram>

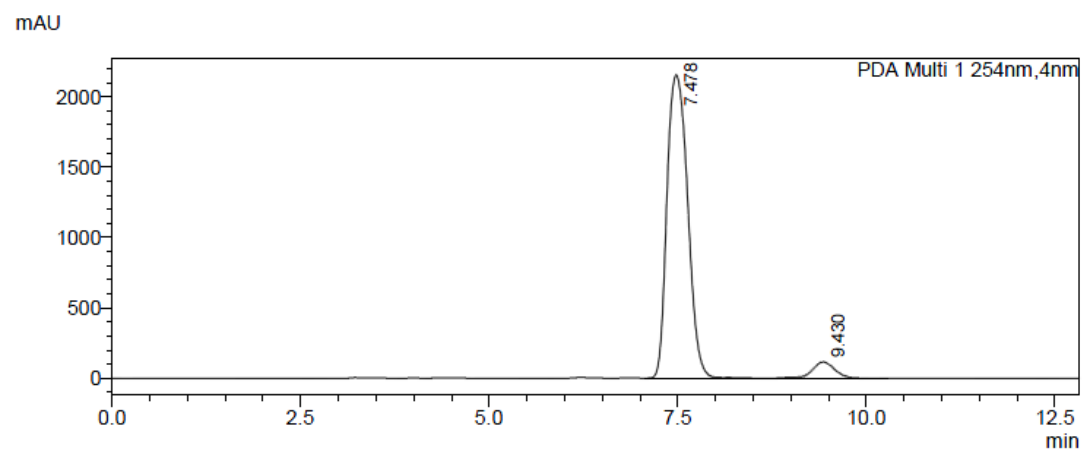

<Peak Table>

PDA Ch1 254nm

| Peak# | Ret. Time | Area     | Height  | Area%   |
|-------|-----------|----------|---------|---------|
| 1     | 7.478     | 41297292 | 2154650 | 94.398  |
| 2     | 9.430     | 2450668  | 115902  | 5.602   |
| 总计    |           |          |         | 100.000 |

## Compound 3m

<Chromatogram>

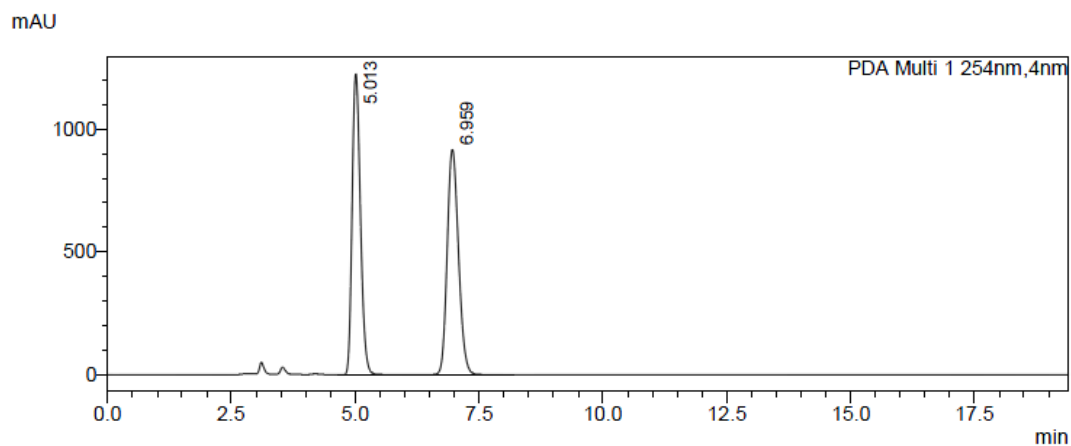

<Peak Table>

PDA Ch1 254nm

| Peak# | Ret. Time | Area     | Height  | Area%   |
|-------|-----------|----------|---------|---------|
| 1     | 5.013     | 14204989 | 1227290 | 49.548  |
| 2     | 6.959     | 14464428 | 916759  | 50.452  |
| 总计    |           |          |         | 100.000 |

<Chromatogram>

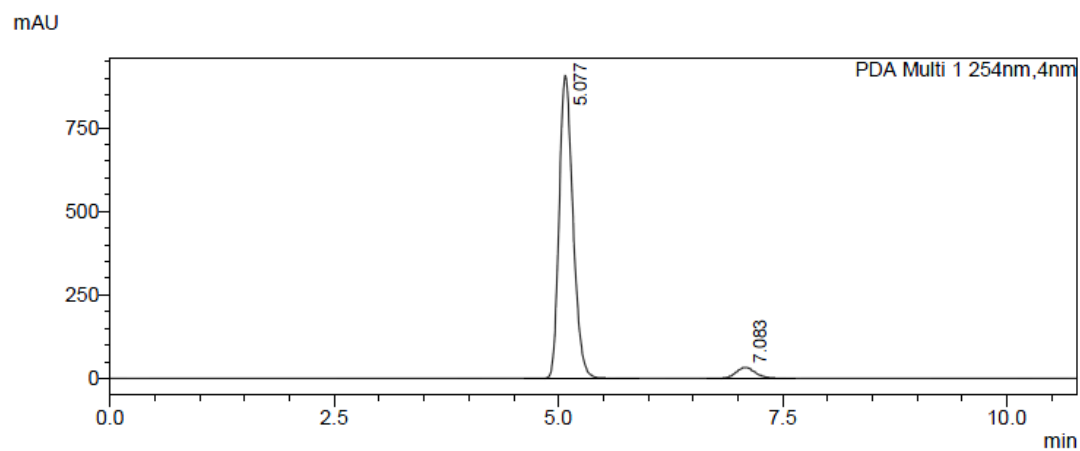

<Peak Table>

PDA Ch1 254nm

| Peak# | Ret. Time | Area    | Height | Area%   |
|-------|-----------|---------|--------|---------|
| 1     | 5.077     | 9708571 | 908832 | 95.220  |
| 2     | 7.083     | 487390  | 32698  | 4.780   |
| 总计    |           |         |        | 100.000 |

## Compound 3n

<Chromatogram>

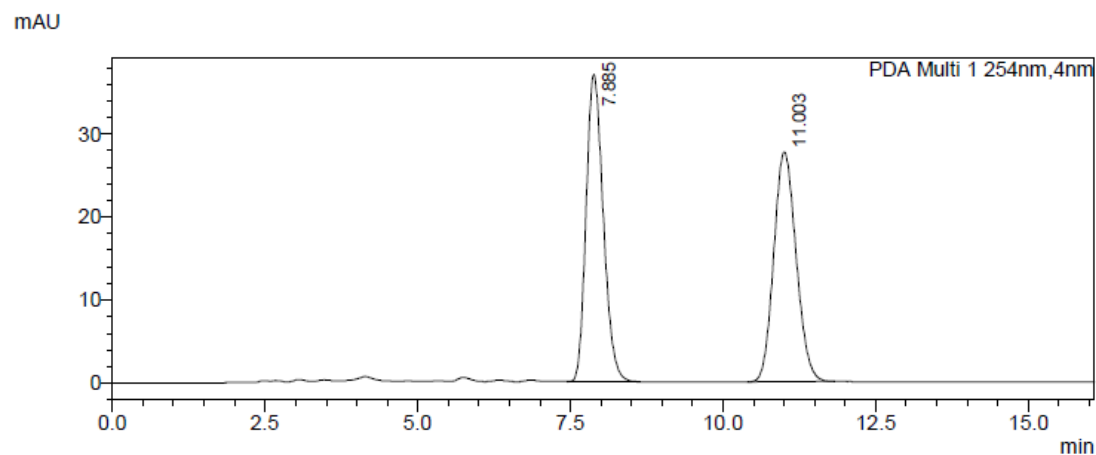

<Peak Table>

PDA Ch1 254nm

| Peak# | Ret. Time | Area   | Height | Area%   |
|-------|-----------|--------|--------|---------|
| 1     | 7.885     | 722862 | 36992  | 50.609  |
| 2     | 11.003    | 705475 | 27694  | 49.391  |
| 总计    |           |        |        | 100.000 |

<Chromatogram>

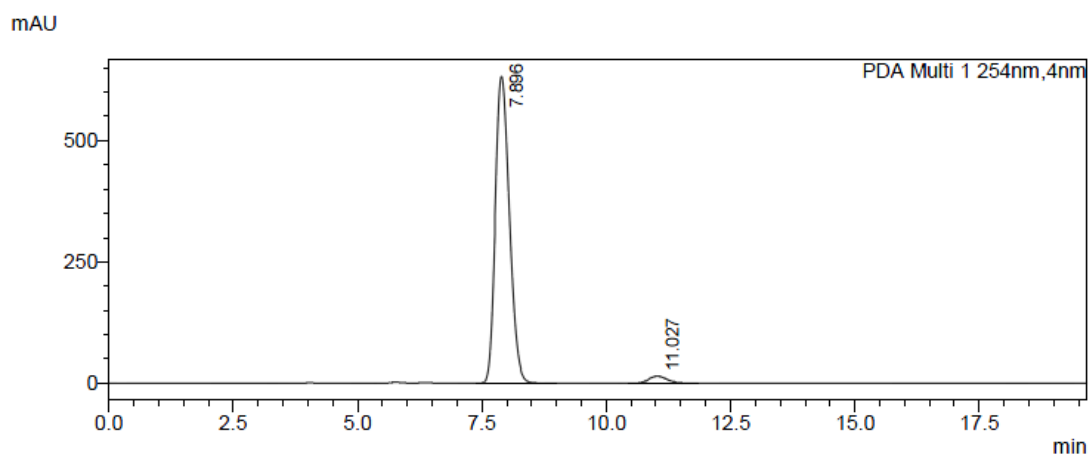

<Peak Table>

PDA Ch1 254nm

| Peak# | Ret. Time | Area     | Height | Area%   |
|-------|-----------|----------|--------|---------|
| 1     | 7.896     | 12474919 | 632592 | 97.108  |
| 2     | 11.027    | 371456   | 14542  | 2.892   |
| 总计    |           |          |        | 100.000 |

## Compound 3o

<Chromatogram>

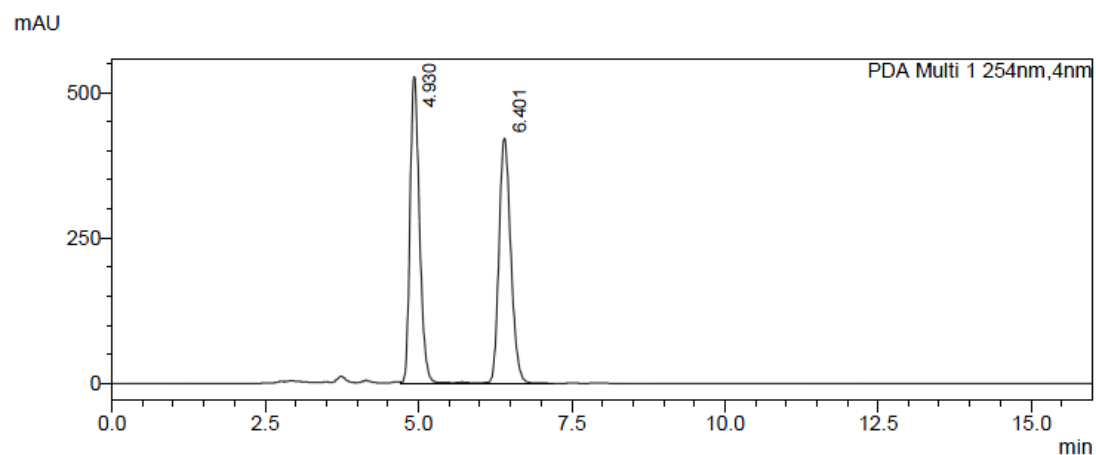

<Peak Table>

PDA Ch1 254nm

| Peak# | Ret. Time | Area    | Height | Area%   |
|-------|-----------|---------|--------|---------|
| 1     | 4.930     | 5692070 | 528914 | 50.271  |
| 2     | 6.401     | 5630706 | 421913 | 49.729  |
| 总计    |           |         |        | 100.000 |

<Chromatogram>

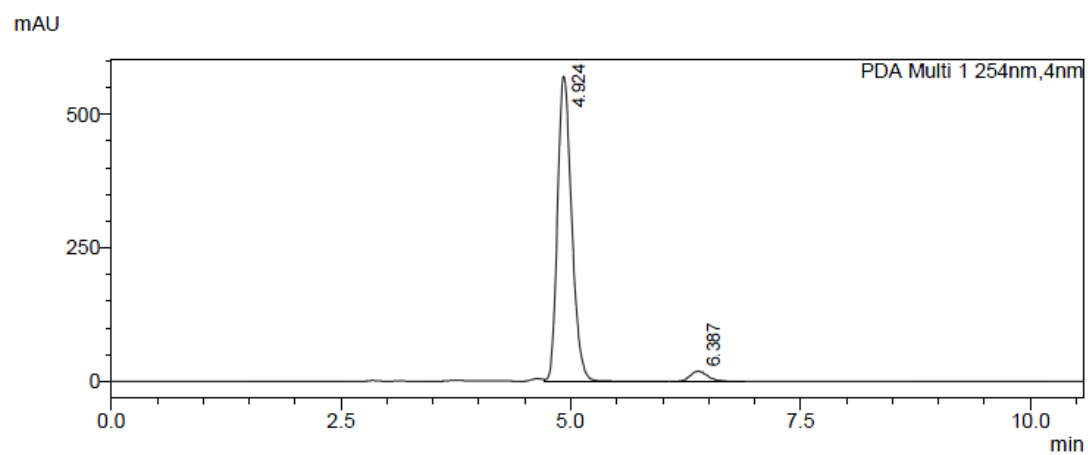

<Peak Table>

PDA Ch1 254nm

| Peak# | Ret. Time | Area    | Height | Area%   |
|-------|-----------|---------|--------|---------|
| 1     | 4.924     | 6114310 | 571648 | 96.099  |
| 2     | 6.387     | 248197  | 18831  | 3.901   |
| 总计    |           |         |        | 100.000 |



## Compound 3p

<Chromatogram>

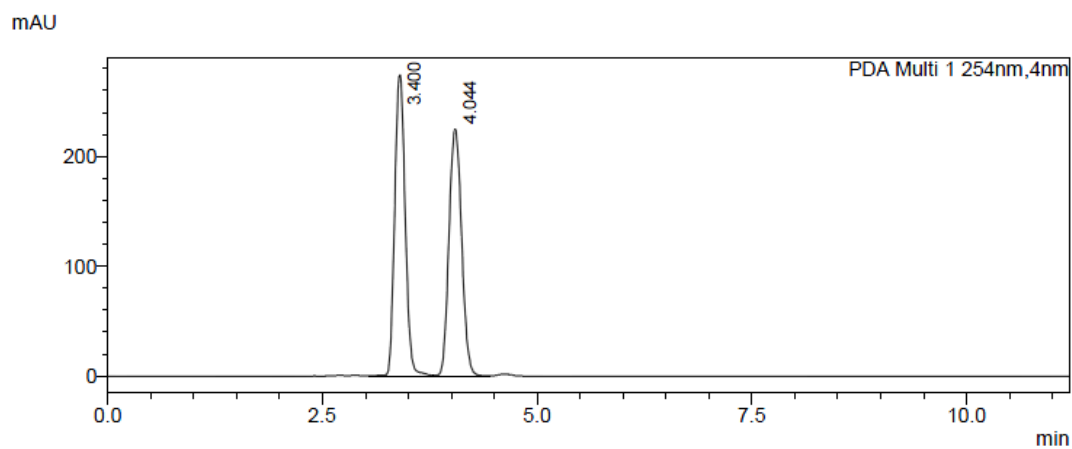

<Peak Table>

PDA Ch1 254nm

| Peak# | Ret. Time | Area    | Height | Area%   |
|-------|-----------|---------|--------|---------|
| 1     | 3.400     | 2348942 | 274808 | 50.293  |
| 2     | 4.044     | 2321609 | 225196 | 49.707  |
| 总计    |           |         |        | 100.000 |

<Chromatogram>

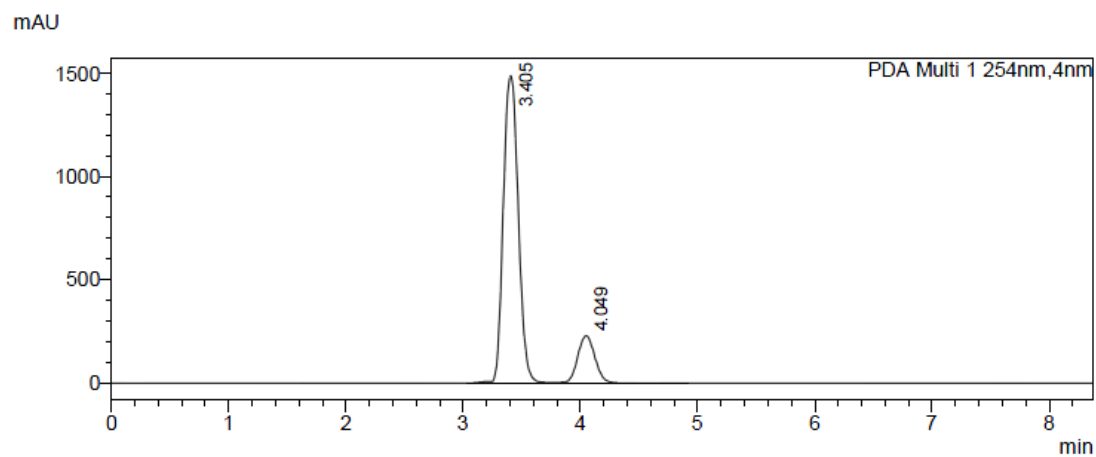

<Peak Table>

PDA Ch1 254nm

| Peak# | Ret. Time | Area     | Height  | Area%   |
|-------|-----------|----------|---------|---------|
| 1     | 3.405     | 13292486 | 1491315 | 84.906  |
| 2     | 4.049     | 2362977  | 228863  | 15.094  |
| 总计    |           |          |         | 100.000 |

## Compound 3q

<Chromatogram>

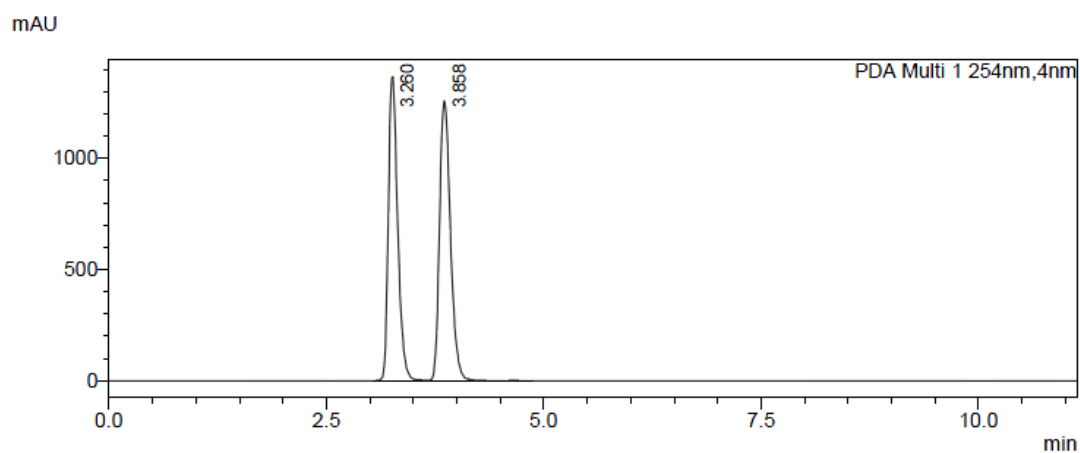

<Peak Table>

PDA Ch1 254nm

| Peak# | Ret. Time | Area     | Height  | Area%   |
|-------|-----------|----------|---------|---------|
| 1     | 3.260     | 10214511 | 1368051 | 48.103  |
| 2     | 3.858     | 11020197 | 1258738 | 51.897  |
| 总计    |           |          |         | 100.000 |

<Chromatogram>

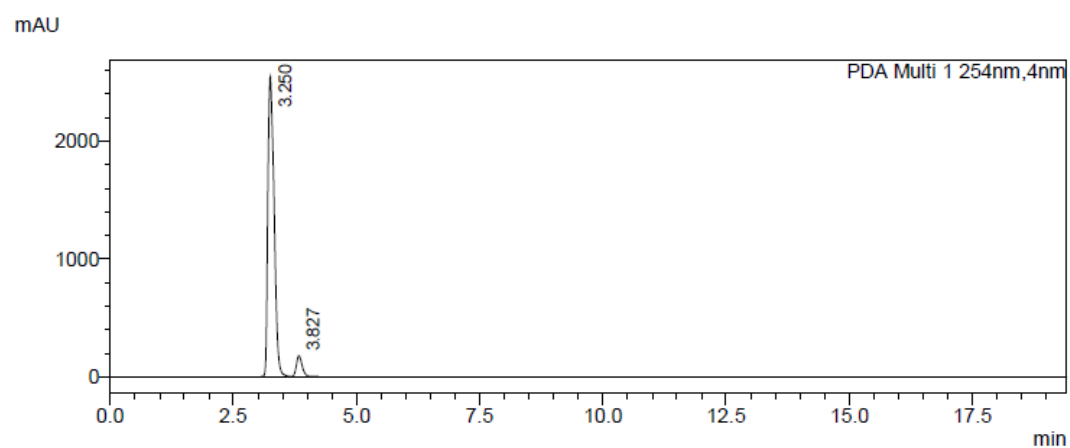

<Peak Table>

PDA Ch1 254nm

| Peak# | Ret. Time | Area     | Height  | Area%   |
|-------|-----------|----------|---------|---------|
| 1     | 3.250     | 22447632 | 2549752 | 93.558  |
| 2     | 3.827     | 1545577  | 179958  | 6.442   |
| 总计    |           |          |         | 100.000 |

## Compound 3r

<Chromatogram>

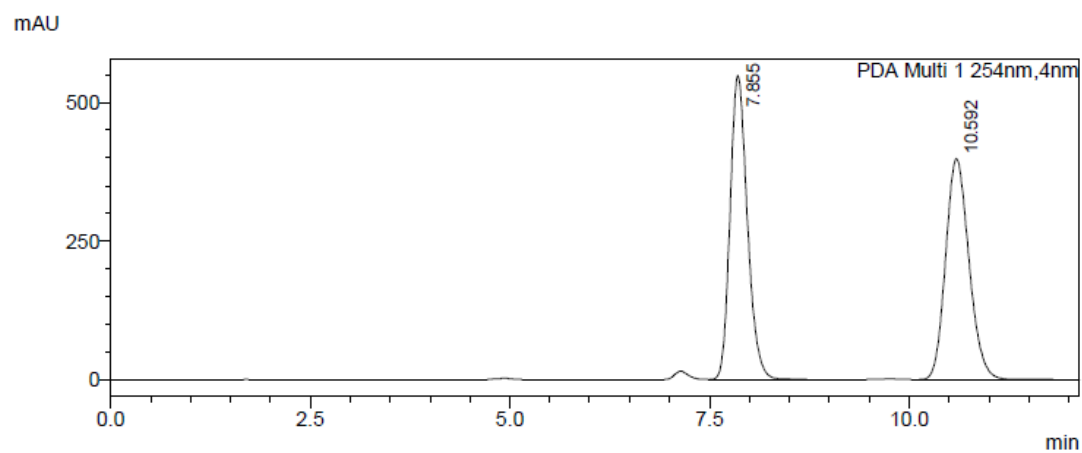

<Peak Table>

PDA Ch1 254nm

| Peak# | Ret. Time | Area    | Height | Area%   |
|-------|-----------|---------|--------|---------|
| 1     | 7.855     | 8284141 | 547975 | 50.450  |
| 2     | 10.592    | 8136219 | 398577 | 49.550  |
| 总计    |           |         |        | 100.000 |

<Chromatogram>

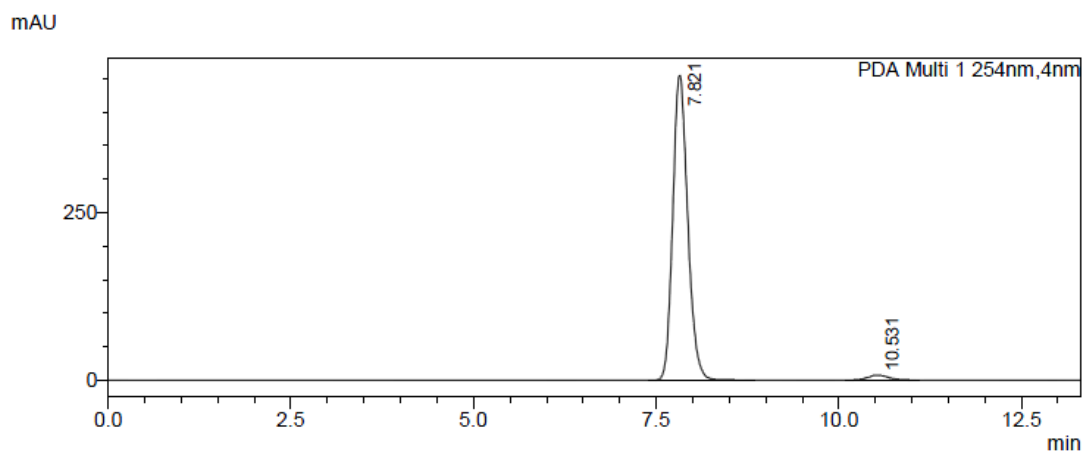

<Peak Table>

PDA Ch1 254nm

| Peak# | Ret. Time | Area    | Height | Area%   |
|-------|-----------|---------|--------|---------|
| 1     | 7.821     | 6482209 | 455852 | 97.823  |
| 2     | 10.531    | 144232  | 7383   | 2.177   |
| 总计    |           |         |        | 100.000 |

### Compound 3s

<Chromatogram>

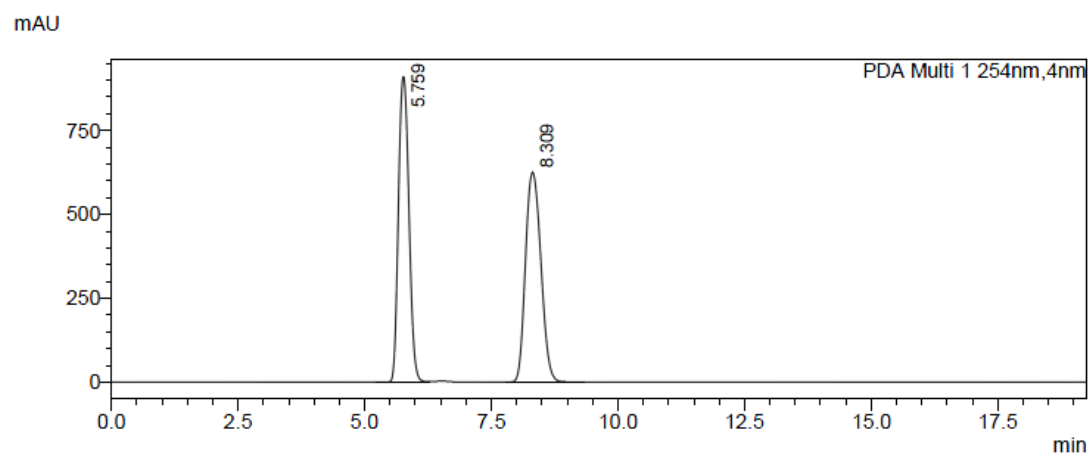

<Peak Table>

PDA Ch1 254nm

| Peak# | Ret. Time | Area     | Height | Area%   |
|-------|-----------|----------|--------|---------|
| 1     | 5.759     | 13083073 | 912008 | 49.698  |
| 2     | 8.309     | 13242070 | 624540 | 50.302  |
| 总计    |           |          |        | 100.000 |

<Chromatogram>

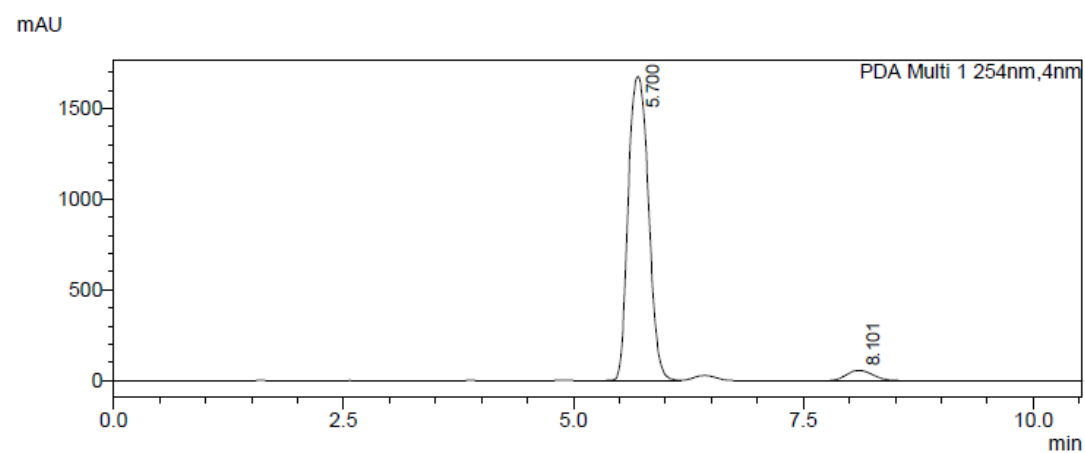

<Peak Table>

PDA Ch1 254nm

| Peak# | Ret. Time | Area     | Height  | Area%   |
|-------|-----------|----------|---------|---------|
| 1     | 5.700     | 25617367 | 1675349 | 95.766  |
| 2     | 8.101     | 1132459  | 56117   | 4.234   |
| 总计    |           |          |         | 100.000 |

## Compound 3t

<Chromatogram>

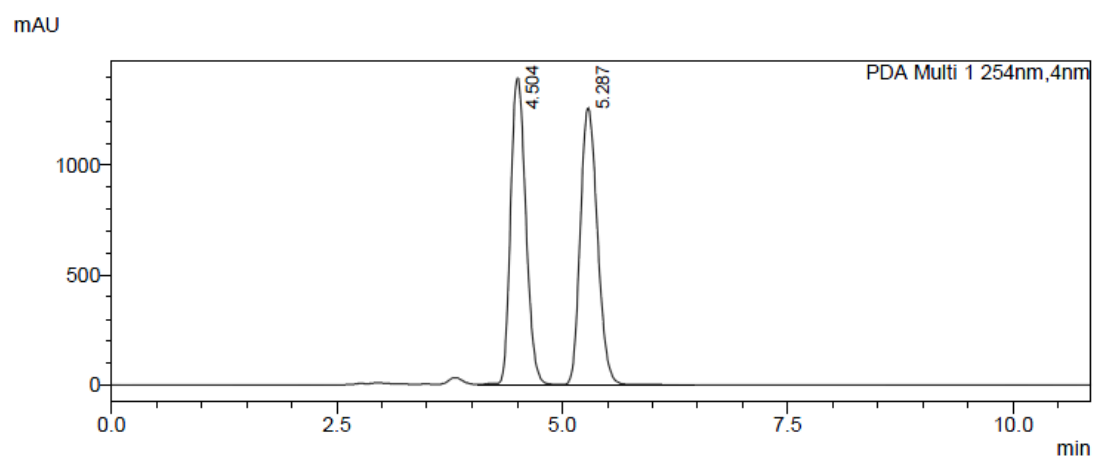

<Peak Table>

PDA Ch1 254nm

| Peak# | Ret. Time | Area     | Height  | Area%   |
|-------|-----------|----------|---------|---------|
| 1     | 4.504     | 16486120 | 1398351 | 49.681  |
| 2     | 5.287     | 16697535 | 1259670 | 50.319  |
| 总计    |           |          |         | 100.000 |

<Chromatogram>

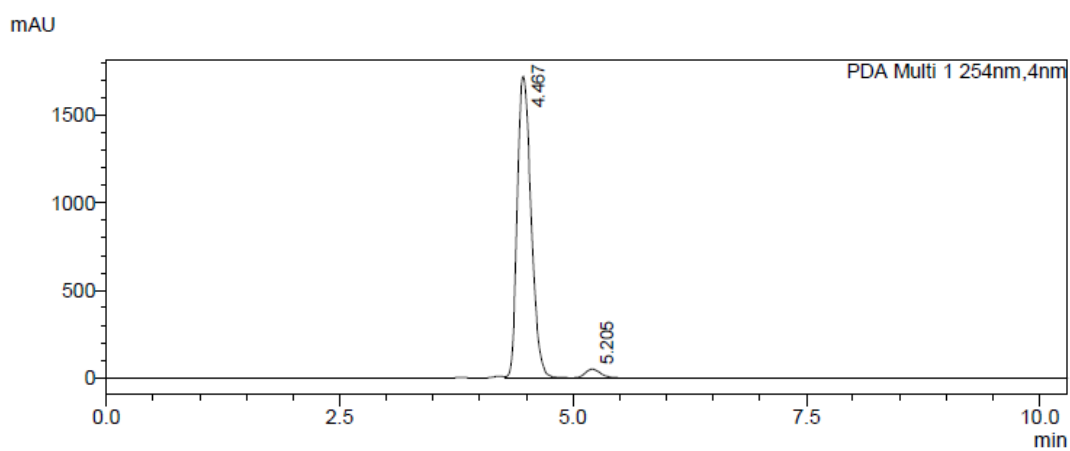

<Peak Table>

PDA Ch1 254nm

| Peak# | Ret. Time | Area     | Height  | Area%   |
|-------|-----------|----------|---------|---------|
| 1     | 4.467     | 17834472 | 1721124 | 96.731  |
| 2     | 5.205     | 602623   | 51385   | 3.269   |
| 总计    |           |          |         | 100.000 |

## Compound 4a

<Chromatogram>

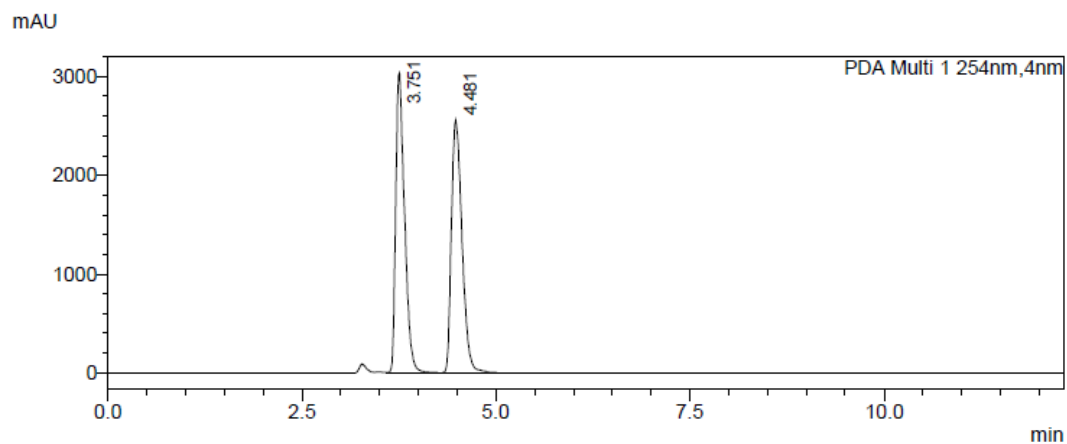

<Peak Table>

PDA Ch1 254nm

| Peak# | Ret. Time | Area     | Height  | Area%   |
|-------|-----------|----------|---------|---------|
| 1     | 3.751     | 24002137 | 3036102 | 49.554  |
| 2     | 4.481     | 24434081 | 2556365 | 50.446  |
| 总计    |           |          |         | 100.000 |

<Chromatogram>

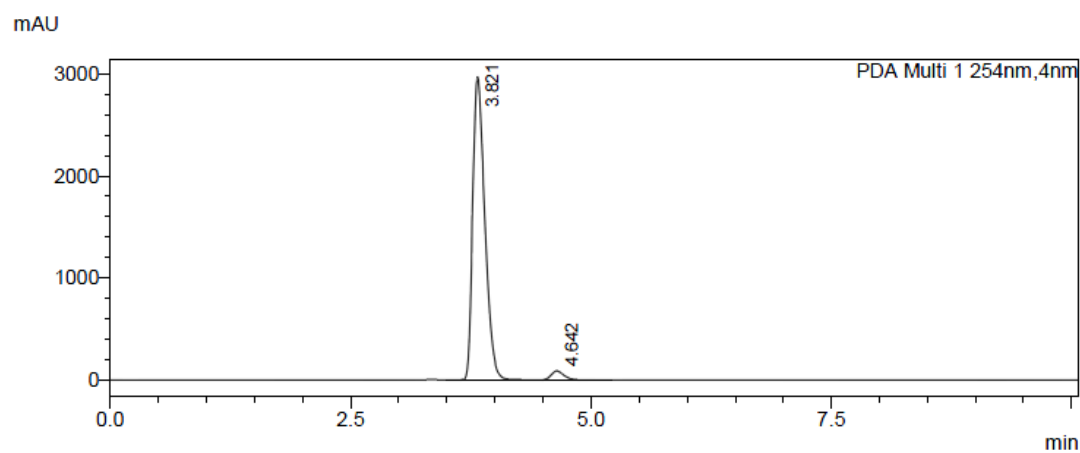

<Peak Table>

PDA Ch1 254nm

| Peak# | Ret. Time | Area     | Height  | Area%   |
|-------|-----------|----------|---------|---------|
| 1     | 3.821     | 26166337 | 2978369 | 96.985  |
| 2     | 4.642     | 813424   | 87613   | 3.015   |
| 总计    |           |          |         | 100.000 |

## Compound 4b

<Chromatogram>

mAU

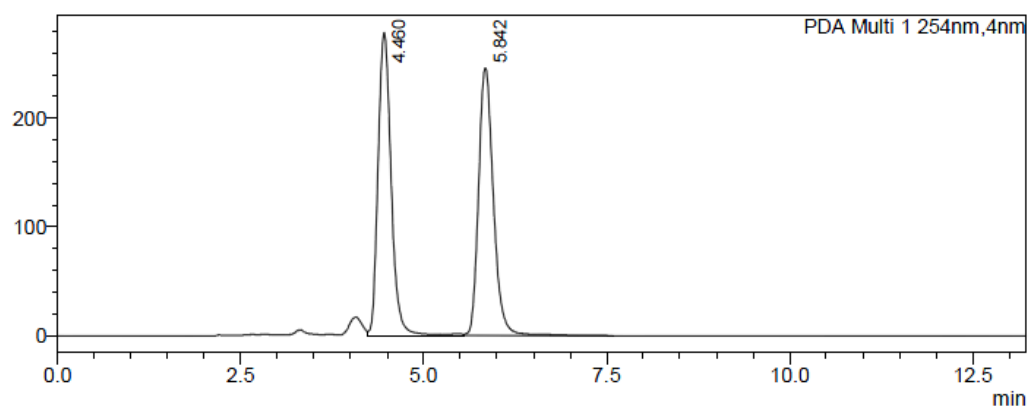

<Peak Table>

PDA Ch1 254nm

| Peak# | Ret. Time | Area    | Height | Area%   |
|-------|-----------|---------|--------|---------|
| 1     | 4.460     | 3474610 | 279075 | 49.918  |
| 2     | 5.842     | 3486064 | 246232 | 50.082  |
| 总计    |           |         |        | 100.000 |

<Chromatogram>

mAU

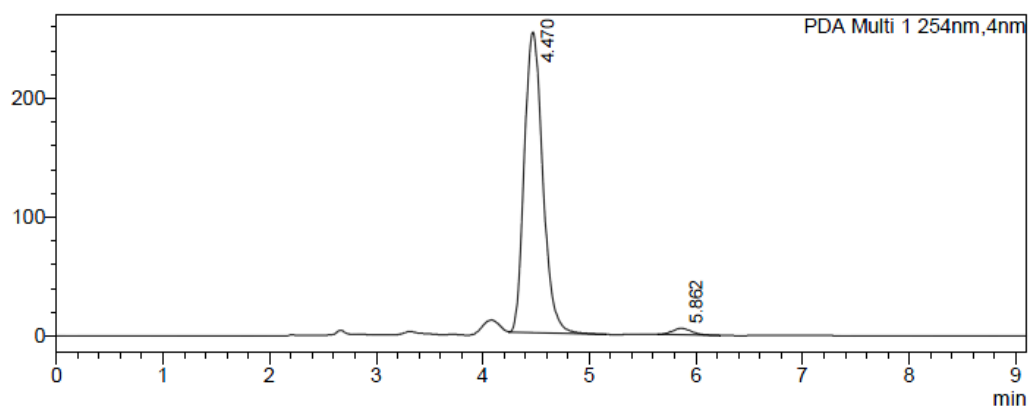

<Peak Table>

PDA Ch1 254nm

| Peak# | Ret. Time | Area    | Height | Area%   |
|-------|-----------|---------|--------|---------|
| 1     | 4.470     | 3051065 | 253900 | 97.833  |
| 2     | 5.862     | 67597   | 5299   | 2.167   |
| 总计    |           |         |        | 100.000 |

## Compound 4c

<Chromatogram>

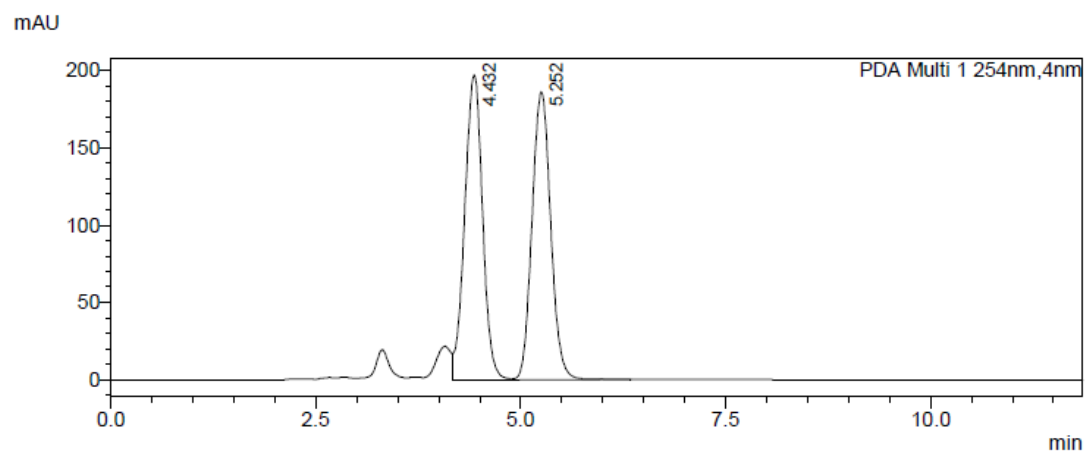

<Peak Table>

PDA Ch1 254nm

| Peak# | Ret. Time | Area    | Height | Area%   |
|-------|-----------|---------|--------|---------|
| 1     | 4.432     | 2980121 | 197015 | 50.233  |
| 2     | 5.252     | 2952495 | 186183 | 49.767  |
| 总计    |           |         |        | 100.000 |

<Chromatogram>

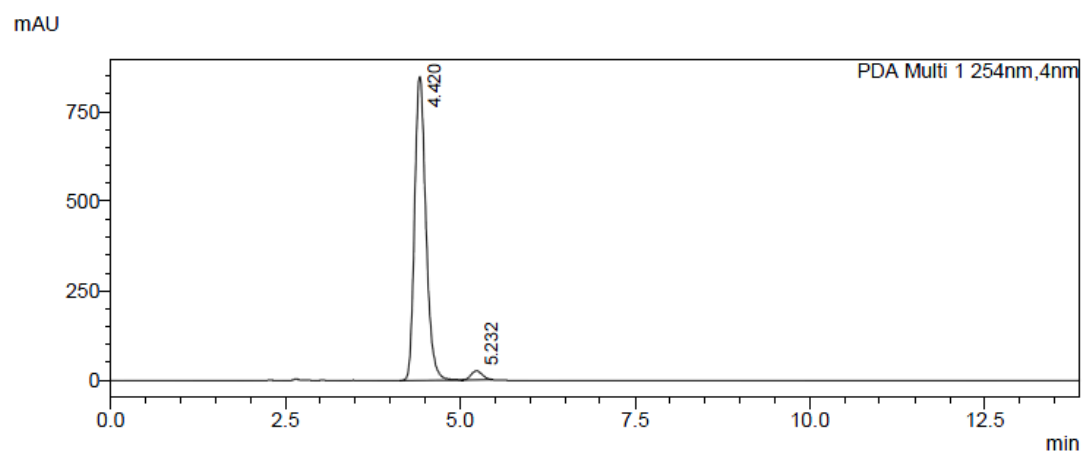

<Peak Table>

PDA Ch1 254nm

| Peak# | Ret. Time | Area    | Height | Area%   |
|-------|-----------|---------|--------|---------|
| 1     | 4.420     | 9531616 | 847833 | 97.172  |
| 2     | 5.232     | 277447  | 24526  | 2.828   |
| 总计    |           |         |        | 100.000 |



## Compound 4d

<Chromatogram>

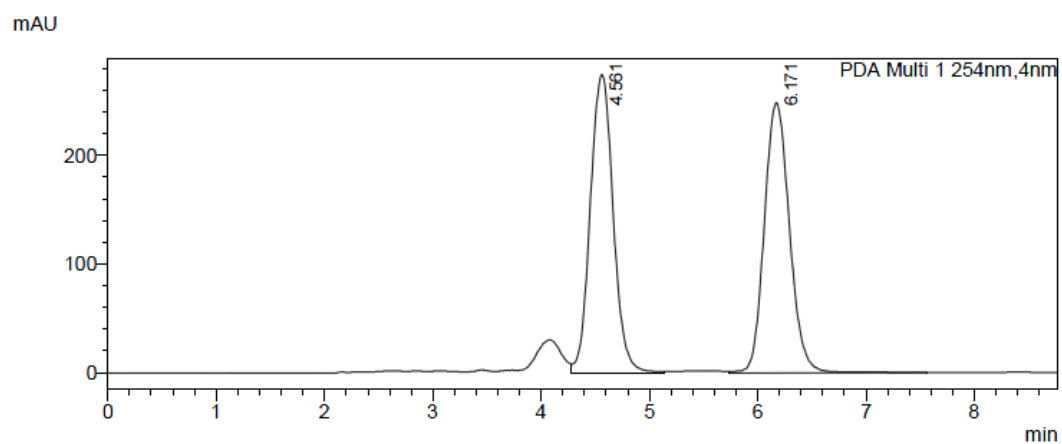

<Peak Table>

PDA Ch1 254nm

| Peak# | Ret. Time | Area    | Height | Area%   |
|-------|-----------|---------|--------|---------|
| 1     | 4.561     | 4039507 | 274057 | 50.121  |
| 2     | 6.171     | 4020059 | 248174 | 49.879  |
| 总计    |           |         |        | 100.000 |

<Chromatogram>

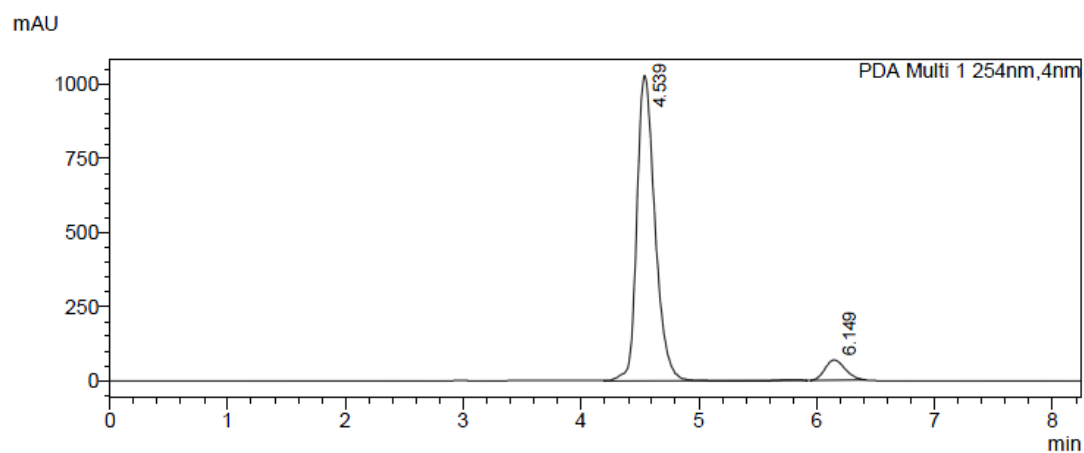

<Peak Table>

PDA Ch1 254nm

| Peak# | Ret. Time | Area     | Height  | Area%   |
|-------|-----------|----------|---------|---------|
| 1     | 4.539     | 10921719 | 1027727 | 93.204  |
| 2     | 6.149     | 796317   | 67681   | 6.796   |
| 总计    |           |          |         | 100.000 |

## Compound 4e

<Chromatogram>

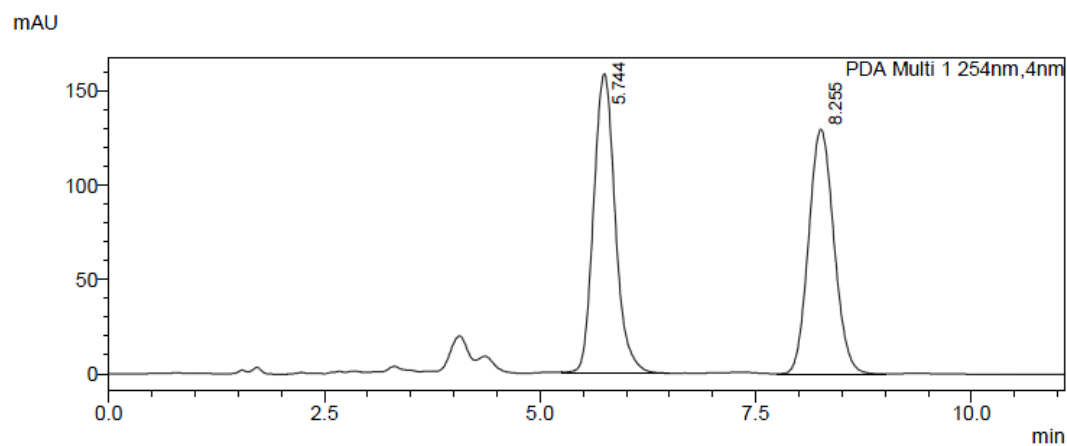

<Peak Table>

PDA Ch1 254nm

| Peak# | Ret. Time | Area    | Height | Area%   |
|-------|-----------|---------|--------|---------|
| 1     | 5.744     | 2782335 | 158938 | 51.259  |
| 2     | 8.255     | 2645666 | 129894 | 48.741  |
| 总计    |           |         |        | 100.000 |

<Chromatogram>

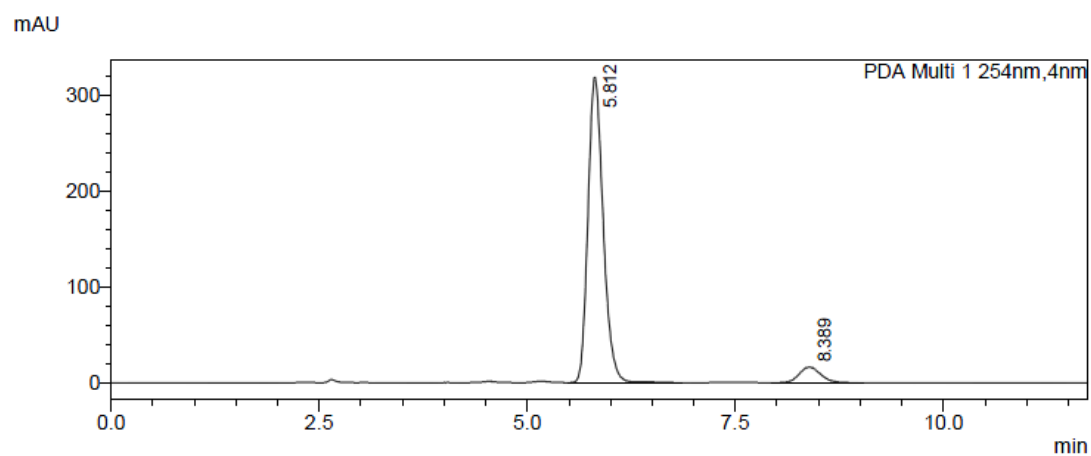

<Peak Table>

PDA Ch1 254nm

| Peak# | Ret. Time | Area    | Height | Area%   |
|-------|-----------|---------|--------|---------|
| 1     | 5.812     | 4056358 | 319474 | 93.270  |
| 2     | 8.389     | 292674  | 16324  | 6.730   |
| 总计    |           |         |        | 100.000 |

## Compound 4f

<Chromatogram>

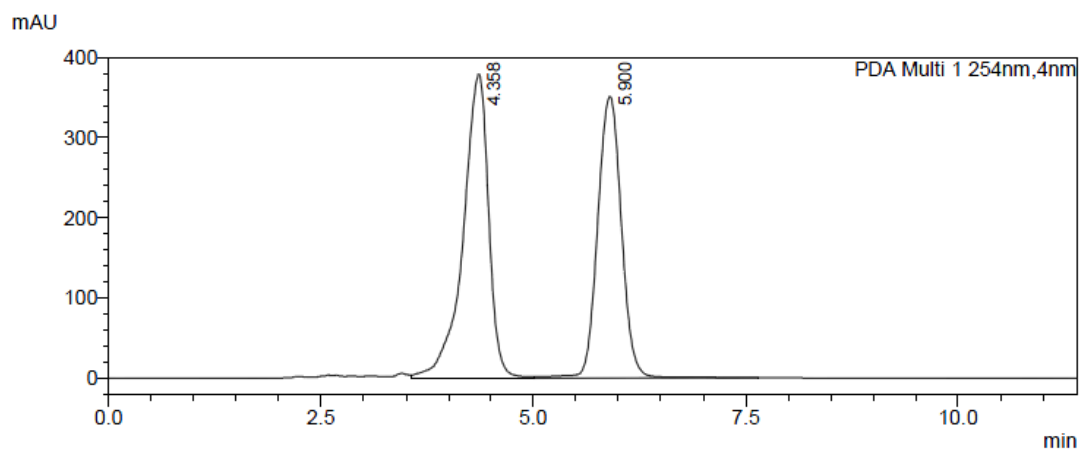

<Peak Table>

PDA Ch1 254nm

| Peak# | Ret. Time | Area    | Height | Area%   |
|-------|-----------|---------|--------|---------|
| 1     | 4.358     | 7933863 | 378647 | 53.642  |
| 2     | 5.900     | 6856436 | 351271 | 46.358  |
| 总计    |           |         |        | 100.000 |

<Chromatogram>

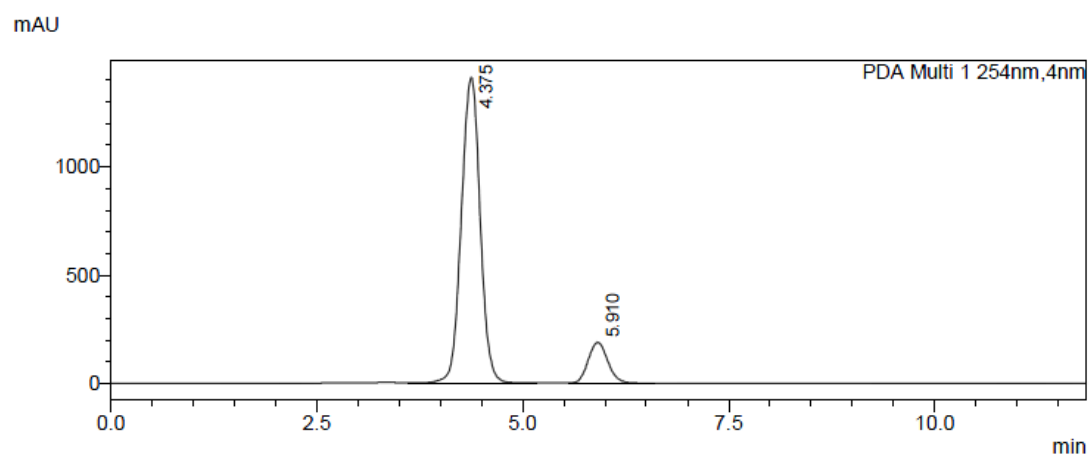

<Peak Table>

PDA Ch1 254nm

| Peak# | Ret. Time | Area     | Height  | Area%   |
|-------|-----------|----------|---------|---------|
| 1     | 4.375     | 22527570 | 1413138 | 87.843  |
| 2     | 5.910     | 3117764  | 188195  | 12.157  |
| 总计    |           |          |         | 100.000 |

1. H. Xie, Y. Zhang, S. Zhang, X. Chen and W. Wang, *Angewandte Chemie International Edition*, 2011, **50**, 11773-11776.
2. K. L. Kimmel, M. T. Robak and J. A. Ellman, *Journal of the American Chemical Society*, 2009, **131**, 8754-8755.
3. K.-F. Zhang, J. Nie, R. Guo, Y. Zheng and J.-A. Ma, *Advanced Synthesis & Catalysis*, 2013, **355**, 3497-3502.
4. H. Xie, A. Song, X. Zhang, X. Chen, H. Li, C. Sheng and W. Wang, *Chemical communications*, 2013, **49**, 928-930.
